# Supplementary material for: An enantiospecific route towards taiwaniaquinoids. First synthesis of (−)-taiwaniaquinone H and (−)-dichroanone
Source: Royal Society of Chemistry journal article supplement (doi:10.1039/b916209g), 2009-01-01

## **Electronic Supplementary Information (ESI)**

### **An enantiospecific route towards taiwaniaquinoids. First synthesis of (-)-taiwaniaquinone H and (-)-dichroanone**

Enrique Alvarez-Manzaneda,\* Rachid Chahboun, Eduardo Cabrera, Esteban Alvarez, Ali  
Haidour, Jose Miguel Ramos, Ramón Alvarez-Manzaneda, Yahia Charrah, Hakima Es-Samti

*\*Departamento de Química Orgánica, Facultad de Ciencias, Instituto de Biotecnología,  
Universidad de Granada, 18071 Granada, Spain.*

*eamr@ugr.es*

### **Contents**

|                                                                              |      |
|------------------------------------------------------------------------------|------|
| Experimental section .....                                                   | 2-7  |
| <sup>1</sup> H and <sup>13</sup> C NMR Spectra for all Novel Compounds ..... | 8-47 |

## Experimental Section

### Treatment of **13** with $\text{BF}_3 \cdot \text{Et}_2\text{O}$ .

$\text{BF}_3 \cdot \text{Et}_2\text{O}$  (45%, 0.3 mL, 2.36 mmol) was added at 0 °C to a stirred solution of **13** (160 mg, 0.64 mmol) in  $\text{CH}_2\text{Cl}_2$  (10 mL) and the cooling bath was removed. After stirring for 5h at room temperature, satd aq  $\text{NaHCO}_3$  (1 mL) was added slowly at 0°C, and the solvent was removed in vacuum and the mixture was extracted with ether (2 x 15 mL). The organic phase was washed with water, brine, dried over  $\text{Na}_2\text{SO}_4$  and concentrated to give the unaltered starting material **13** (152 mg) as a yellow oil.

### Treatment of **13** with $\text{SOCl}_2$ .

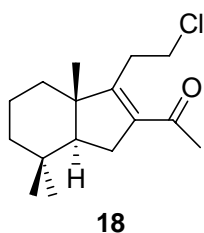

Thionyl chloride (mL) was added to a solution of **13** (176 mg, 0.70 mmol) and pyridine (1 mL) in dry  $\text{CH}_2\text{Cl}_2$  (10 mL) at -78 °C and the reaction mixture was warmed to -58°C for 45 min, and stirred for 10 min, at which time TLC showed no starting material. Then the reaction mixture was poured into ice and extracted with ether (3 x 10 mL). The combined organic phase was washed with 2N HCl (3 x 8 mL), water and brine, dried ( $\text{Na}_2\text{SO}_4$ ) and the solvent was evaporated to give a crude product which was chromatographed on silica gel (5% ether/hexanes) to give 113 mg (60%) of **18** as a yellow syrup.  $[\alpha]_D^{25} = +33.6$  (c 0.75,  $\text{CHCl}_3$ );  $^1\text{H}$  NMR ( $\text{CDCl}_3$ , 500 MHz)  $\delta$ : 0.88 (s, 3H), 0.92 (s, 3H), 0.98 (s, 3H), 1.13 (ddd,  $J = 13.8, 13.8, 4.6$  Hz, 1H), 1.31 (ddd,  $J = 13.5, 13.5, 4.1$  Hz, 1H), 1.45-1.55 (m, 2H), 1.58-1.65 (m, 1H), 1.66-1.77 (m, 3H), 2.21 (s, 3H), 2.38 (d,  $J = 8.9$  Hz, 1H), 2.48 (ddd,  $J = 16.1, 10.1, 8.9$  Hz, 1H), 3.04 (m, 1H), 3.51 (ddd,  $J = 10.1, 10.1, 6.0$  Hz, 1H), 3.68 (ddd,  $J = 10.1, 10.1, 5.6$  Hz, 1H).  $^{13}\text{C}$  NMR ( $\text{CDCl}_3$ , 125 MHz)  $\delta$ : 16.9 ( $\text{CH}_3$ ), 19.7 ( $\text{CH}_2$ ), 21.3 ( $\text{CH}_3$ ), 29.9 ( $\text{CH}_3$ ), 30.8 ( $\text{CH}_2$ ), 31.0 ( $\text{CH}_2$ ), 32.94 ( $\text{CH}_3$ ), 32.92 (C), 34.4 ( $\text{CH}_2$ ),

41.4 (CH<sub>2</sub>), 42.5 (CH<sub>2</sub>), 49.9 (C), 57.6 (CH), 137.0 (C), 163.1 (C), 198.8 (C); IR (cm<sup>-1</sup>) v: 1684, 1603, 1560, 1450, 1294, 1274, 1201, 1057, 1003, 860; HRMS [FAB, (M + Na)<sup>+</sup>] m/z: calcd for C<sub>16</sub>H<sub>25</sub>OCINa 291.1492, found: 291.1501.

#### Treatment of **13** with POCl<sub>3</sub>.

Phosphorous oxychloride (0.2 mL) was added to a solution of **13** (141 mg, 0.56 mmol) and pyridine (1 mL) in dry CH<sub>2</sub>Cl<sub>2</sub> (8 mL) at -78 °C and the reaction mixture was warmed to -59°C for 35 min, and stirred for 3h, at which time TLC showed no starting material. Then, the reaction mixture was poured into ice and extracted with ether (3 x 10 mL). The combined organic phase was washed with 2N HCl (3 x 8 mL), water and brine, dried (Na<sub>2</sub>SO<sub>4</sub>) and the solvent was evaporated to give a crude product which was chromatographed on silica gel (7% ether/hexanes) to give 26 mg (20%) of **17** and 53 mg (35%) of **18**.

#### Treatment of **13** with conc. HCl.

Conc. HCl (0.1 mL) was added to a solution of **13** (250 mg, 1 mmol) in CH<sub>2</sub>Cl<sub>2</sub> (10 mL) and the reaction mixture was stirred at room temperature for 1h, at which time TLC showed no **13**. Then the mixture was diluted with ether (25 mL) washed with water, satd aq NaHCO<sub>3</sub> (2 x 5 mL) and brine. The organic phase was dried over Na<sub>2</sub>SO<sub>4</sub> and concentrated to give 260 mg (97%) of **18**.

#### 1-((3a*S*,7a*S*)-3a,7,7-Trimethyl-3-vinyl-3a,4,5,6,7,7a-hexahydro-1*H*-inden-2-yl)ethanone (**17**).

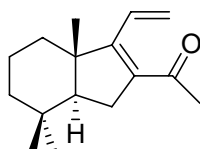

**17**

To a solution of **13** (0.2 g, 0.8 mmol) in 1,4-dioxane (7 mL) was added 3 drops of conc. H<sub>2</sub>SO<sub>4</sub> and the reaction mixture was stirred at room temperature for 4 h at which time TLC showed no starting material. Then water (3 mL) was slowly added to quench the reaction and the solvent was removed in vacuum, and the mixture was diluted with ether (20 mL), washed with water (3 x 6 mL), brine (2 x 5 mL), dried

over anhydrous  $\text{Na}_2\text{SO}_4$  to give a crude product which was purified by flash chromatography on silica gel (5% ether/hexane, 2.5 cm x 18 cm) to give 135 mg of **17** (73%) as a colourless oil.  $[\alpha]_{\text{D}}^{25} = -59.5$  (c 1.1,  $\text{CHCl}_3$ );  $^1\text{H}$  NMR ( $\text{CDCl}_3$ , 500 MHz)  $\delta$ : 0.90 (s, 3H), 0.97 (s, 3H), 1.04 (s, 3H), 1.12 (ddd,  $J = 13.6, 13.6, 4.5$  Hz, 1H), 1.43 (m, 1H), 1.46 (ddd,  $J = 12.8, 12.8, 4.1$  Hz, 1H), 1.52 (dd,  $J = 11.8, 6.7$  Hz, 1H), 1.60 (m, 1H), 1.73 (qt,  $J = 13.7, 3.9$  Hz, 1H), 1.98 (dt,  $J = 12.3, 3.4$  Hz, 1H), 2.24 (s, 3H), 2.36 (dd,  $J = 15.1, 11.8$  Hz, 1H), 2.42 (dd,  $J = 15.1, 6.7$  Hz, 1H), 5.32 (d,  $J = 11.8$  Hz, 1H), 5.57 (d,  $J = 18.2$  Hz, 1H), 6.94 (dd,  $J = 18.2, 11.8$  Hz, 1H);  $^{13}\text{C}$  NMR ( $\text{CDCl}_3$ , 125 MHz)  $\delta$ : 17.7 ( $\text{CH}_3$ ), 19.9 ( $\text{CH}_2$ ), 21.3 ( $\text{CH}_3$ ), 30.3 (C), 30.9 ( $\text{CH}_2$ ), 32.9 ( $\text{CH}_3$ ), 33.0 (C), 35.9 ( $\text{CH}_2$ ), 40.9 ( $\text{CH}_2$ ), 50.0 (C), 57.3 (CH), 120.1 ( $\text{CH}_2$ ), 130.7 (CH), 137.7 (C), 159.9 (C), 199.8 (C); IR ( $\text{cm}^{-1}$ )  $\nu$ : 1669, 1545, 1459, 1355, 1232, 1208, 1114, 1078, 1011, 972, 912; HRMS [FAB,  $(\text{M} + \text{Na})^+$ ]  $m/z$ : calcd for  $\text{C}_{16}\text{H}_{24}\text{ONa}$  255.1725, found: 255.1737.

**(4aS, 9aS)-7-Isopropyl-8-methoxy-1, 1, 4a-trimethyl-2, 3, 4, 4a, 9, 9a-hexahydro-1H-fluorene (22).**

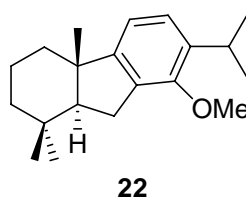

$\text{K}_2\text{CO}_3$  (360 mg, 2.61 mmol) and MeI (710 mg, 5.0 mmol) was added to a solution of **10** (281 mg, 1.03 mmol) in acetone (25 mL) and the mixture was stirred under reflux for 17 h. The mixture, cooled at room temperature, was filtered and the solvent was removed under vacuum. The crude residue was diluted with ether (30 mL)- water (10 mL) and the phases were shaken and separated. The organic phase was washed with brine (15 mL) and dried under anhydrous  $\text{Na}_2\text{SO}_4$ . After evaporating the solvent, compound **22** (285 mg, 97%) was obtained as a colourless syrup.  $[\alpha]_{\text{D}}^{25} = -35.5$  (c 2.4,  $\text{CHCl}_3$ );  $^1\text{H}$  NMR ( $\text{CDCl}_3$ , 500 MHz)  $\delta$ (ppm): 0.98 (s, 3H), 1.06 (s, 6H), 1.19 (ddd,  $J = 13.6, 13.6, 4.2$  Hz, 1H), 1.20 (d,  $J = 6.9$  Hz, 3H), 1.25 (d,  $J = 6.9$  Hz, 3H), 1.46 (ddd,  $J = 12.8, 12.8, 3.9$  Hz, 1H), 1.54 (dt,  $J = 13.4, 3.1$  Hz, 1H), 1.67 (m, 1H), 1.71 (bd,  $J = 12.5, 6.1$  Hz, 1H), 1.83 (qt,  $J = 13.6, 3.9$  Hz, 1H), 2.05 (dt,  $J = 12.4, 3.9$  Hz, 1H), 2.66 (dd,  $J = 14.3, 12.5$  Hz, 1H), 2.82 (dd,  $J =$

14.3, 6.1 Hz, 1H), 3.01 (h,  $J$  = 6.9 Hz, 1H), 3.83 (s, 3H), 6.77 (d,  $J$  = 7.6 Hz, 1H), 7.02 (d,  $J$  = 7.6 Hz, 1H).  $^{13}\text{C}$  NMR ( $\text{CDCl}_3$ , 125 MHz)  $\delta$ : 20.0 ( $\text{CH}_2$ ), 21.0 ( $\text{CH}_3$ ), 21.7 ( $\text{CH}_3$ ), 23.7 ( $\text{CH}_3$ ), 23.9 ( $\text{CH}_3$ ), 26.8 ( $\text{CH}_2$ ), 27.1 ( $\text{CH}$ ), 33.0 (C), 33.2 ( $\text{CH}_3$ ), 35.8 ( $\text{CH}_2$ ), 41.6 ( $\text{CH}_2$ ), 45.5 (C), 60.0 ( $\text{CH}_3$ ), 60.4 ( $\text{CH}$ ), 115.5 ( $\text{CH}$ ), 124.5 ( $\text{CH}$ ), 132.9 (C), 138.0 (C), 154.2 (C), 155.5 (C). IR ( $\text{cm}^{-1}$ )  $\nu$ : 1474, 1458, 1420, 1341, 1249, 1200, 1096, 1059, 1024, 818; HRMS [FAB,  $(\text{M} + \text{Na})^+$ ]  $m/z$ : calcd for  $\text{C}_{20}\text{H}_{30}\text{ONa}$  309.2194, found: 309.2183.

**(4bS, 8aS)-2-Isopropyl-4b,8,8- trimethyl-5, 6, 7, 8a, 9-hexahydro-4bH- fluoren-1-yl acetate (28).**

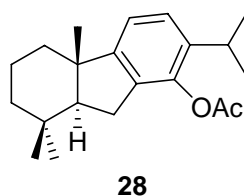

To a solution of phenol **10** (220 mg, 0.80 mmol) in pyridine (7 mL) was added acetic anhydride (5 mL) and the solution was stirred at room temperature for 1 h. Then water was added at 0°C to quench the reaction and stirred for 10 min and ether (30 mL) was added. The organic phase was washed with water (10 mL), 2N HCl (4 x 10 mL), satd aq  $\text{NaHCO}_3$  (6 x 10 mL), brine and dried over anhydrous  $\text{Na}_2\text{SO}_4$ . The solvent was evaporated under vacuum, affording pure acetate **28** (246 mg, 98%).  $[\alpha]_{\text{D}}^{25} = -33.3$  (c 1.4,  $\text{CHCl}_3$ );  $^1\text{H}$  NMR ( $\text{CDCl}_3$ , 500 MHz)  $\delta$ : 0.95 (s, 3H), 1.02 (s, 3H), 1.05 (s, 3H), 1.19 (d,  $J$  = 6.9 Hz, 3H), 1.21 (d,  $J$  = 6.9 Hz, 3H), 1.47 (ddd,  $J$  = 13.6, 13.6, 3.9 Hz, 1H), 1.52 (dt,  $J$  = 13.3, 4.1 Hz, 1H), 1.65 (m, 1H), 1.73 (bd,  $J$  = 10.8, 8.2 Hz, 1H), 1.82 (qt,  $J$  = 13.6, 3.9 Hz, 1H), 2.04 (dt,  $J$  = 12.3, 3.4 Hz, 1H), 2.34 (s, 3H), 2.49 (d,  $J$  = 10.8 Hz, 1H), 2.51 (d,  $J$  = 8.2 Hz, 1H), 2.99 (h,  $J$  = 6.9 Hz, 1H), 6.90 (d,  $J$  = 7.7 Hz, 1H), 7.10 (d,  $J$  = 7.7 Hz, 1H);  $^{13}\text{C}$  NMR (125 MHz,  $\text{CDCl}_3$ )  $\delta$ : 20.0 ( $\text{CH}_2$ ), 20.8 ( $\text{CH}_3$ ), 21.0 ( $\text{CH}_3$ ), 21.8 ( $\text{CH}_3$ ), 23.3 ( $\text{CH}$ ), 23.4 ( $\text{CH}_3$ ), 26.9 ( $\text{CH}_2$ ), 27.5 ( $\text{CH}$ ), 33.0 (C), 33.2 ( $\text{CH}_3$ ), 35.7 ( $\text{CH}_2$ ), 41.6 ( $\text{CH}_2$ ), 46.1 (C), 59.9 ( $\text{CH}$ ), 118.1 ( $\text{CH}$ ), 124.7 ( $\text{CH}$ ), 134.1 (C), 137.3 (C), 144.8 (C), 155.0 (C), 168.9 (C); IR ( $\text{cm}^{-1}$ )  $\nu$ : 1764, 1459, 1368, 1213, 1178, 1012, 901, 822, 758. HRMS [FAB,  $(\text{M} + \text{Na})^+$ ]  $m/z$ : calcd for  $\text{C}_{21}\text{H}_{30}\text{O}_2\text{Na}$  337.2143, found: 337.2136.

**(4bS,8aS) Methyl 1-Methoxy -4b,8,8-trimethyl-5,6,7,8,8a,9-hexahydro-4bH-fluoren-2-carboxylate (33).**

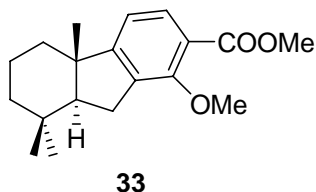

K<sub>2</sub>CO<sub>3</sub> (436 mg, 3.57 mmol) and MeI (0.27 mL, 3.57 mmol) was added to a solution of **20** (320 mg, 1.19 mmol) in acetone (25 mL) and the mixture was stirred under reflux for 8 h, at which time TLC showed no starting material. Following the same work-up described for ester **22**, compound **33** (329 mg, 98%) was obtained as a colourless oil.  $[\alpha]_D^{25} = -25.2$  (c 2.7, CHCl<sub>3</sub>); <sup>1</sup>H NMR (CDCl<sub>3</sub>, 500 MHz)  $\delta$ : 0.91 (s, 3H), 0.97 (s, 3H), 0.97 (s, 3H), 1.12 (ddd,  $J = 13.7, 13.7, 4.3$  Hz, 1H), 1.37 (ddd,  $J = 12.7, 12.7, 3.9$  Hz, 1H), 1.47 (dt,  $J = 13.4, 3.1$  Hz, 1H), 1.61 (m, 1H), 1.61 (dd,  $J = 12.6, 6.1$  Hz, 1H), 1.75 (qt,  $J = 13.5, 3.9$  Hz, 1H), 1.97 (dt,  $J = 12.4, 3.1$  Hz, 1H), 2.55 (dd,  $J = 14.6, 12.6$  Hz, 1H), 2.78 (dd,  $J = 14.6, 6.1$  Hz, 1H), 3.81 (s, 3H), 6.75 (d,  $J = 7.7$  Hz, 1H), 7.56 (d,  $J = 7.7$  Hz, 1H); <sup>13</sup>C NMR (CDCl<sub>3</sub>, 125 MHz)  $\delta$ : 19.9 (CH<sub>2</sub>), 21.1 (CH<sub>3</sub>), 21.4 (CH<sub>3</sub>), 26.7 (CH<sub>2</sub>), 33.17 (CH<sub>3</sub>), 33.18 (C), 35.4 (CH<sub>2</sub>), 41.5 (CH<sub>2</sub>), 46.3 (C), 52.0 (CH), 59.8 (OCH<sub>3</sub>), 61.2 (OCH<sub>3</sub>), 115.6 (CH), 121.7 (C), 130.5 (CH), 135.2 (C), 156.6 (C), 162.7 (C), 167.1 (C); IR (cm<sup>-1</sup>)  $\nu$ : 1726, 1604, 1458, 1288. HRMS [FAB, (M + Na)<sup>+</sup>]  $m/z$ : calcd for C<sub>19</sub>H<sub>26</sub>O<sub>3</sub>Na 325.1780, found: 325.1793.

**(4aS)-8-Methoxy-1,1,4a-trimethyl-2, 3, 4, 4a,9,9a-hexahydro-1H-fluorene (37).**

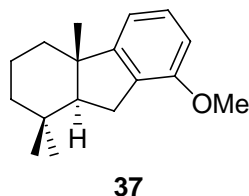

K<sub>2</sub>CO<sub>3</sub> (234 mg, 1.69 mmoles, 3 eq.) and MeI (0.24 g, 1.41 mmoles, 3eq.) was added to a solution of phenol **36** (130 mg, 0.56 mmol) in acetone (10 mL) and the mixture was stirred under reflux for 6 h. After cooling at room temperature, the mixture was filtered and the solvent evaporated. Following the same work-up described for ester **22**,

compound **37** (132 mg, 96%) was isolated as a yellow syrup;  $[\alpha]_D^{25} = -19.3$  (c 1.8, CHCl<sub>3</sub>); <sup>1</sup>H NMR (CDCl<sub>3</sub>, 400 MHz)  $\delta$ : 0.89 (s, 3H), 0.96 (s, 3H), 0.97 (s, 3H), 1.12 (ddd,  $J = 13.4, 13.4, 4.3$  Hz, 1H), 1.38 (ddd,  $J = 12.8, 12.8, 4.2$  Hz, 1H), 1.46 (dt,  $J = 13.4, 2.8$  Hz, 1H), 1.59 (bd,  $J = 12.9$  Hz, 1H), 1.62 (dd,  $J = 12.4, 6.3$  Hz, 1H), 1.76 (qt,  $J = 13.9, 3.9$  Hz, 1H), 1.97 (dt,  $J = 12.4, 2.8$  Hz, 1H), 2.45 (bd,  $J = 14.6, 12.4$  Hz, 1H), 2.70 (dd,  $J = 14.6, 6.3$  Hz, 1H), 3.78 (s, 3H), 6.59 (d,  $J = 8.2$  Hz, 1H), 6.61 (d,  $J = 7.3$  Hz, 1H), 7.07 (dd,  $J = 8.2, 7.3$  Hz, 1H); <sup>13</sup>C NMR (CDCl<sub>3</sub>, 125 MHz)  $\delta$ : 19.0 (CH<sub>2</sub>), 20.0 (CH<sub>3</sub>), 20.4 (CH<sub>3</sub>), 24.9 (CH<sub>2</sub>), 32.0 (C), 32.2 (CH<sub>3</sub>), 34.7 (CH<sub>2</sub>), 40.6 (CH<sub>2</sub>), 45.1 (C), 54.2 (OCH<sub>3</sub>), 58.9 (CH), 106.8 (CH), 112.0 (CH), 126.6 (CH), 128.4 (C), 154.9 (C), 156.5 (C). IR (cm<sup>-1</sup>)  $\nu$ : 3000, 2954, 2954, 2926, 2850, 1605, 1583, 1478, 1268, 1070, 1038, 785; HRMS [FAB, (M + Na)<sup>+</sup>]  $m/z$ : calcd for C<sub>17</sub>H<sub>24</sub>ONa 267.1725, found: 267.1738.

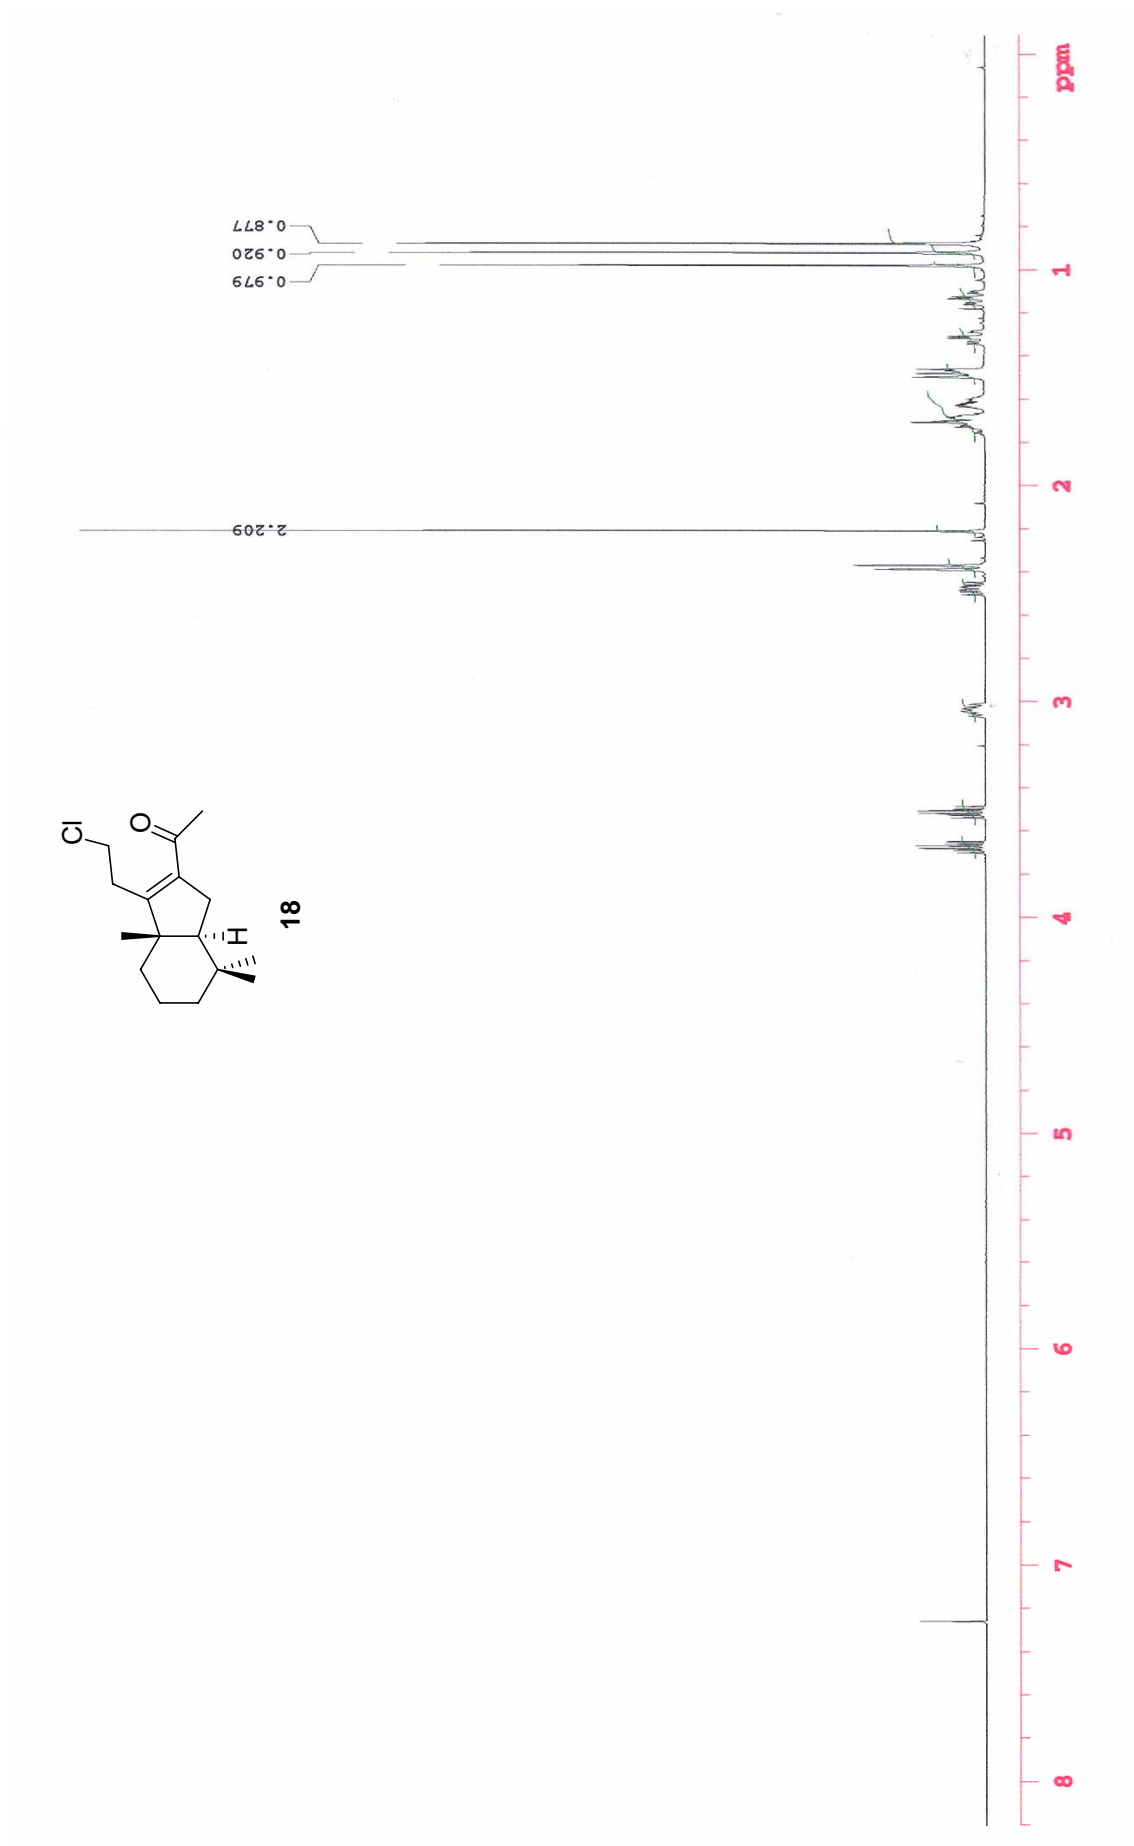



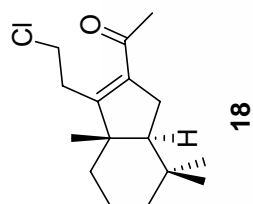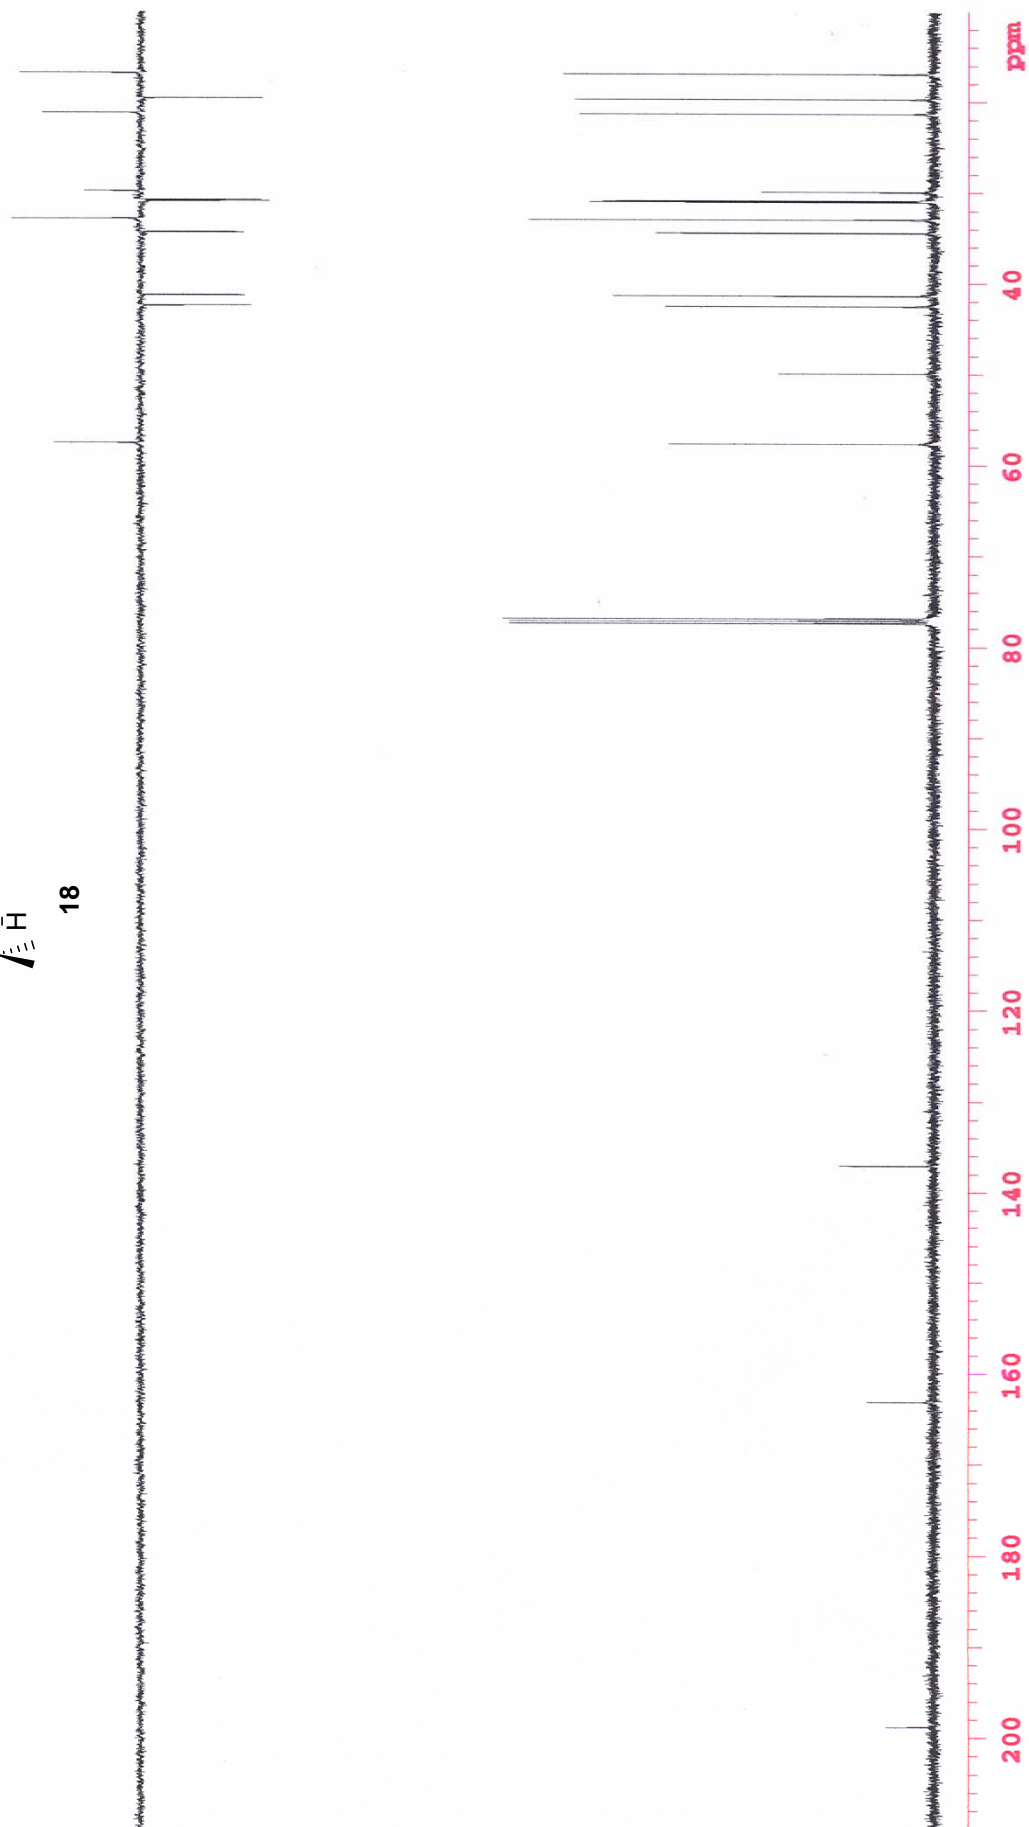

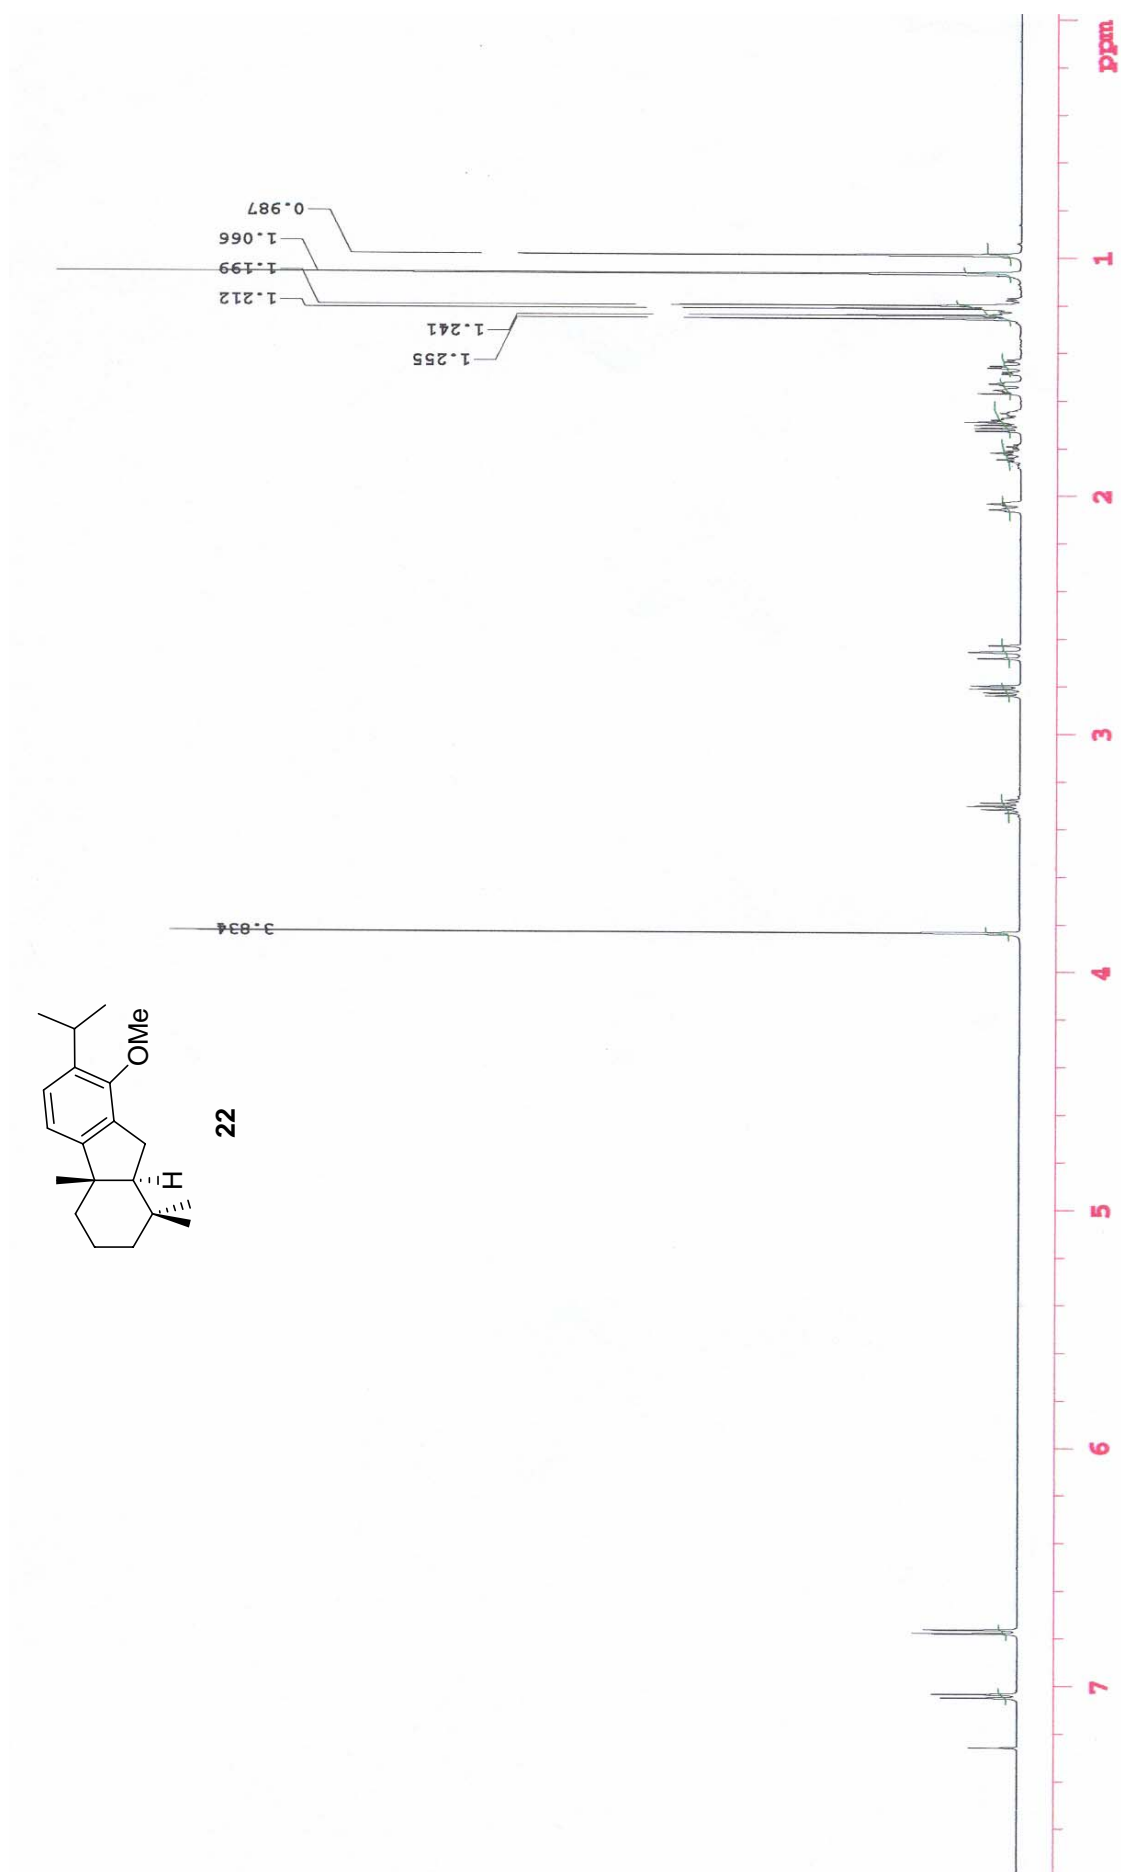

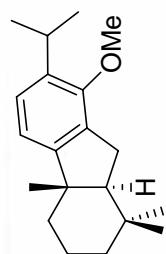

22

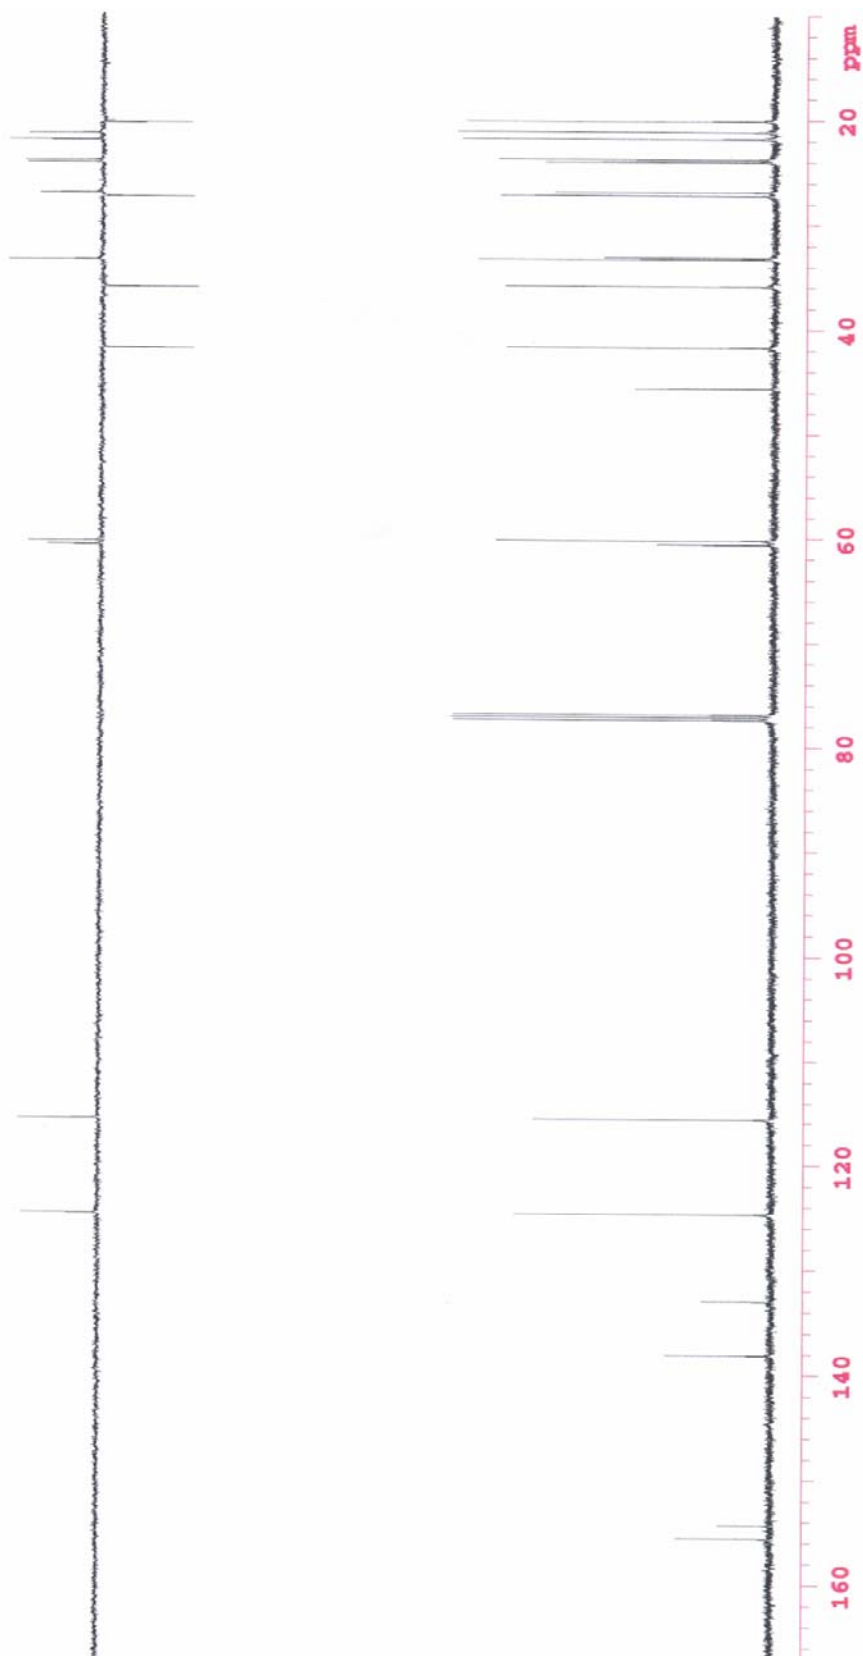

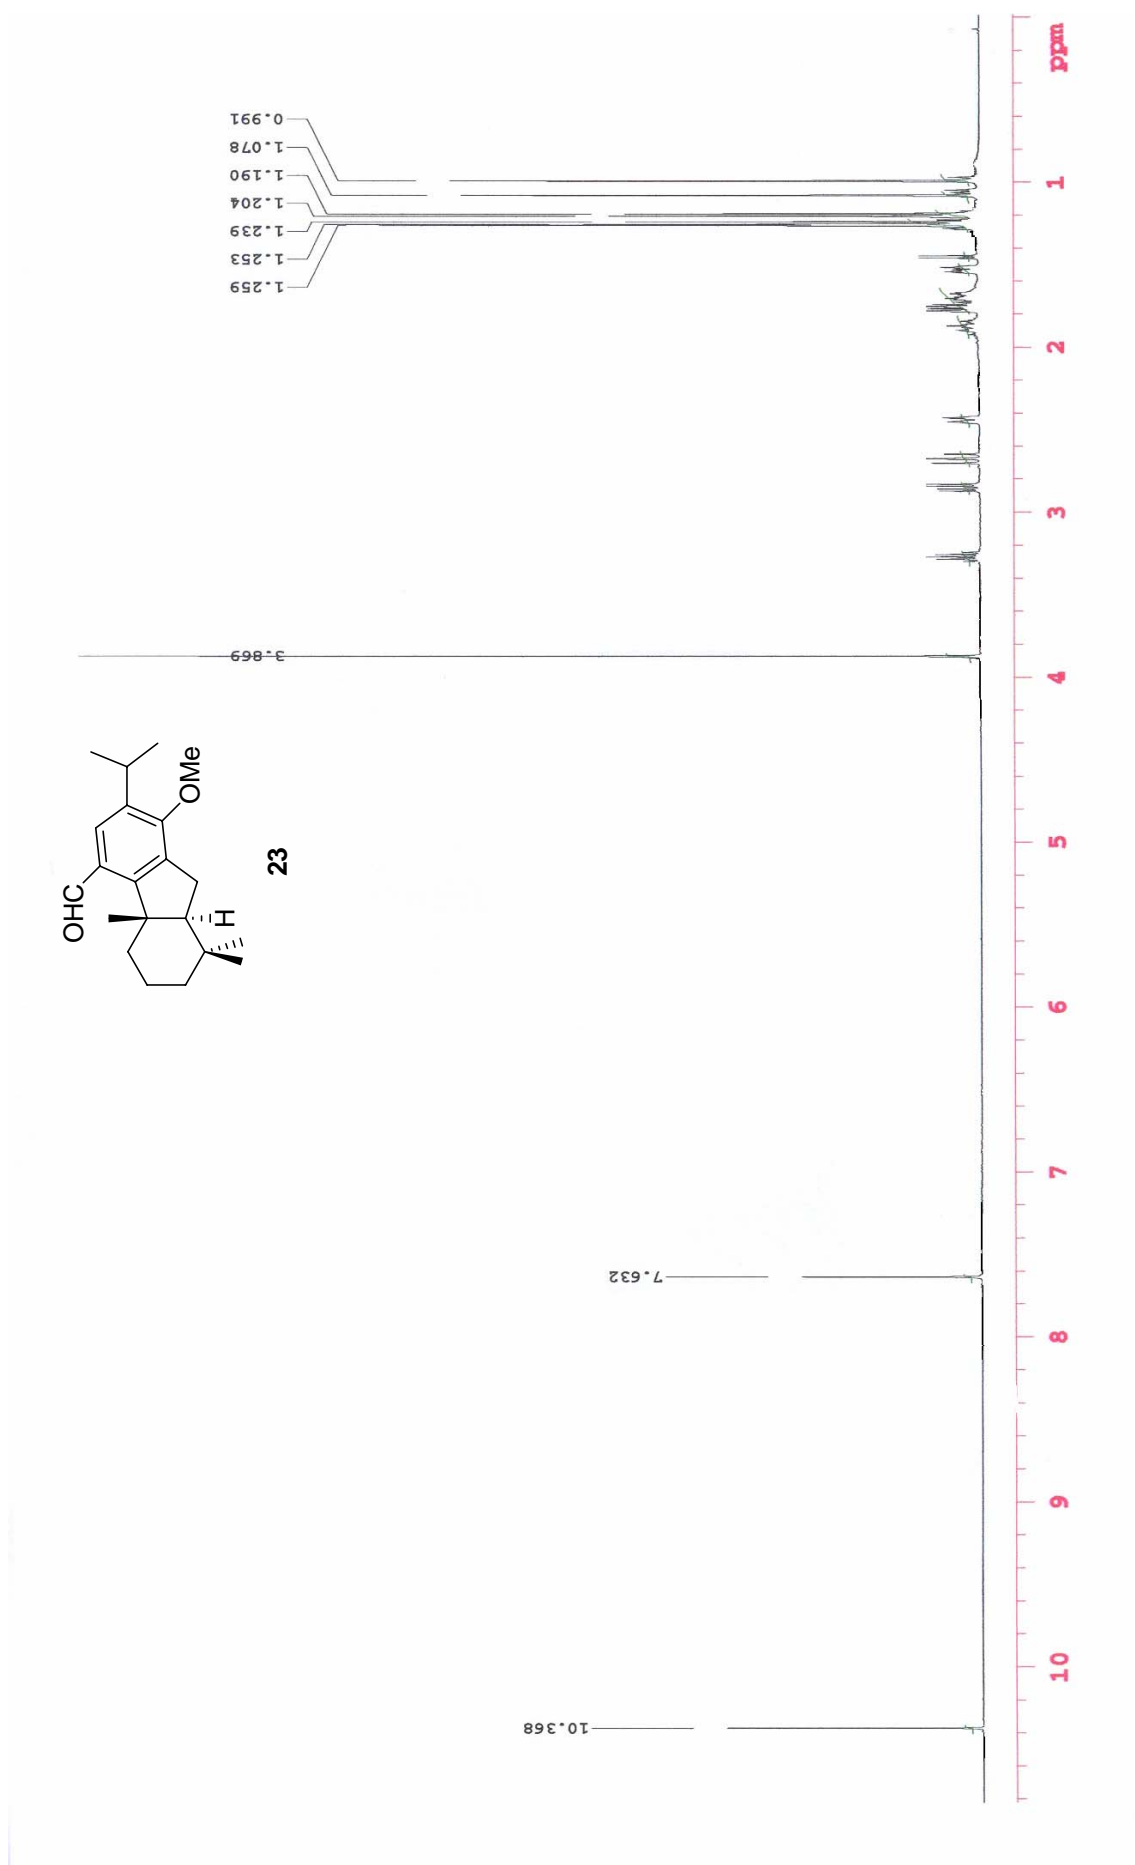

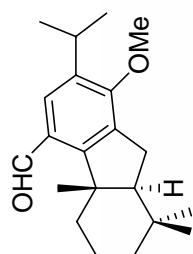

23

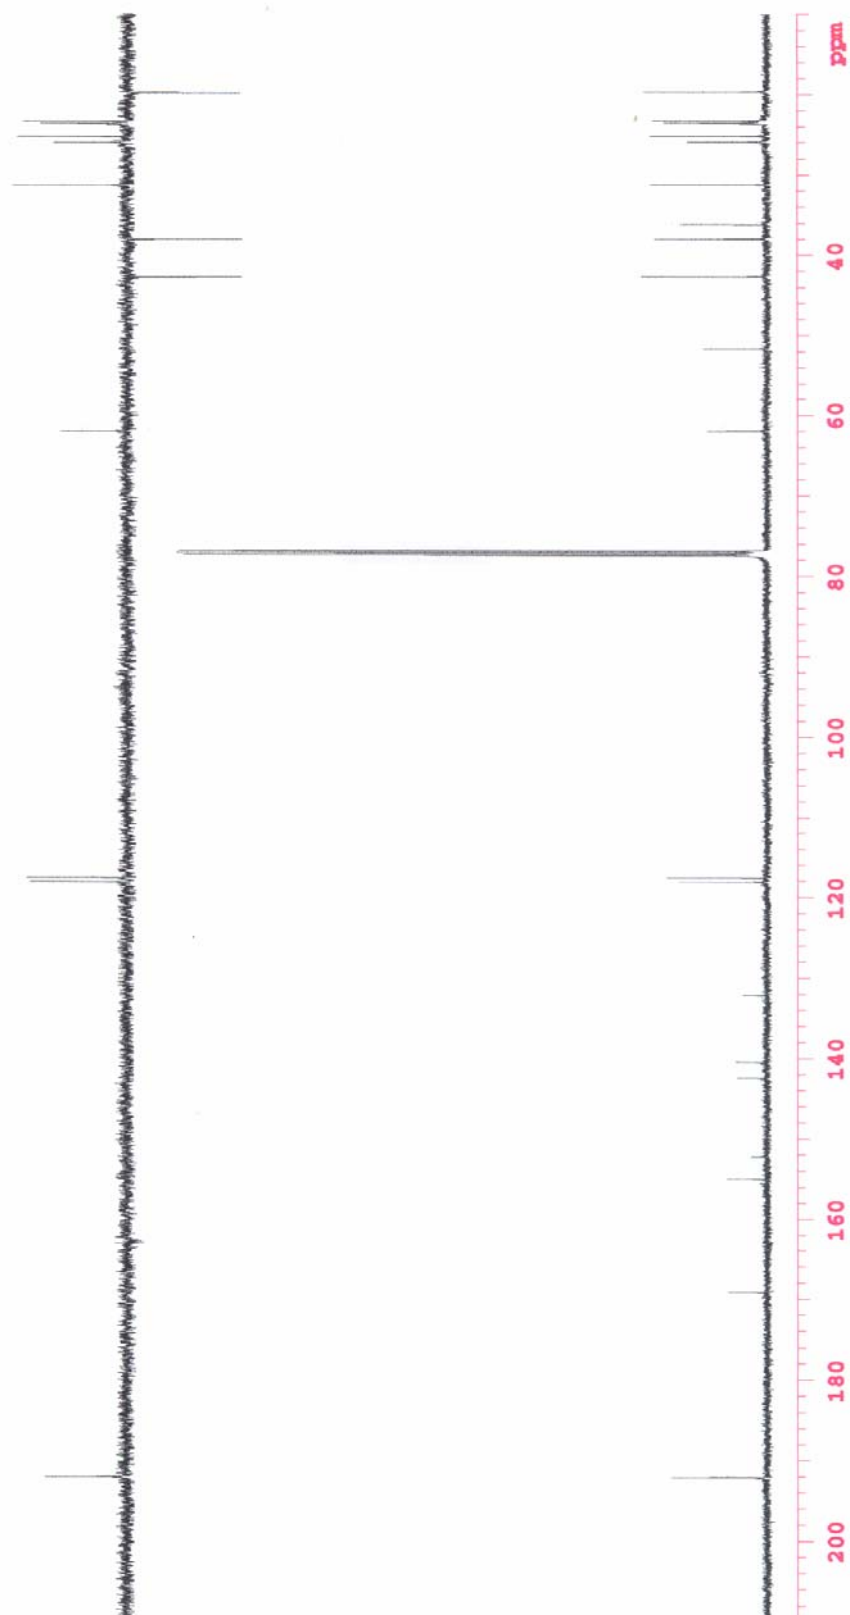

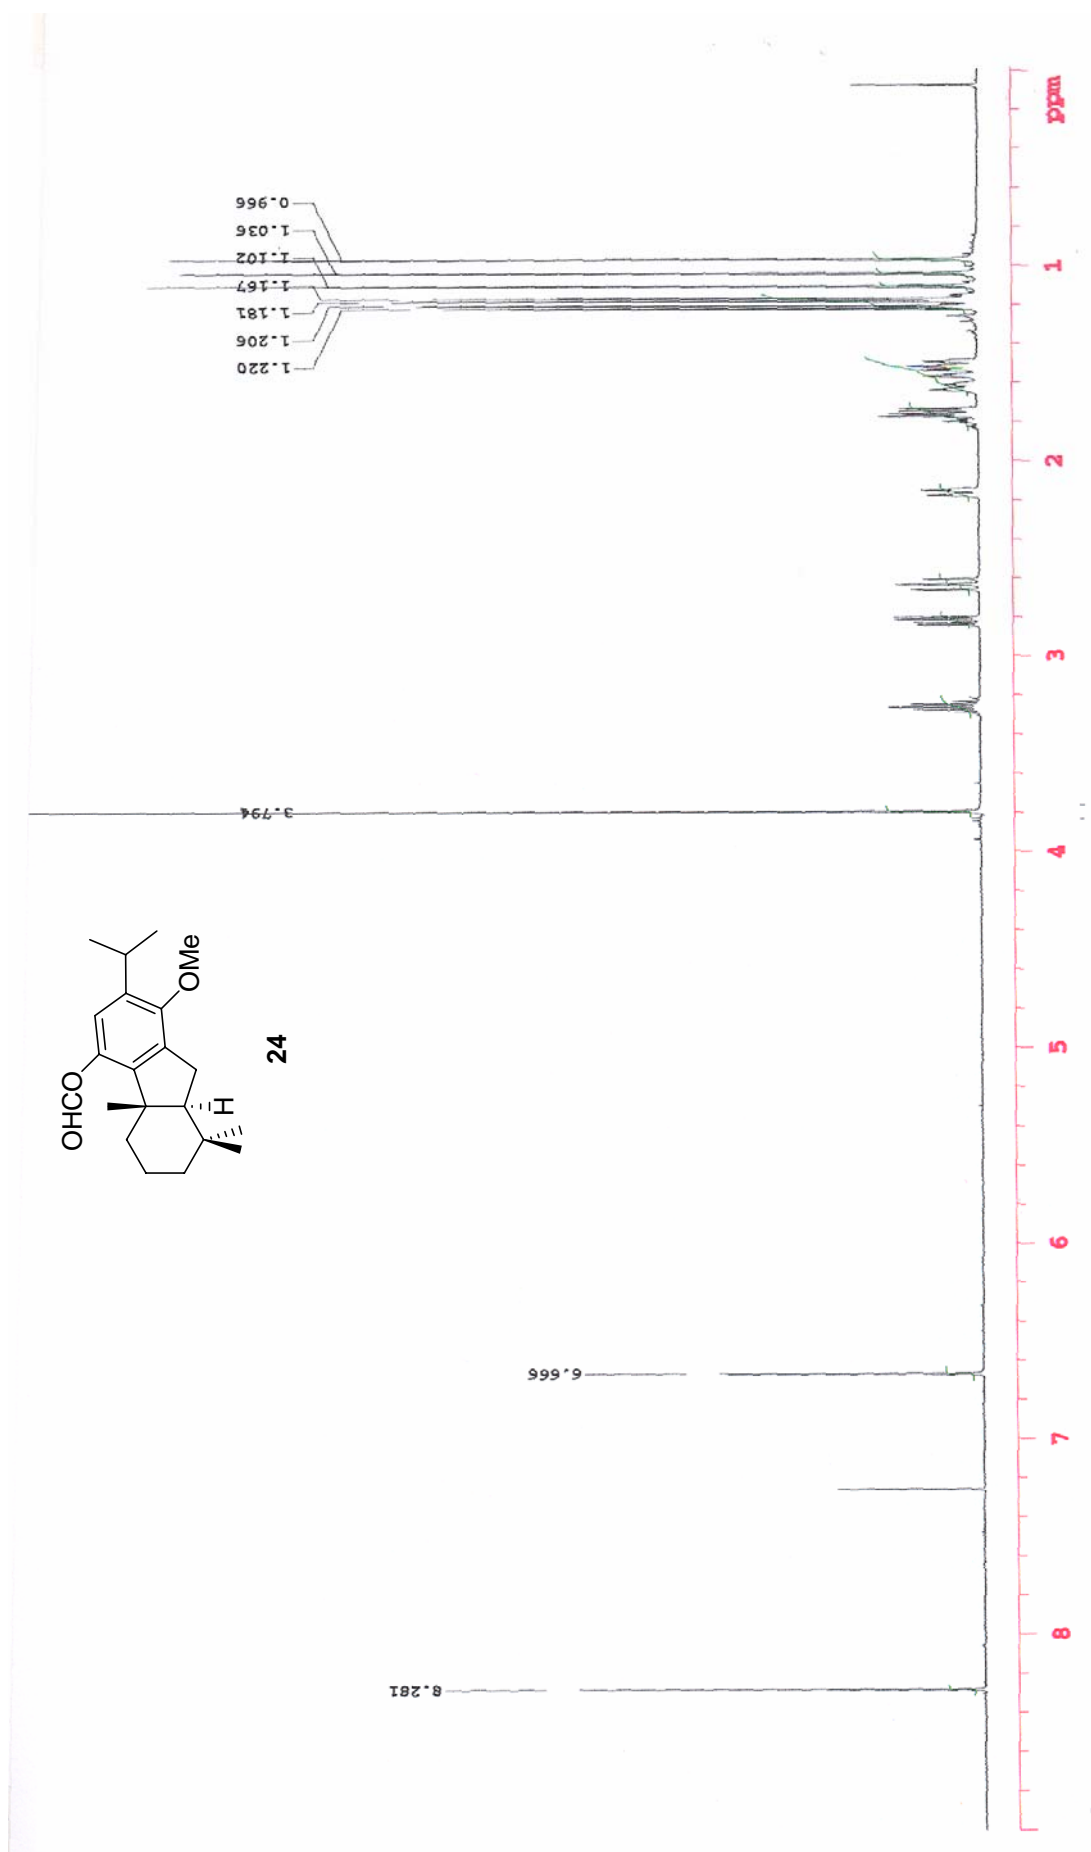

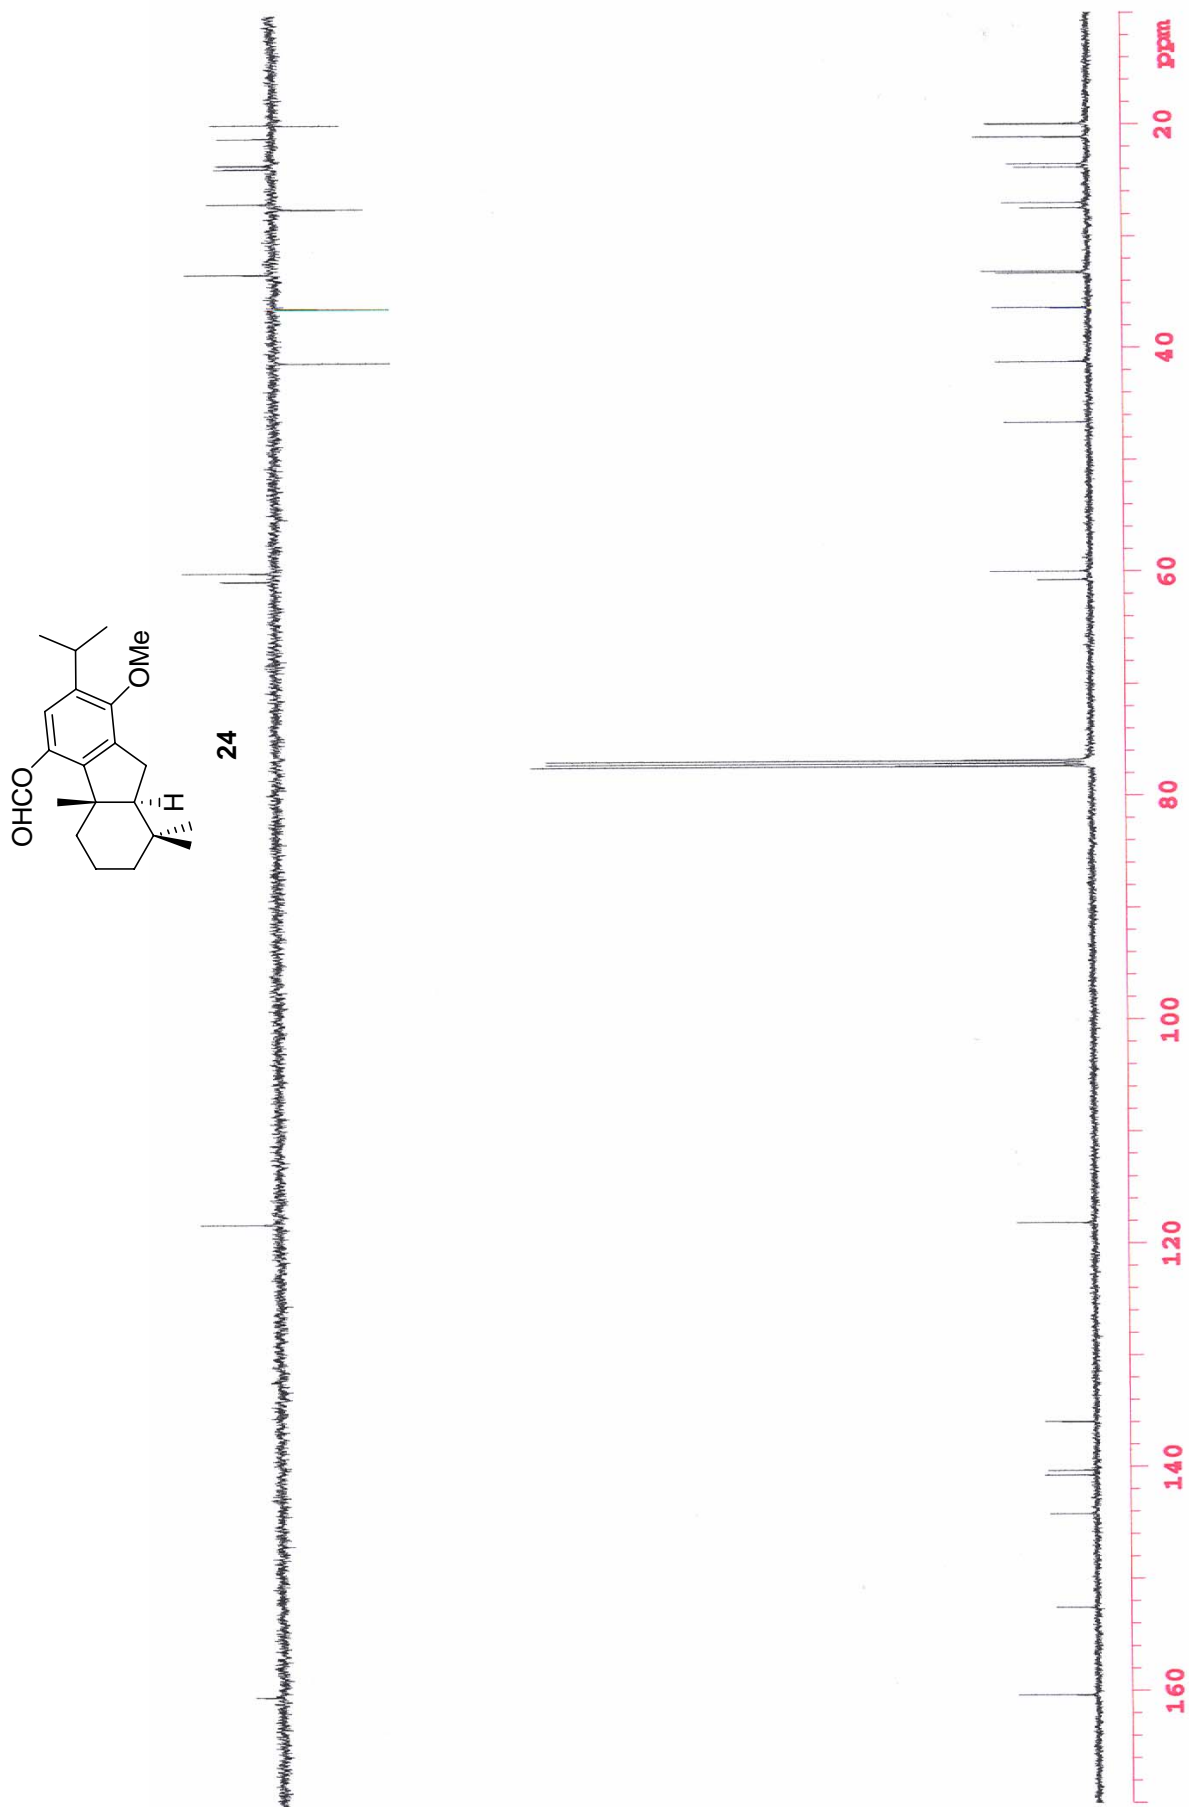

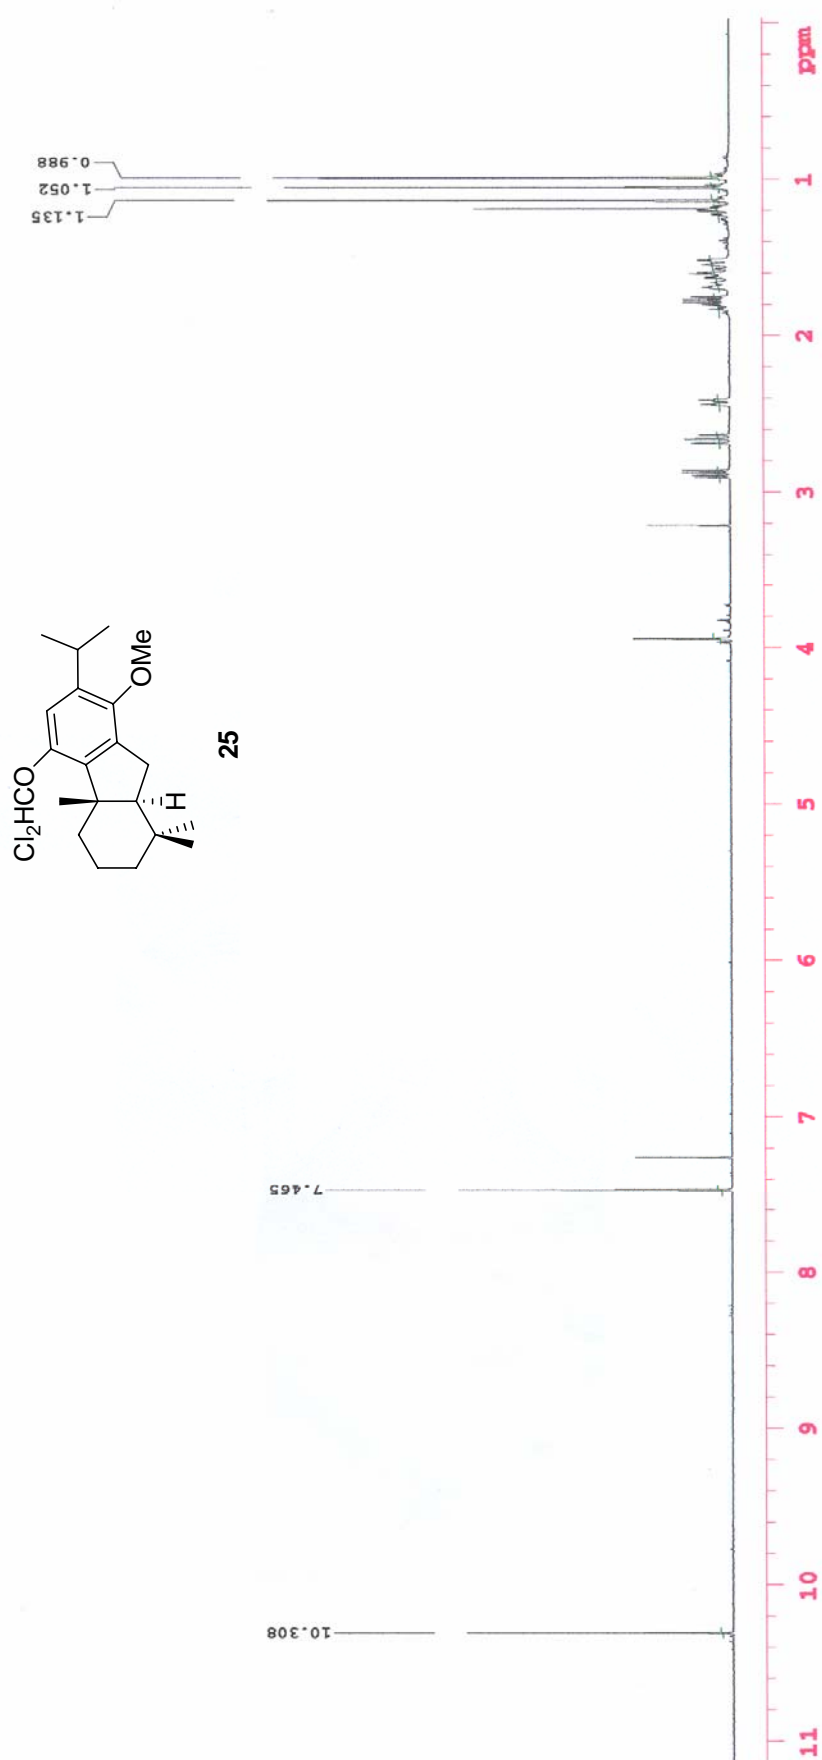



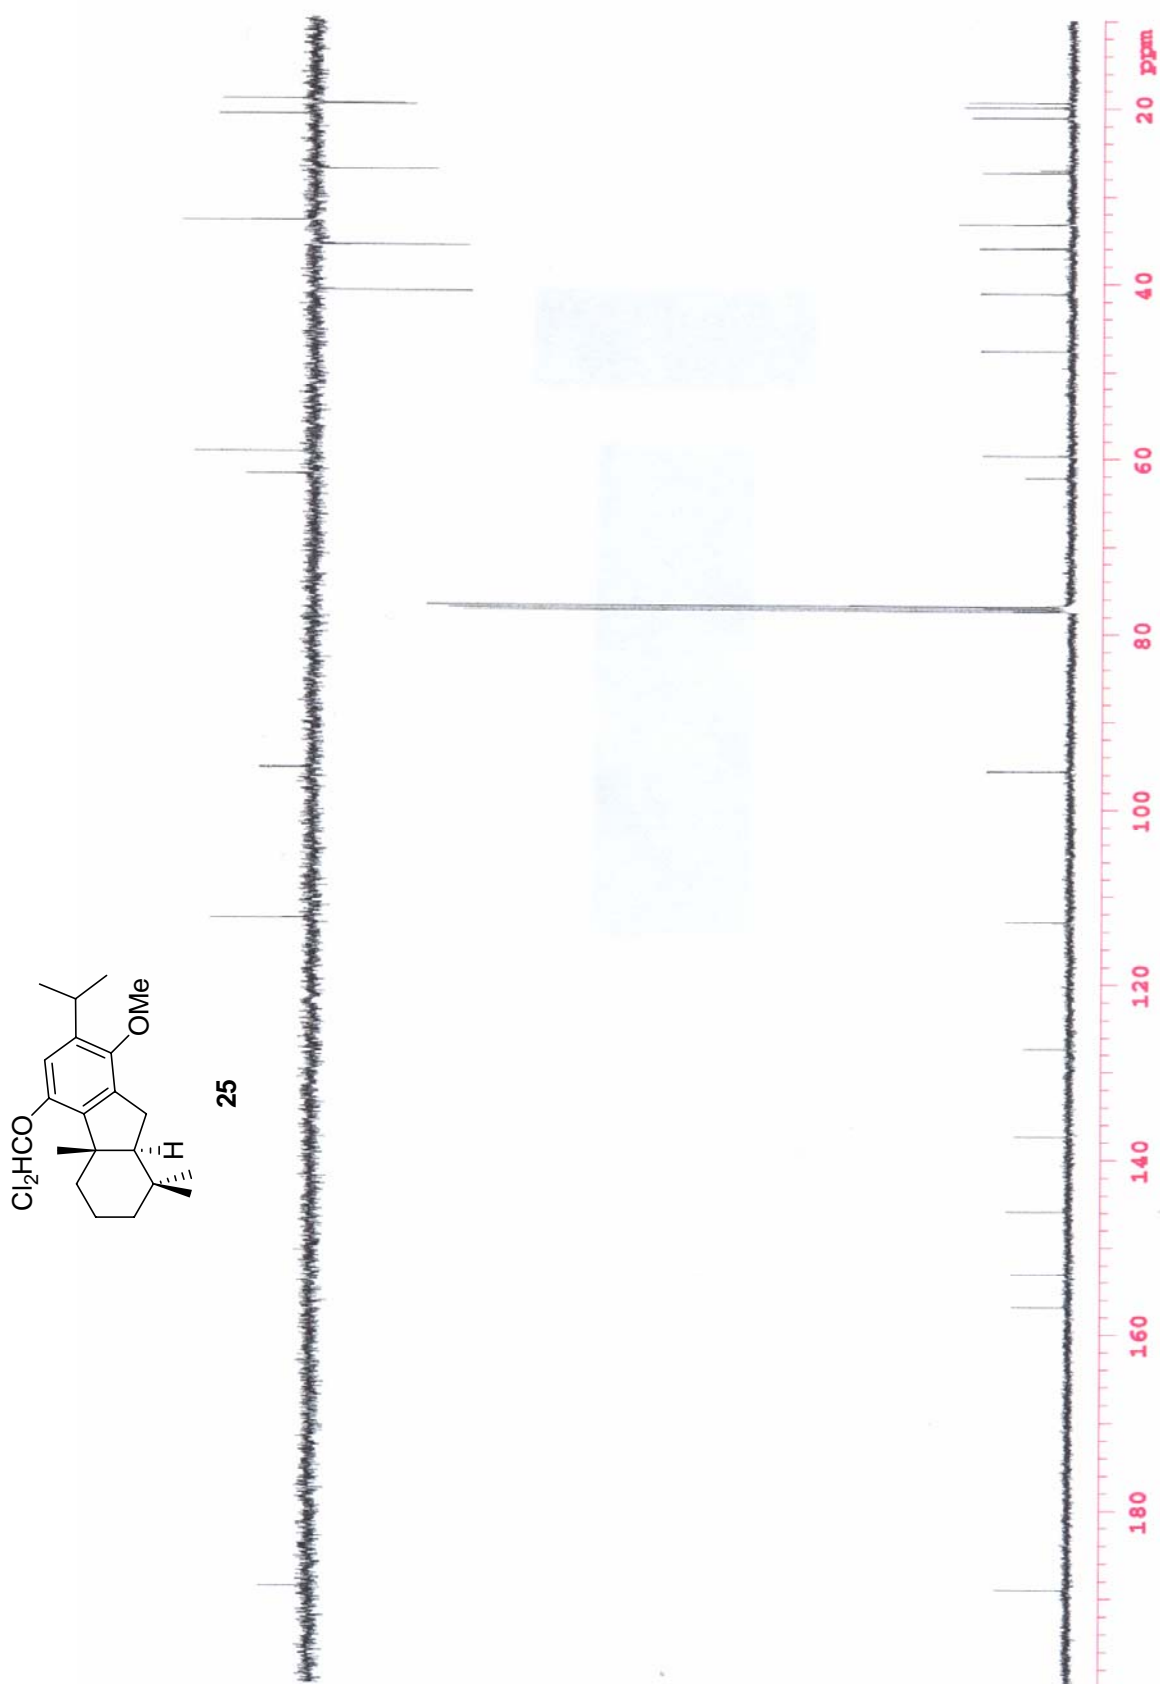

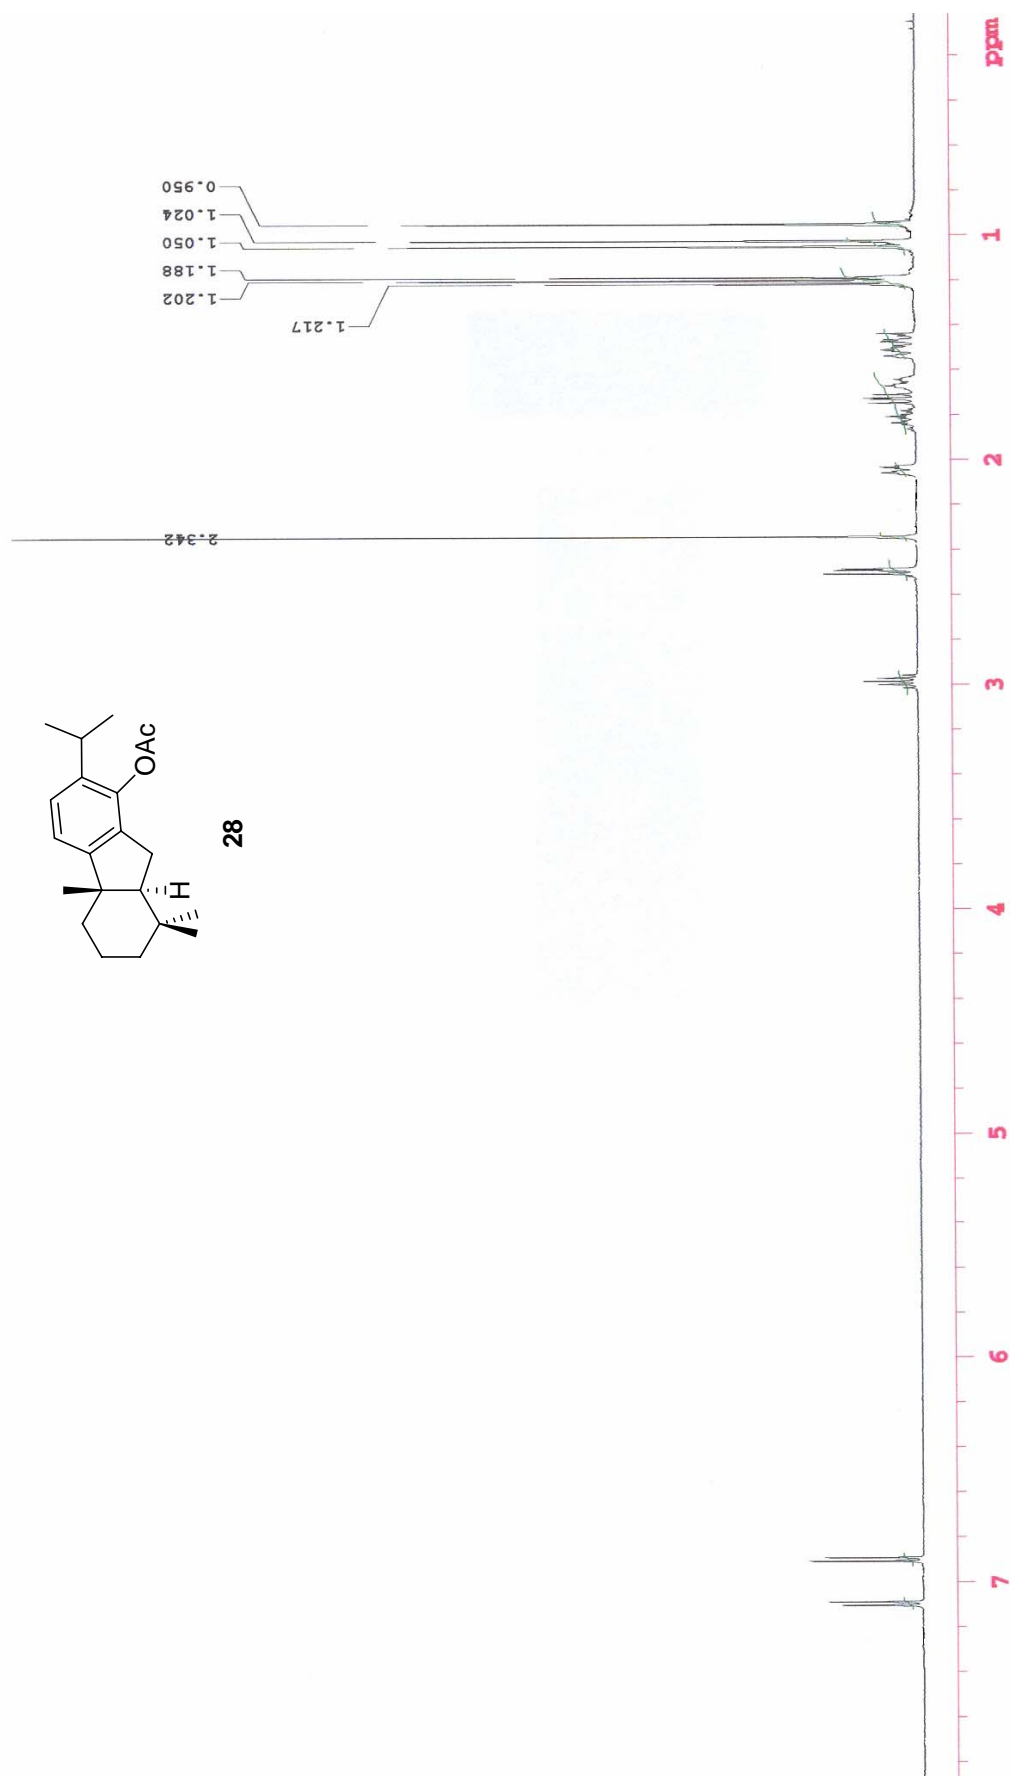

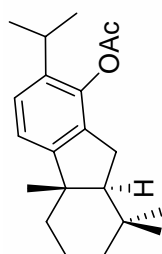

28

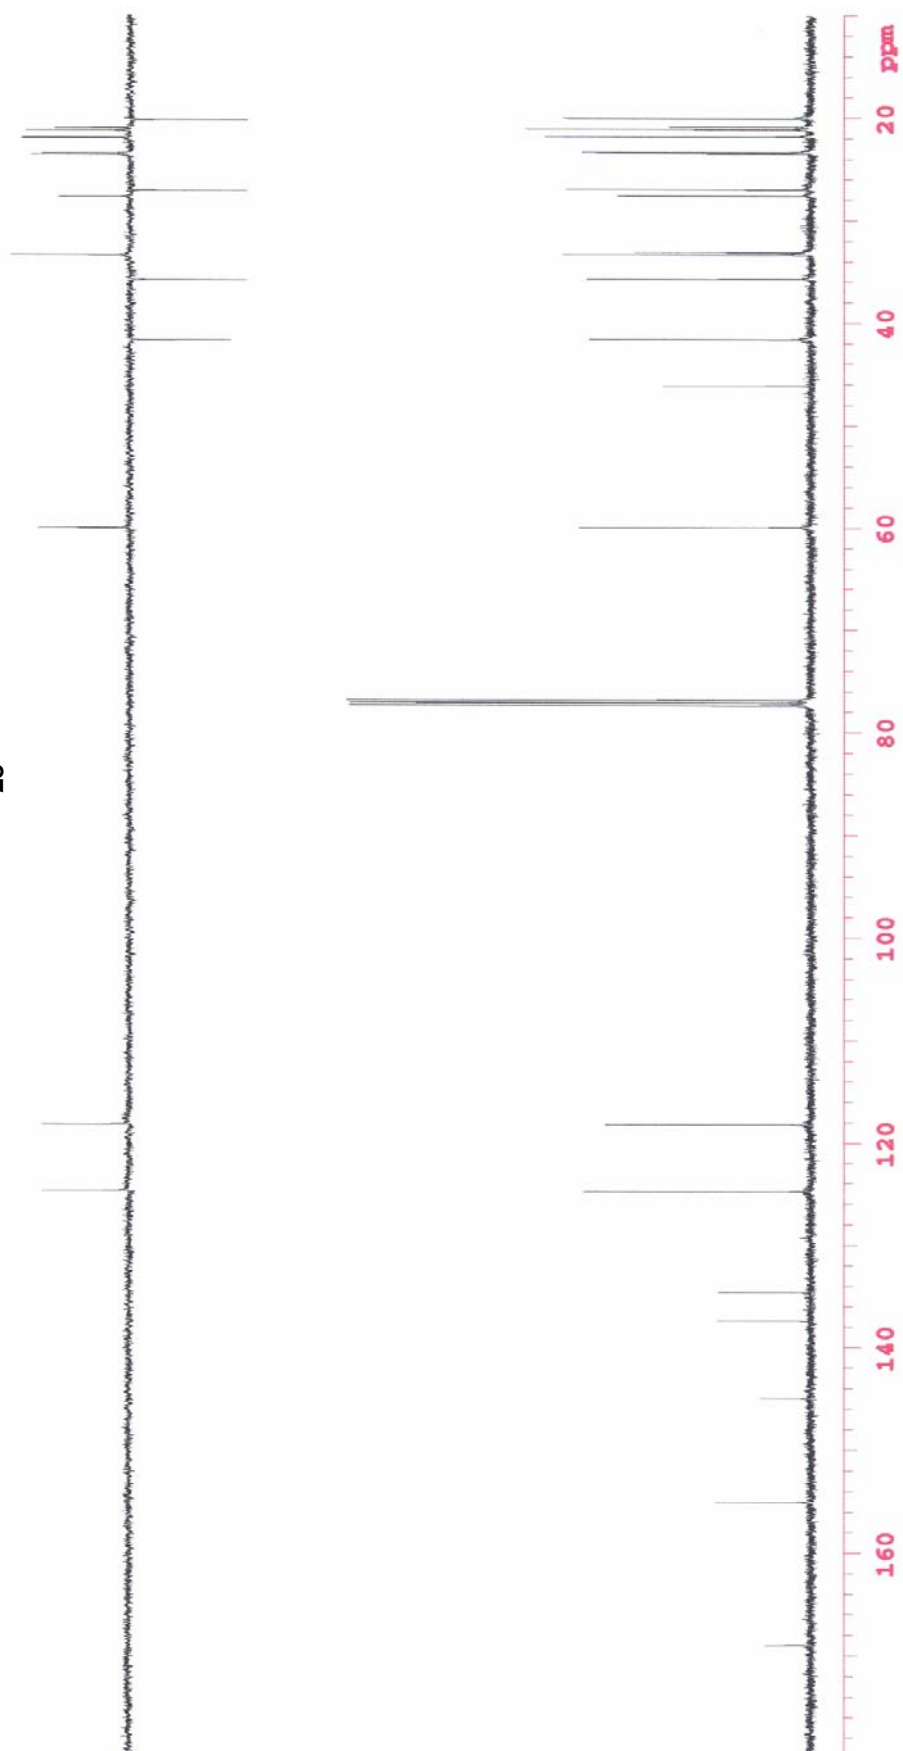

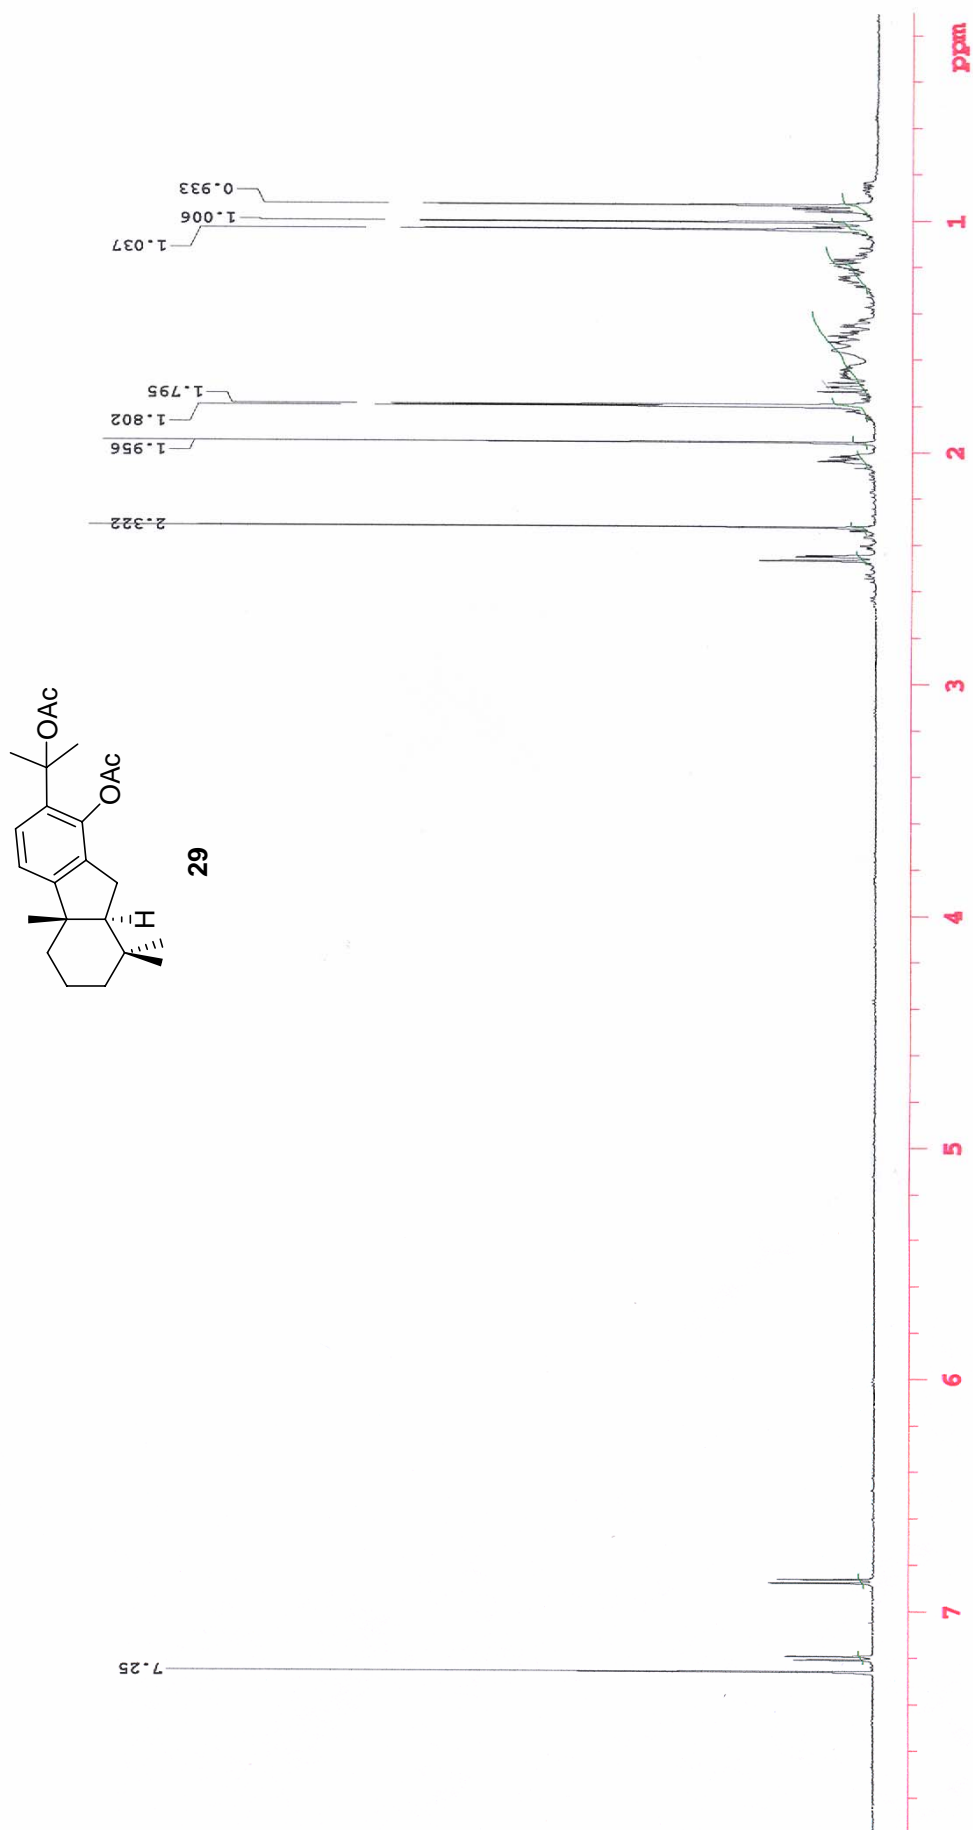

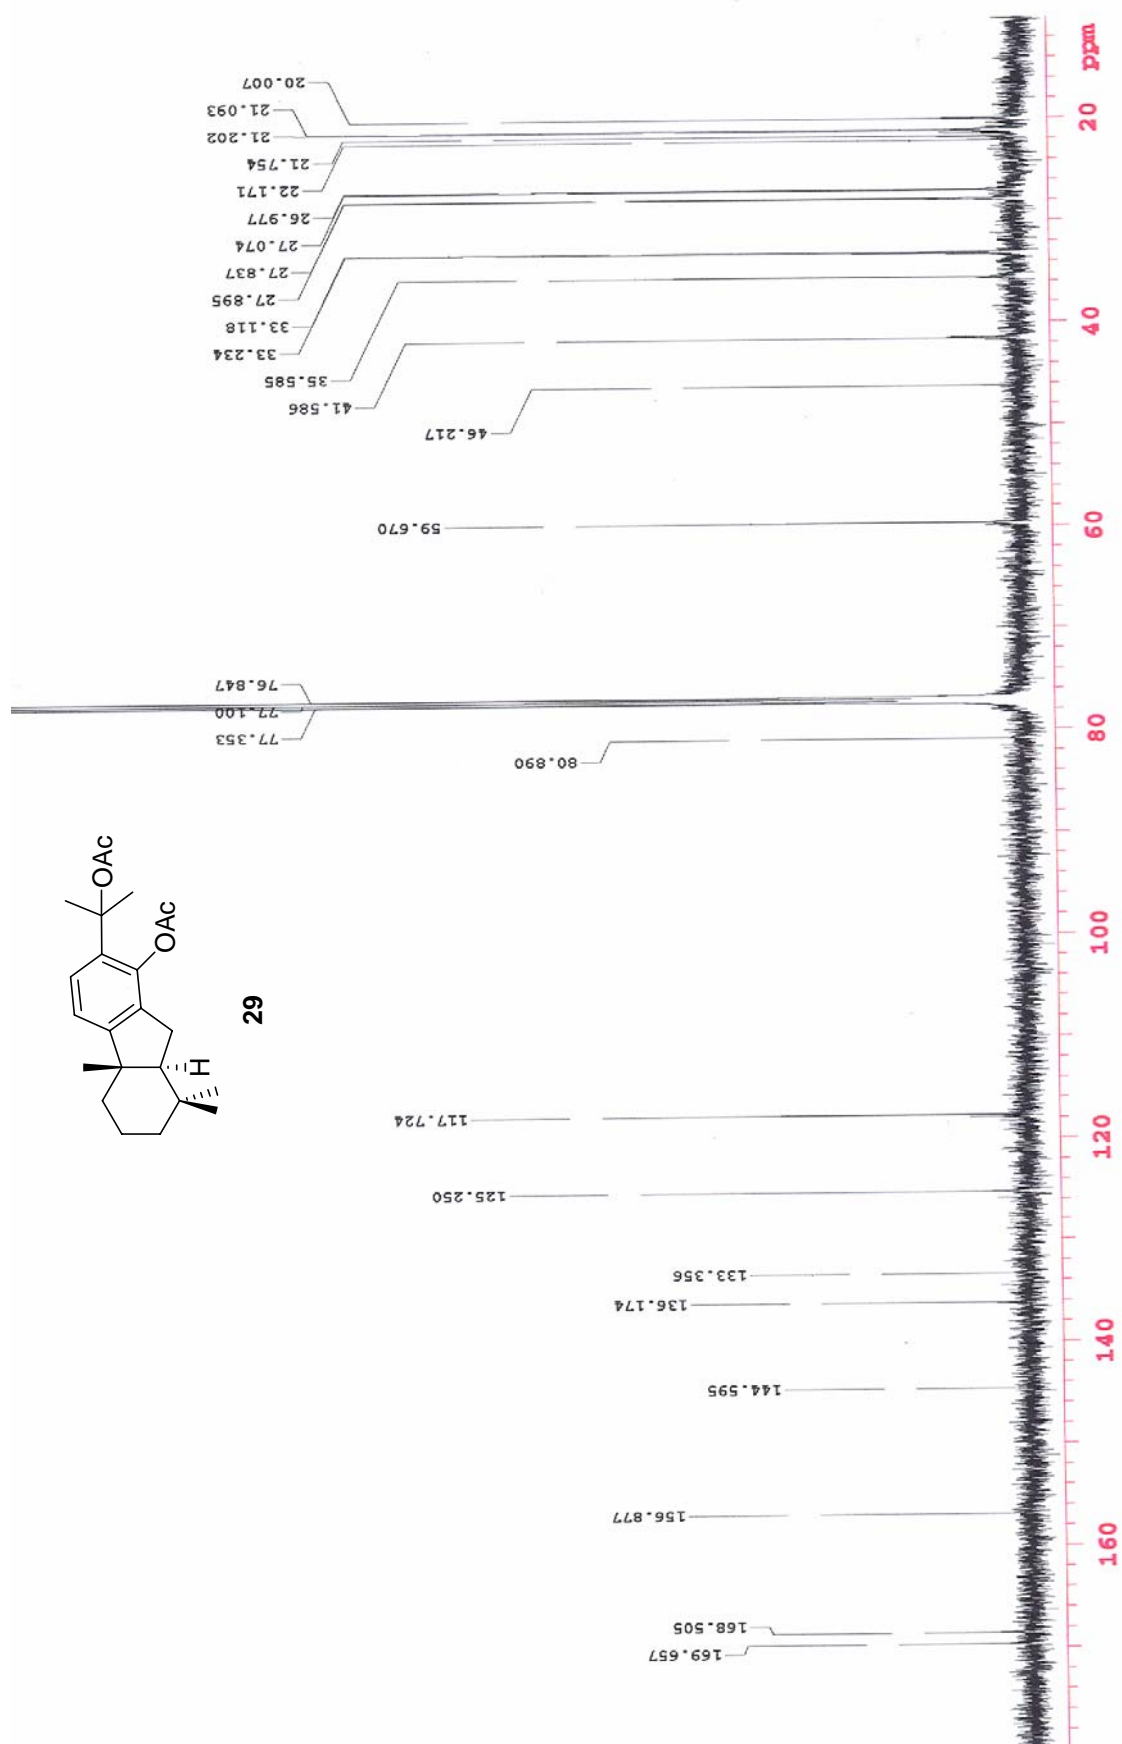

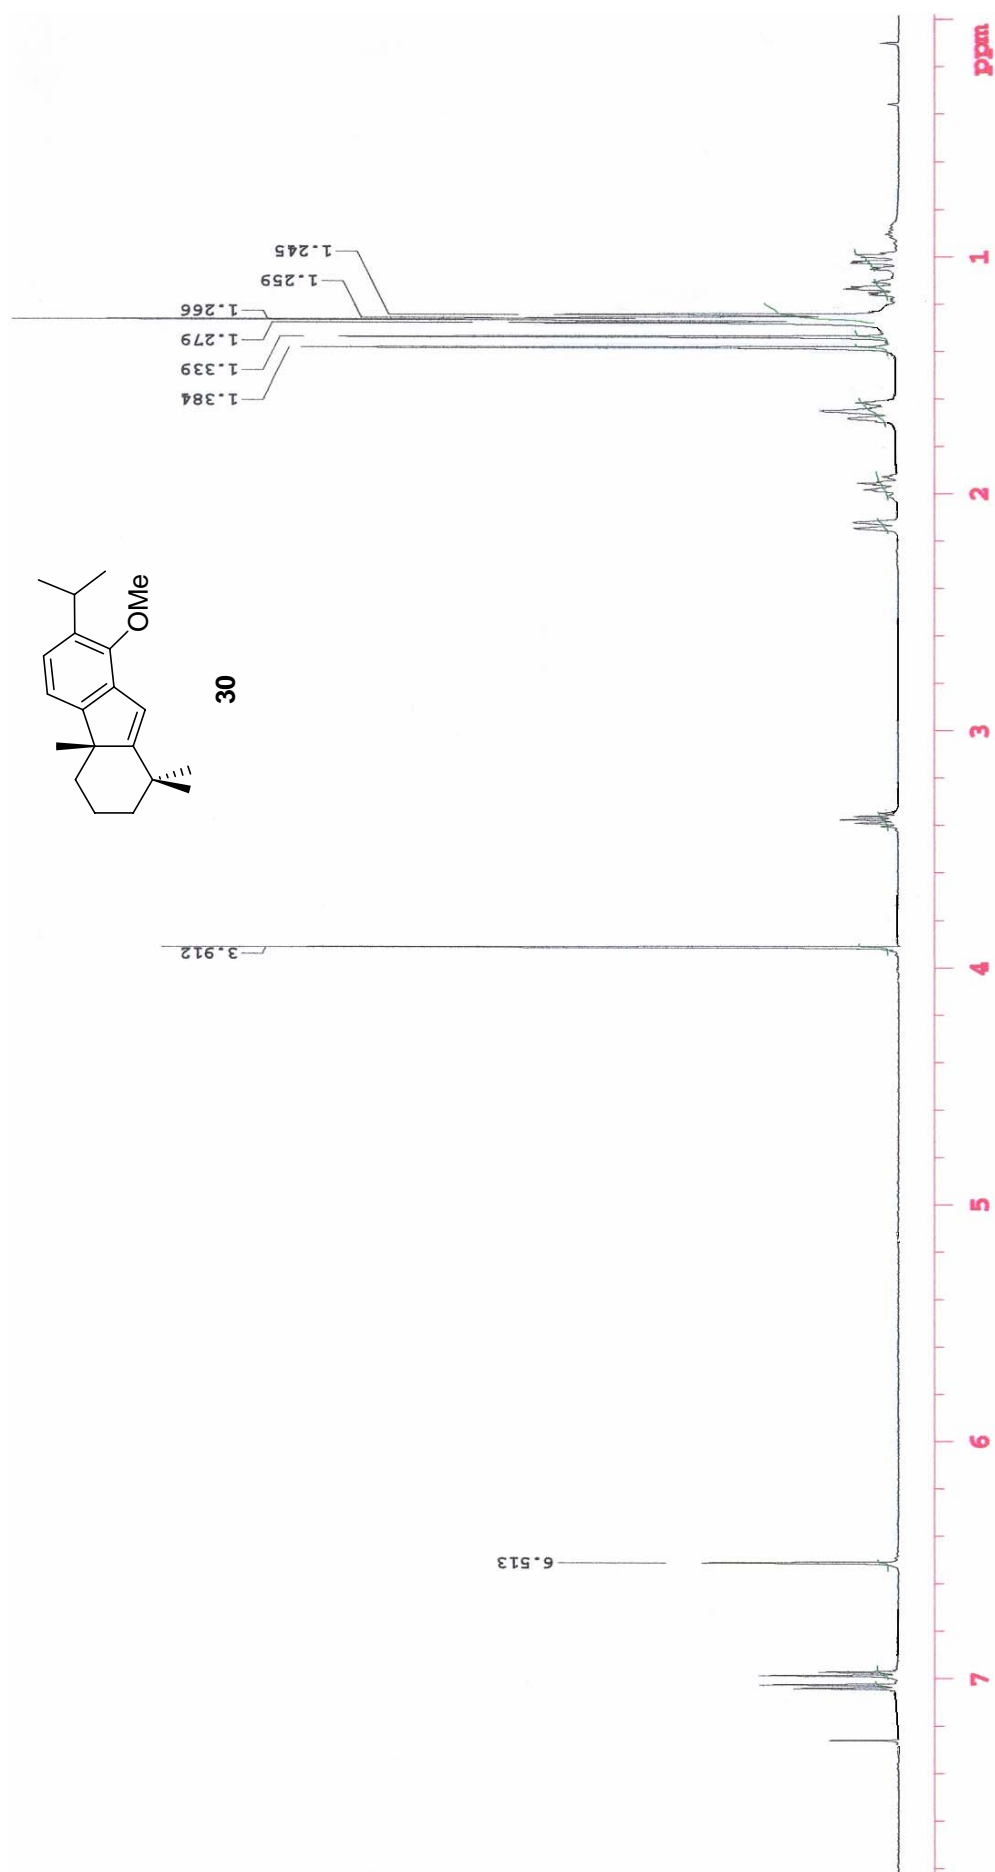

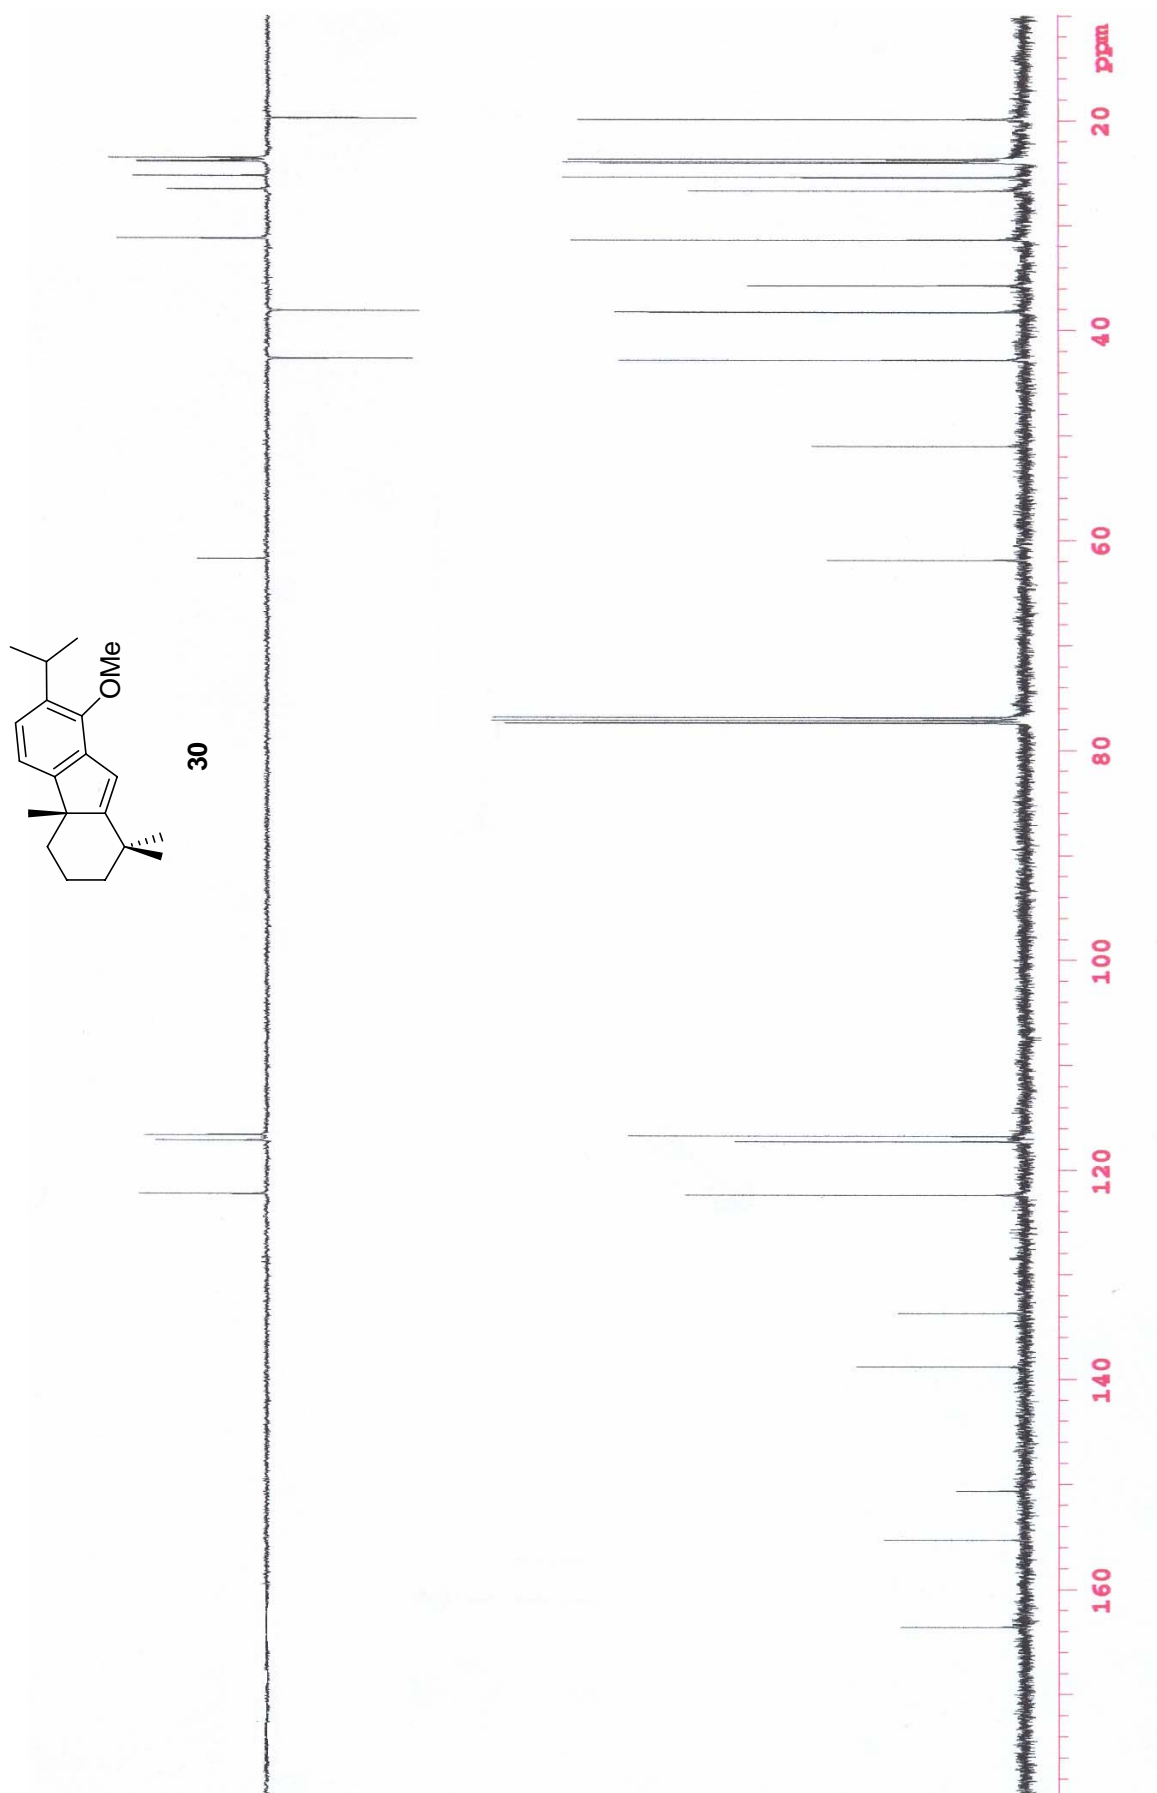

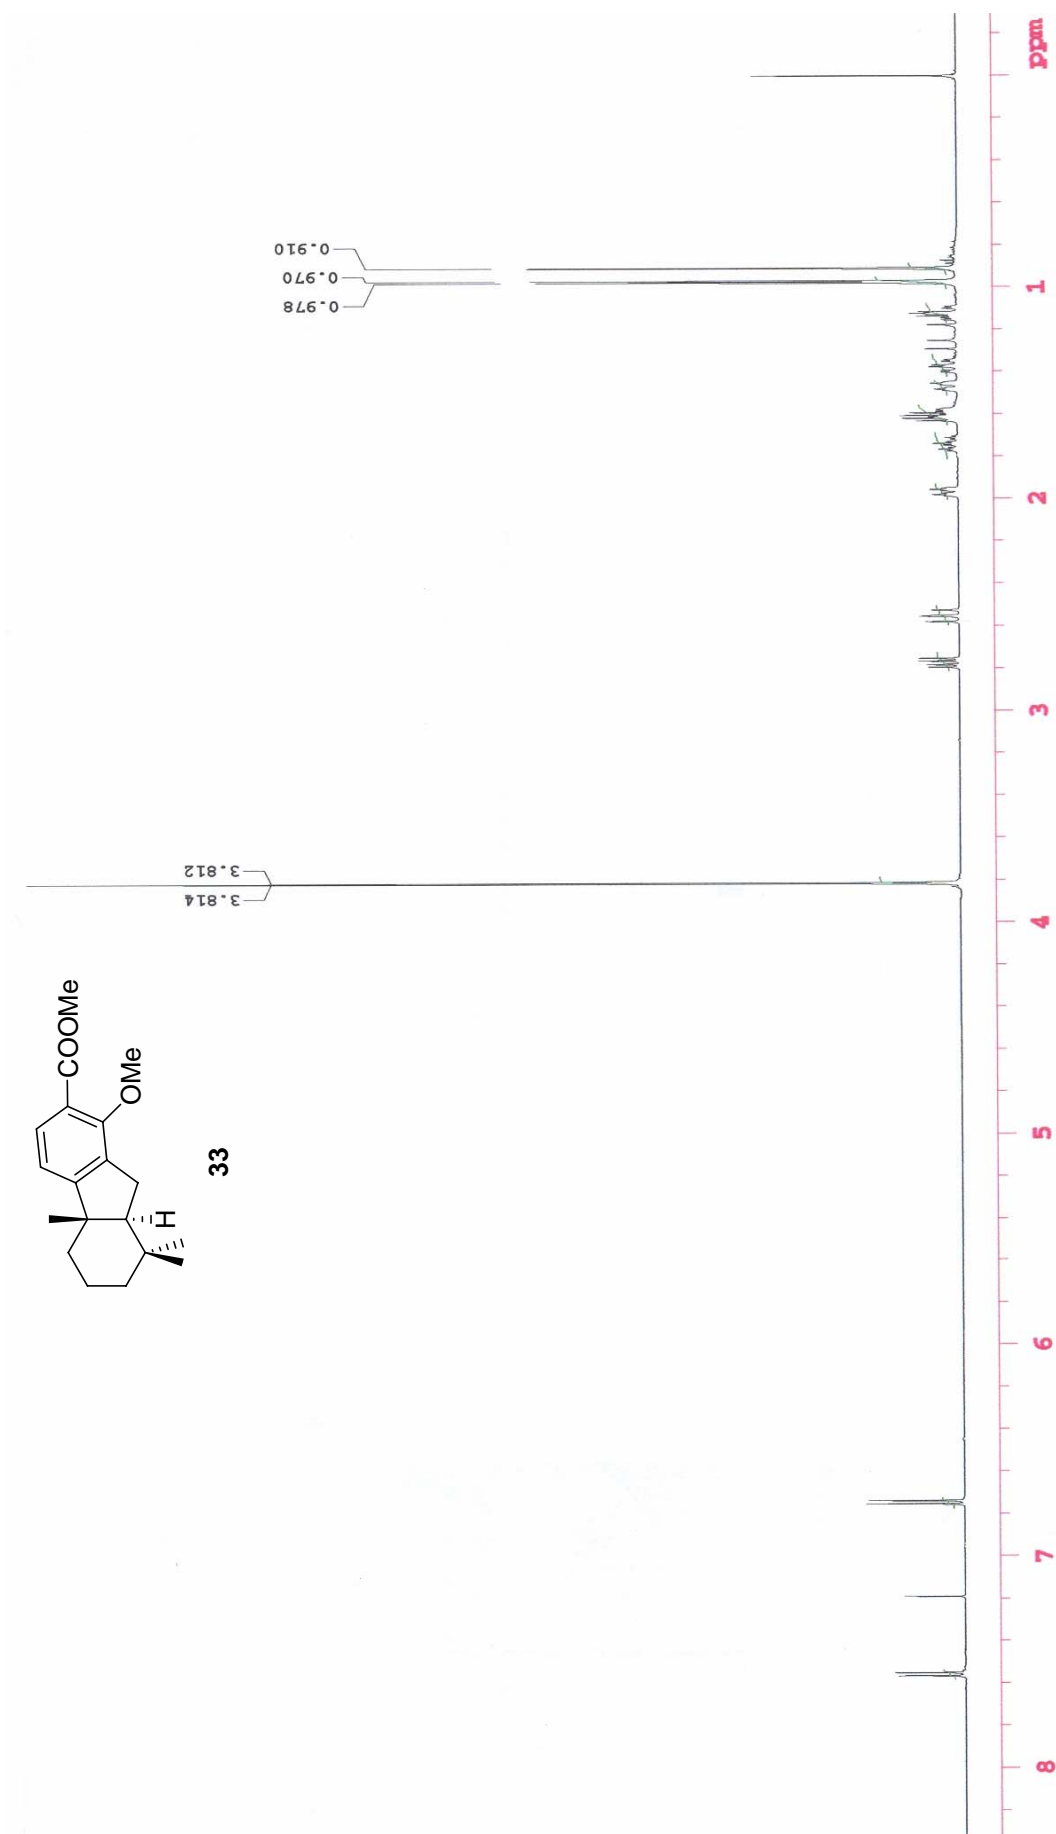



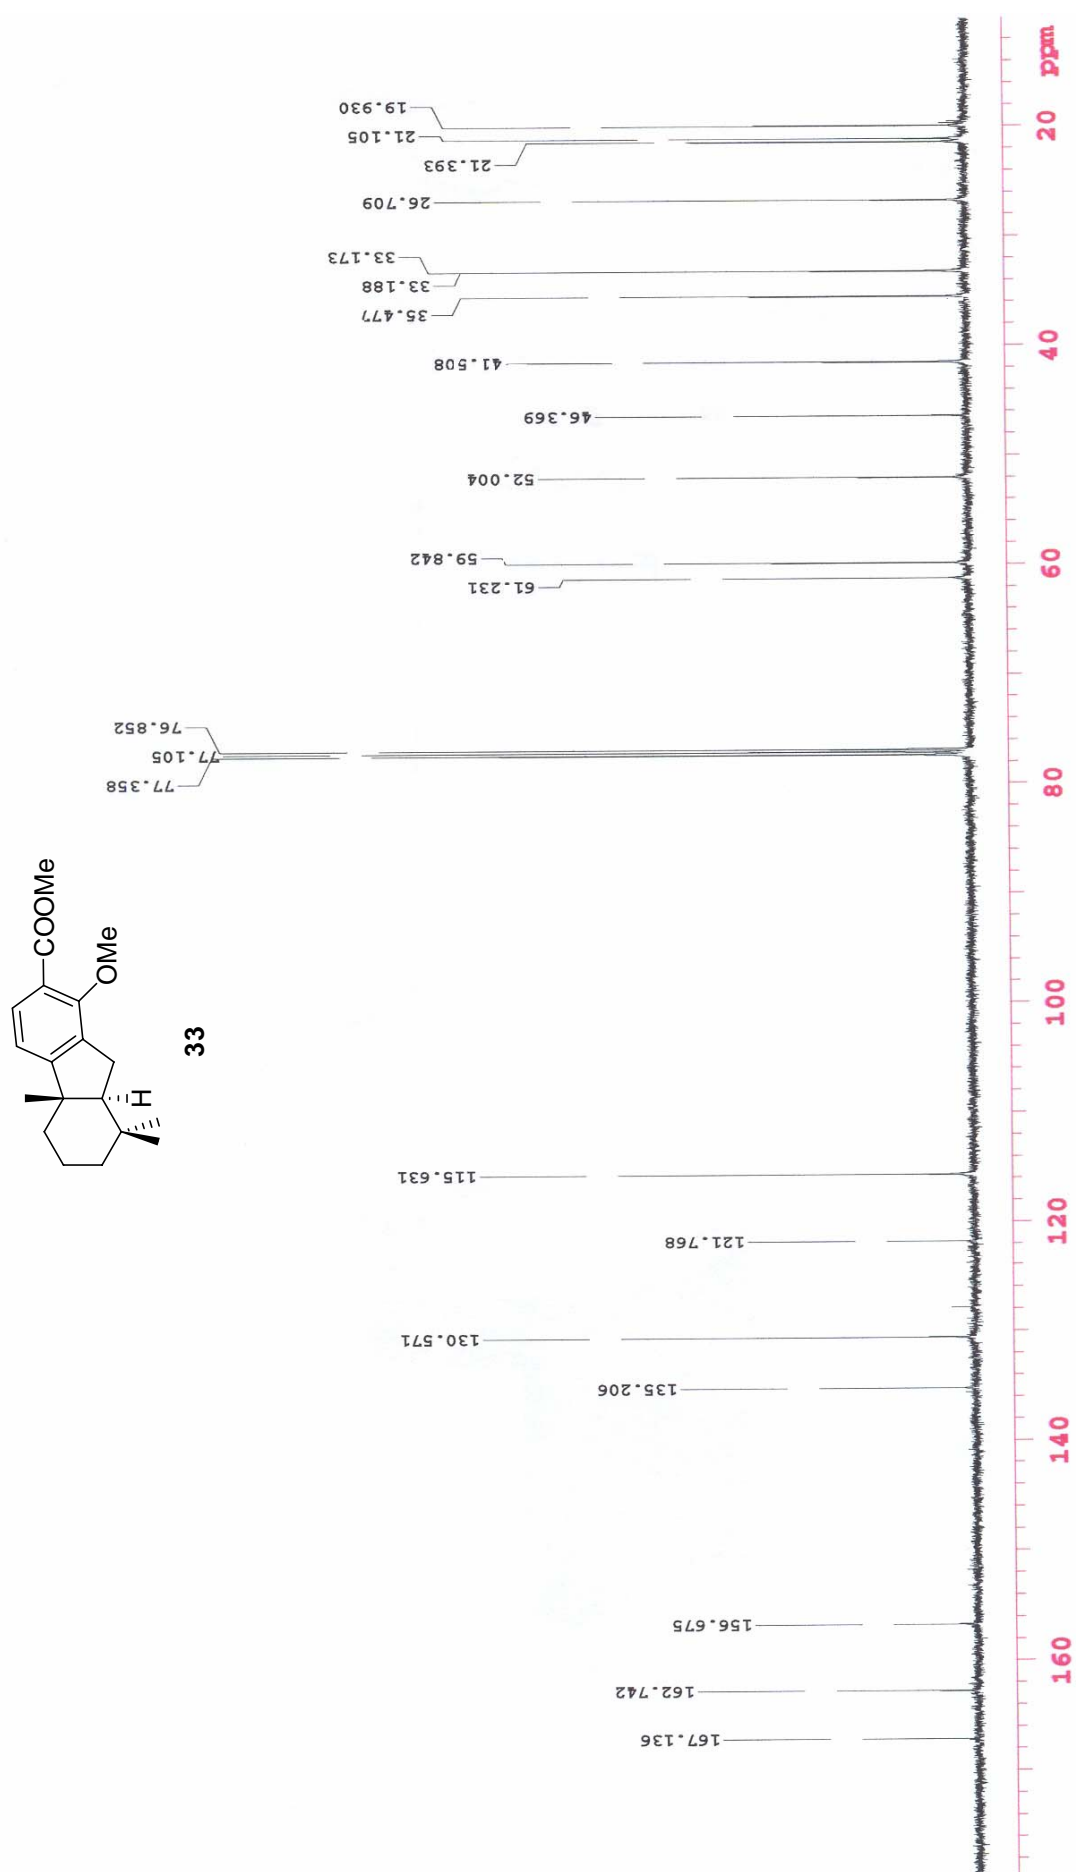

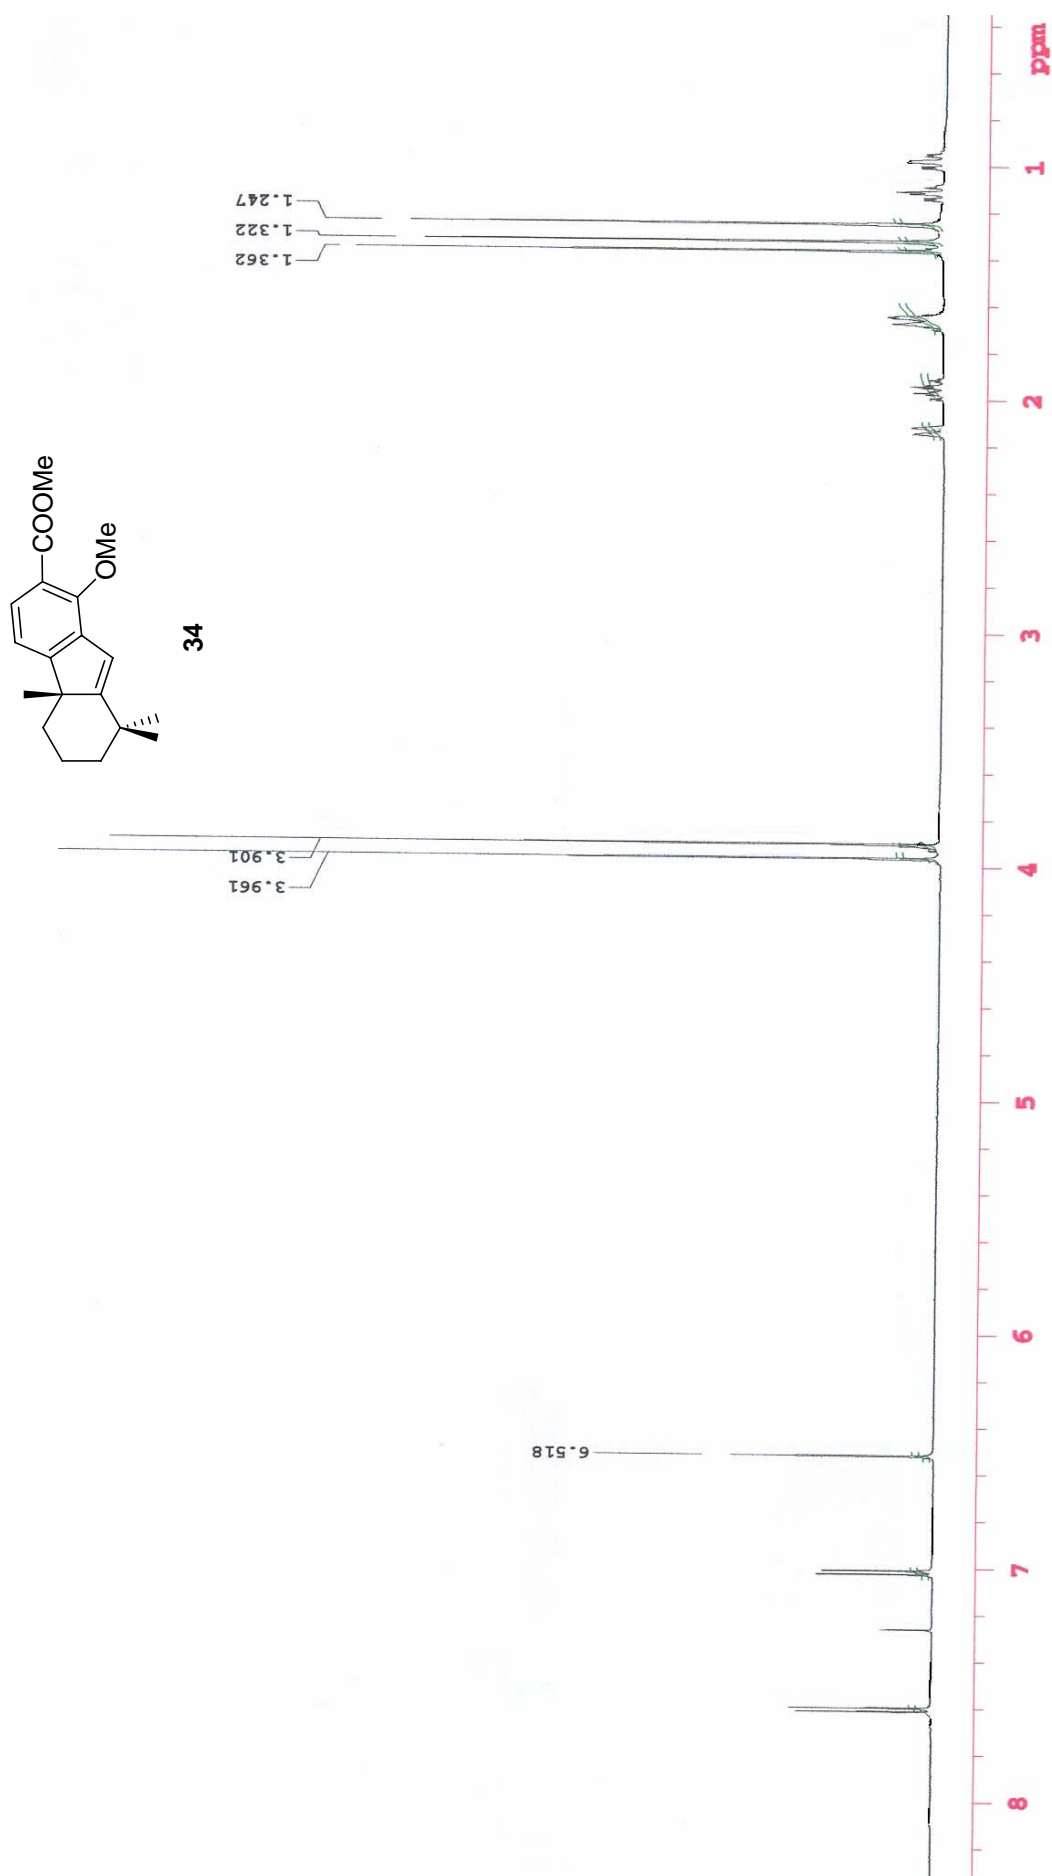

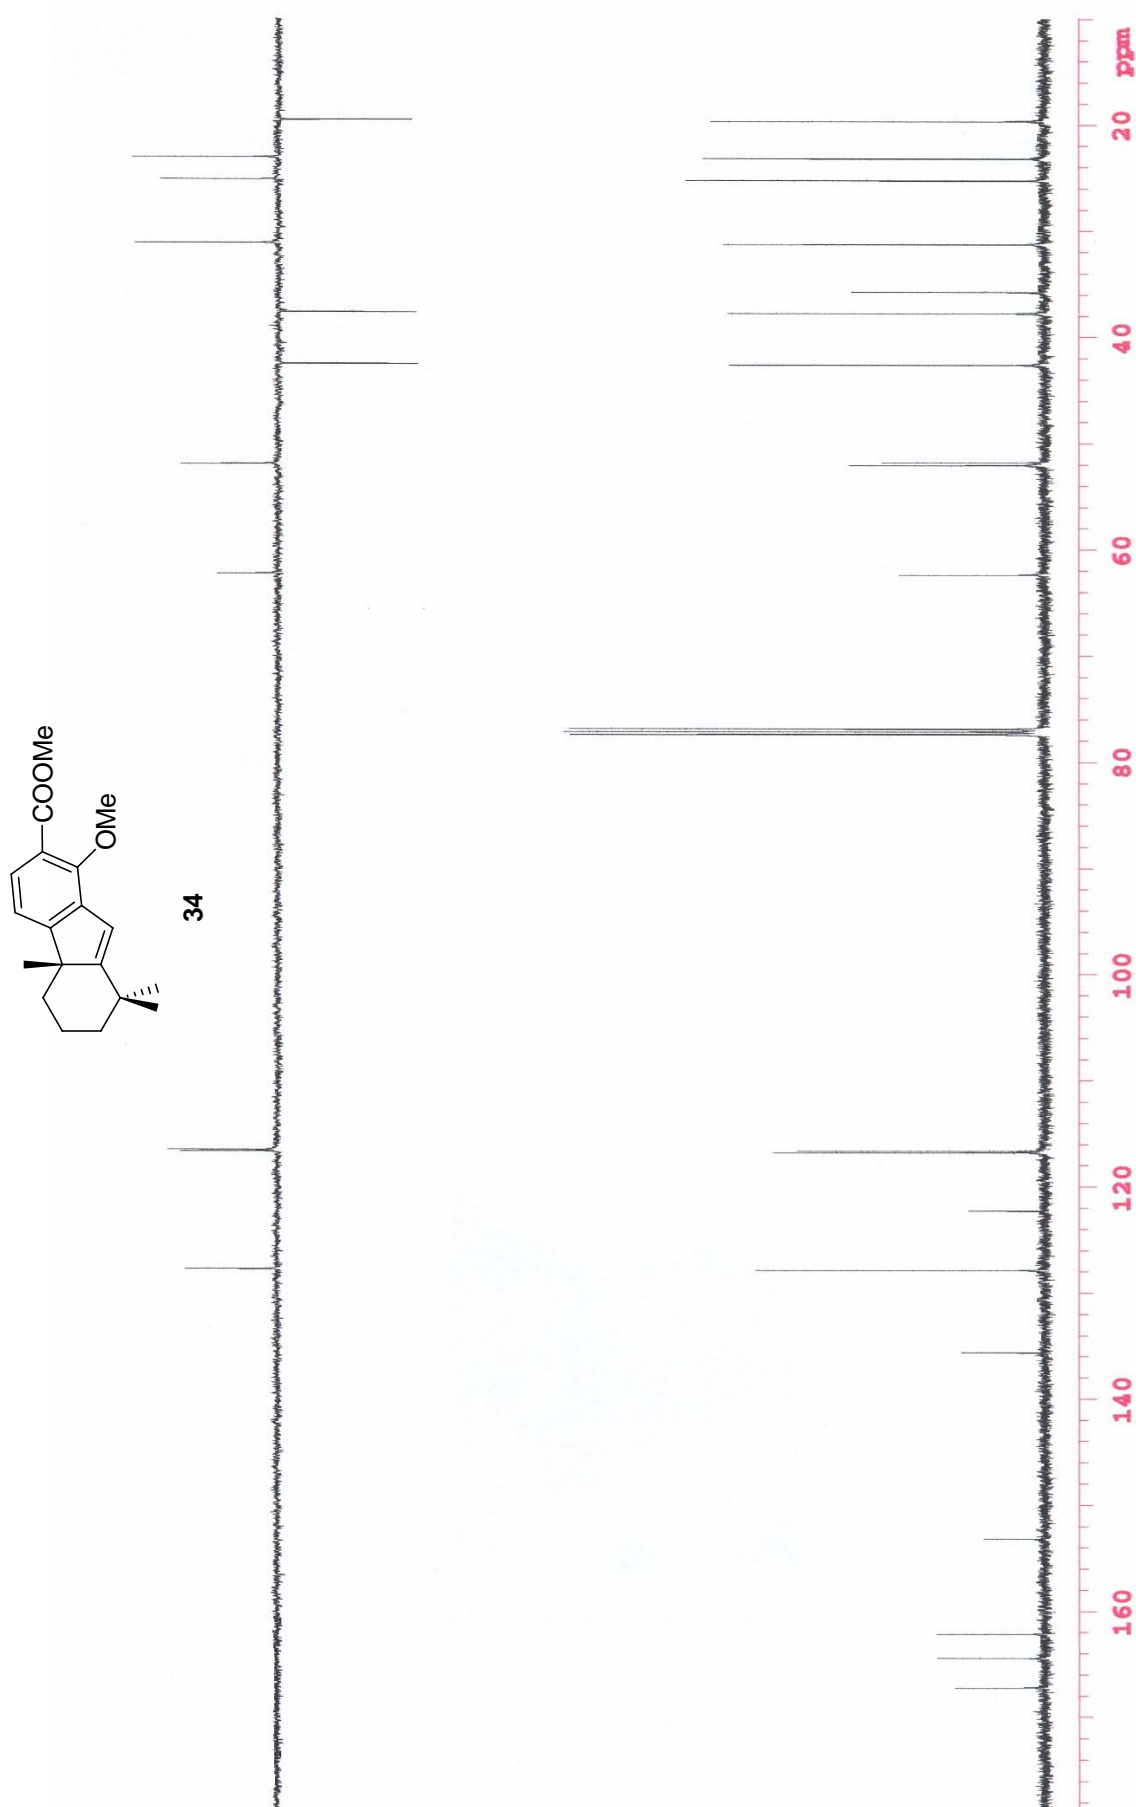

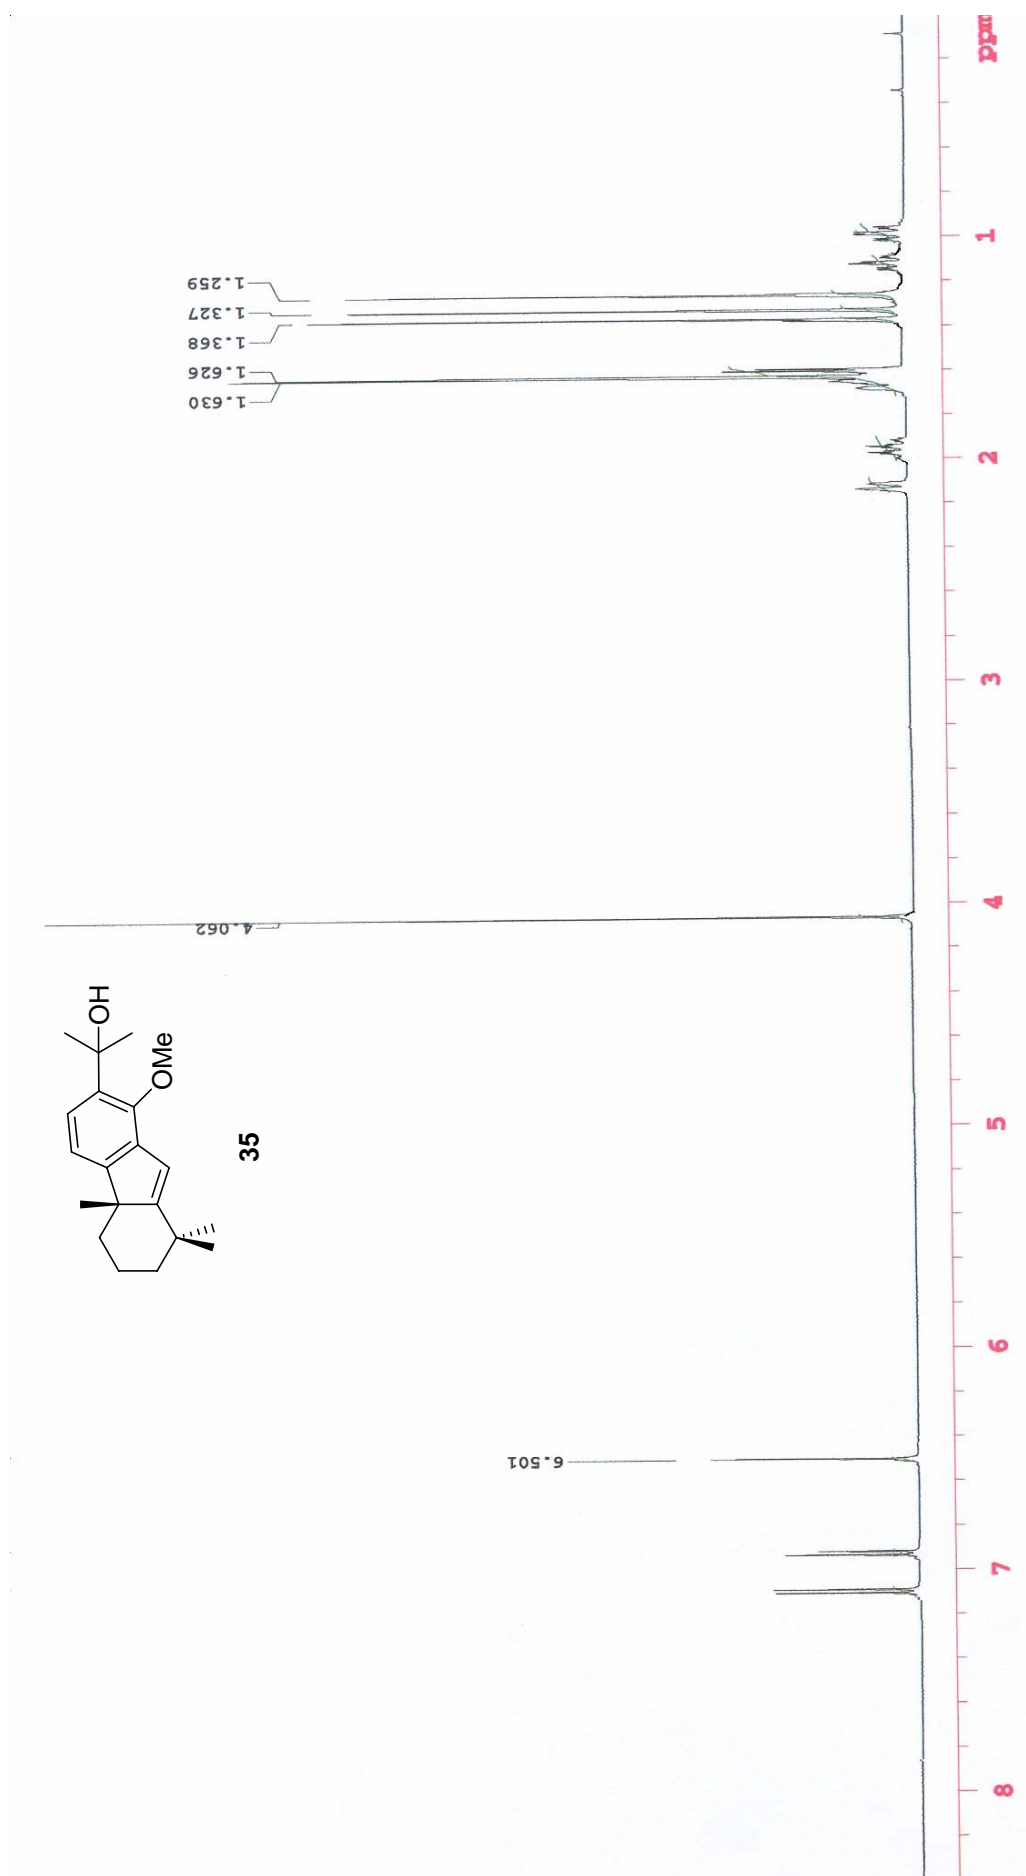

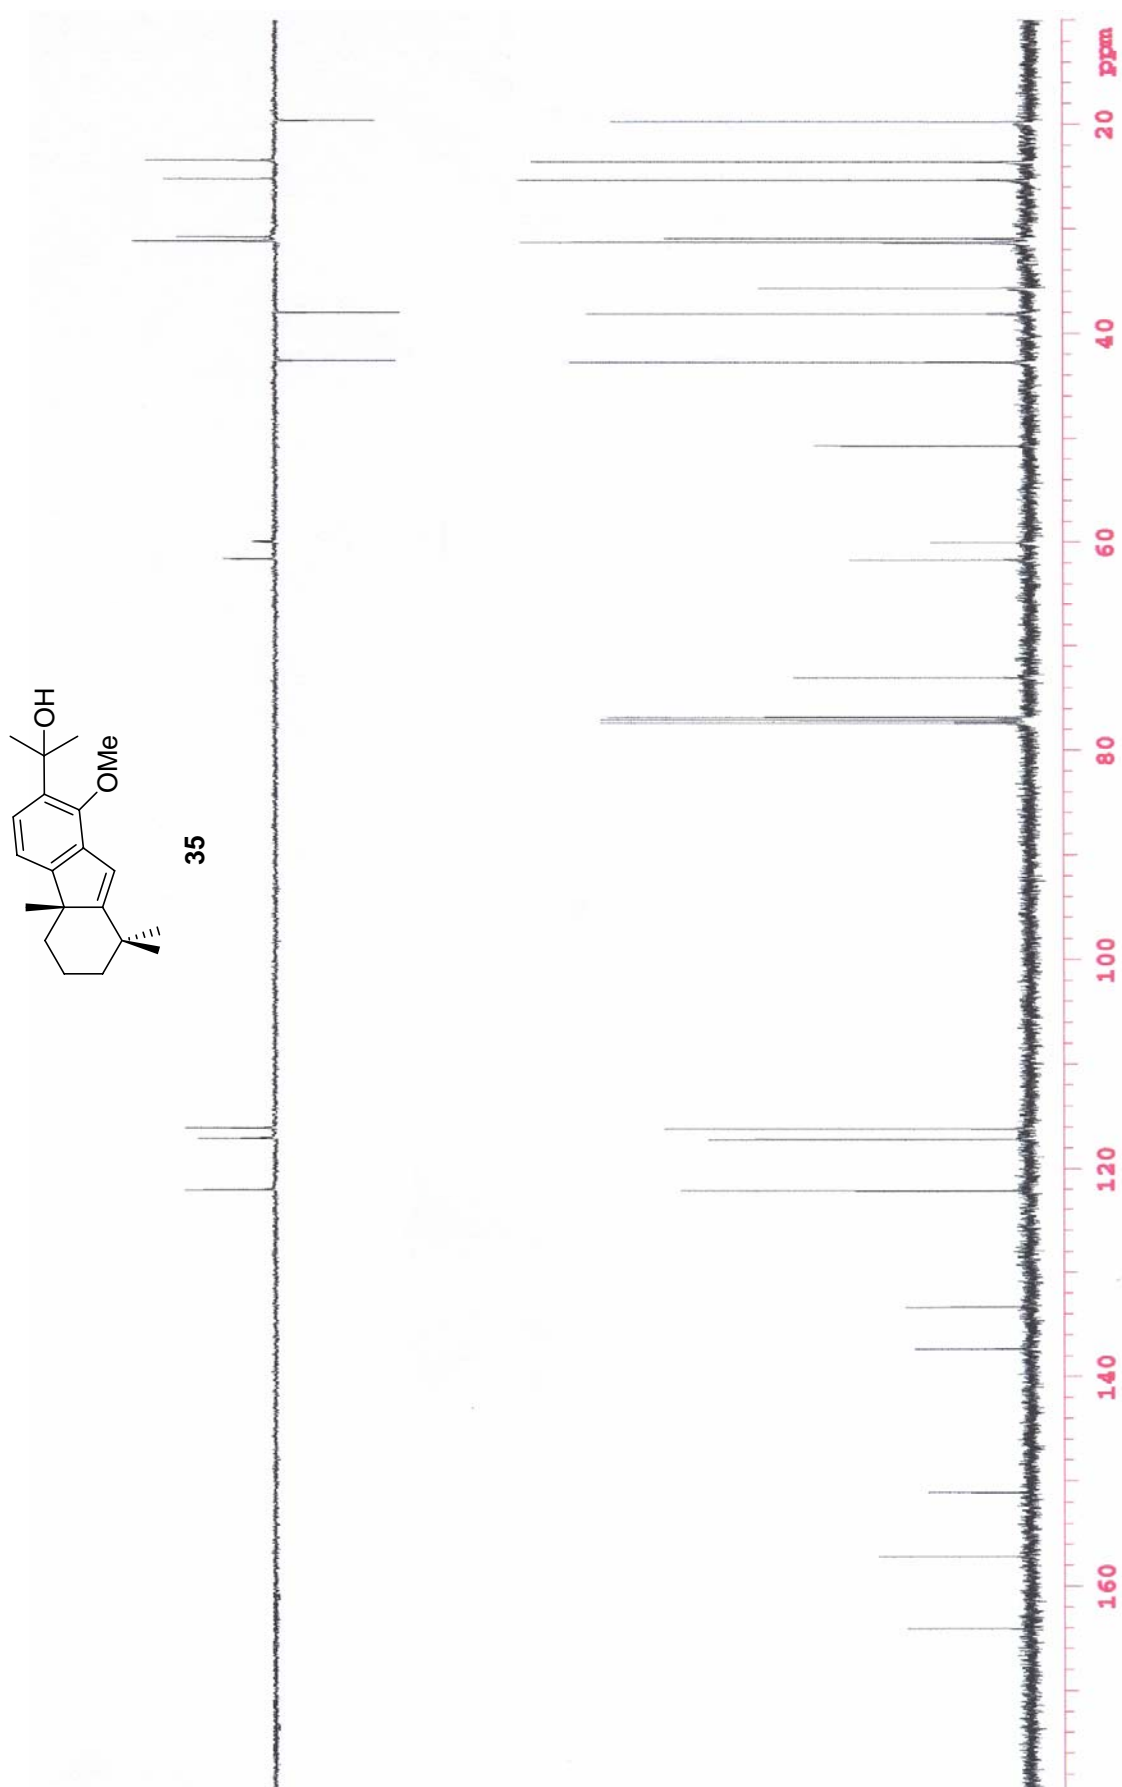

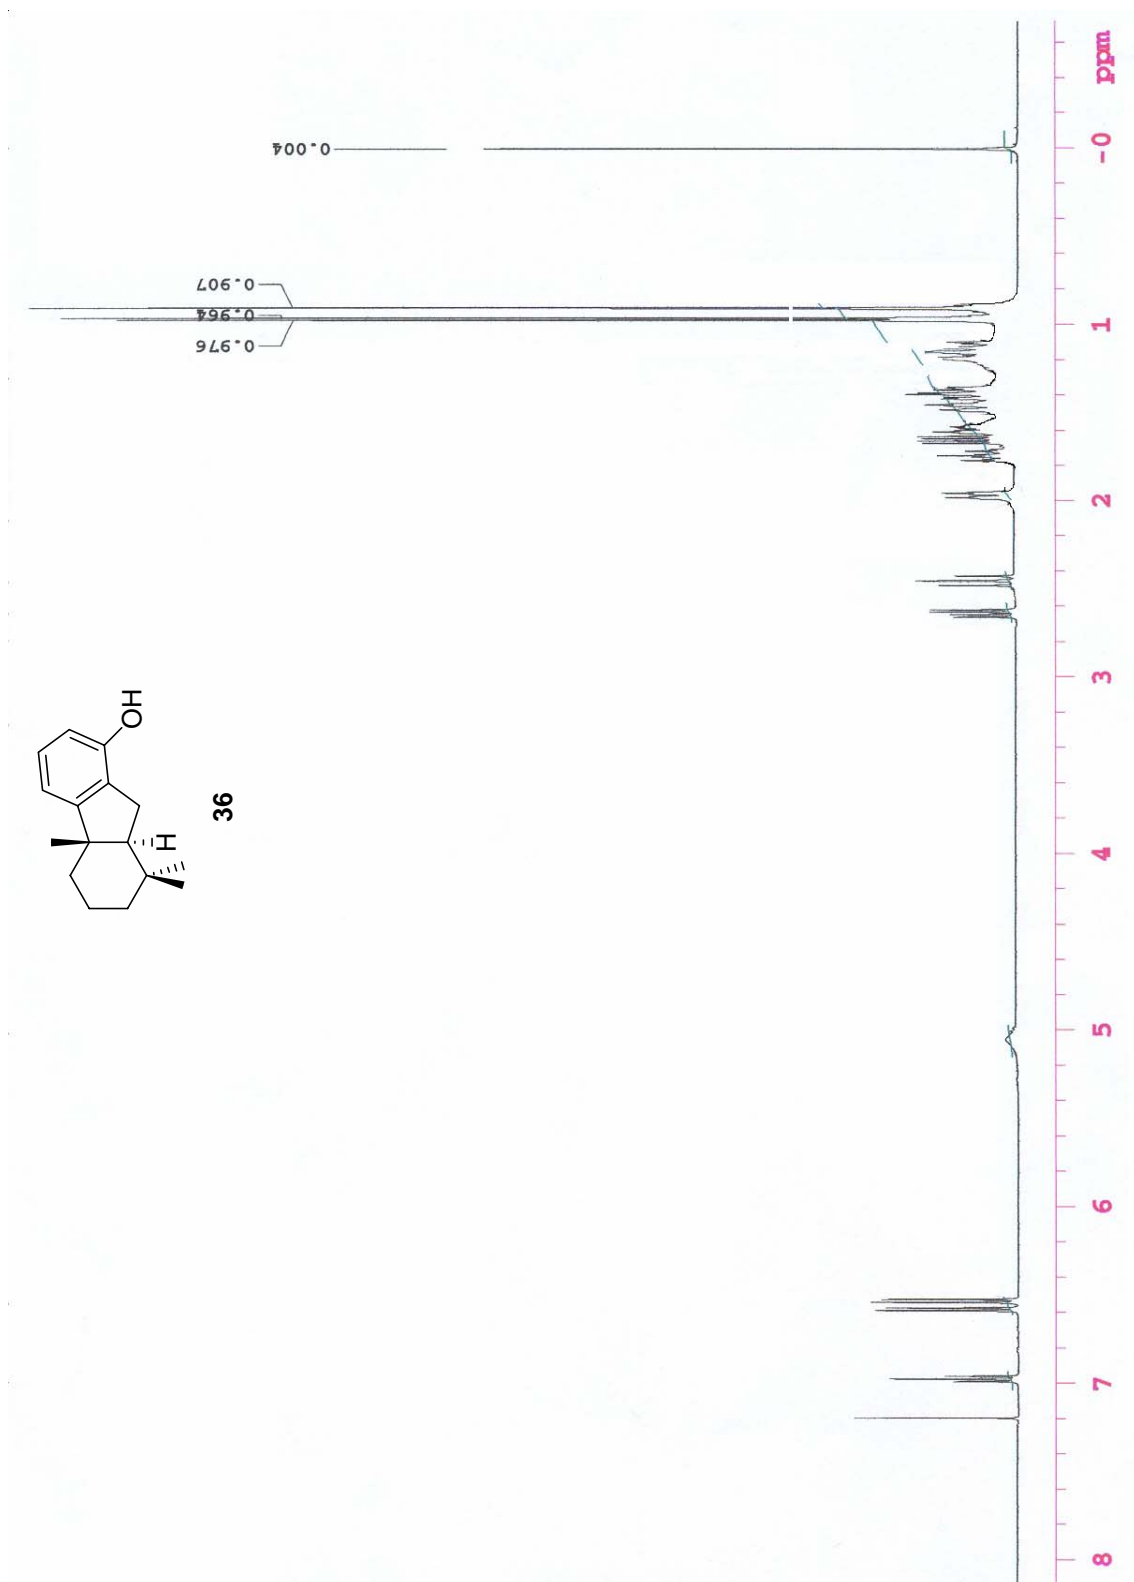

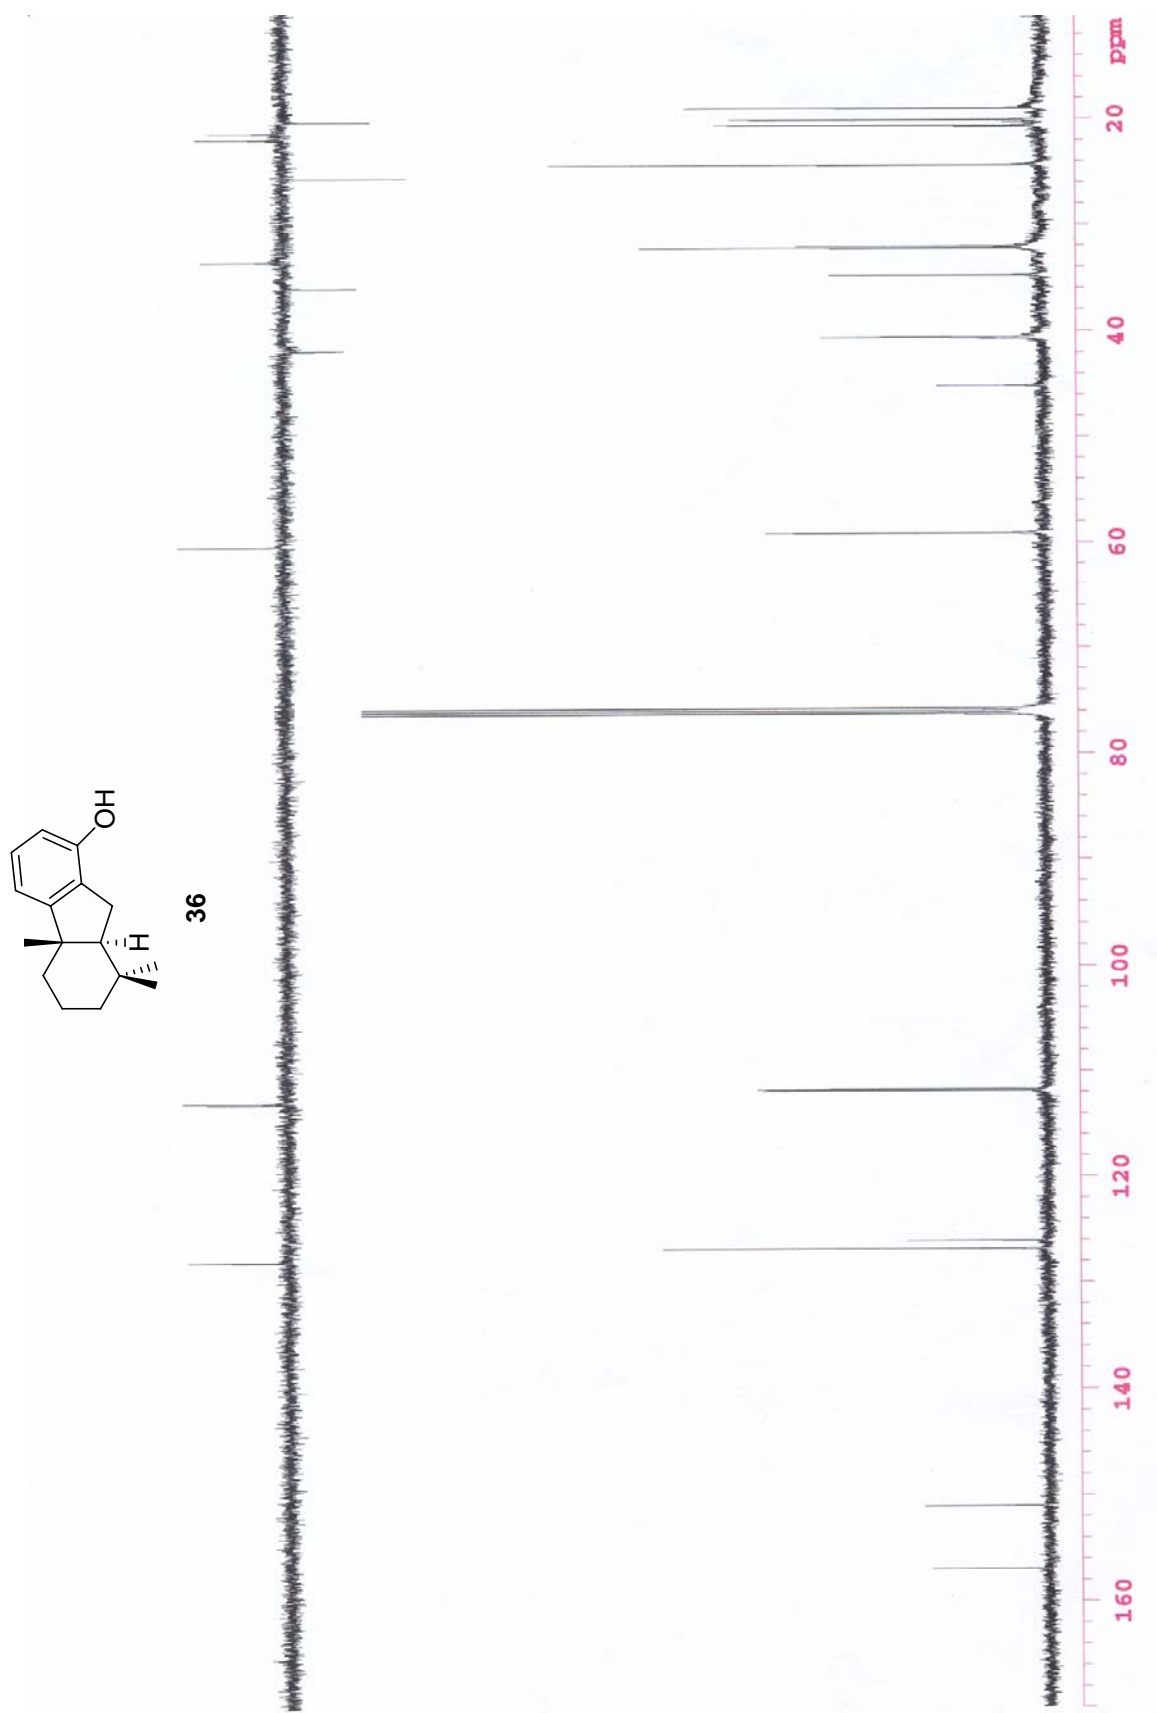

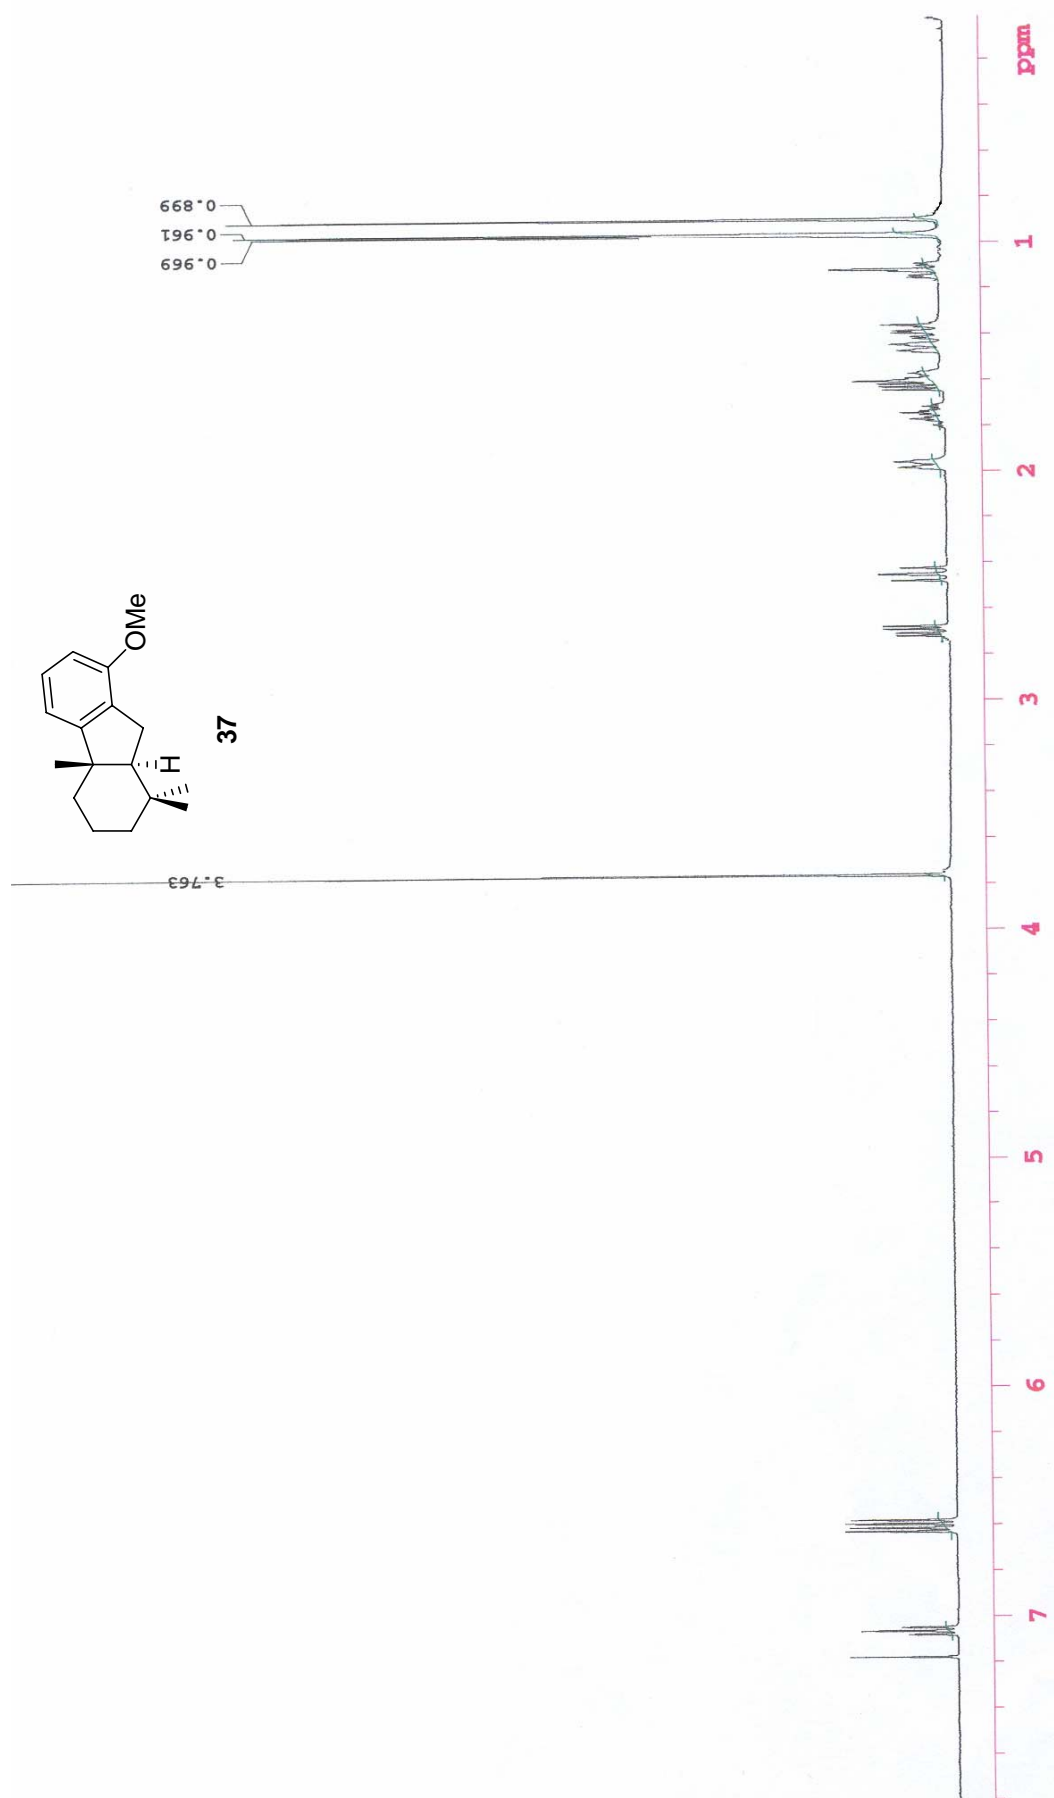



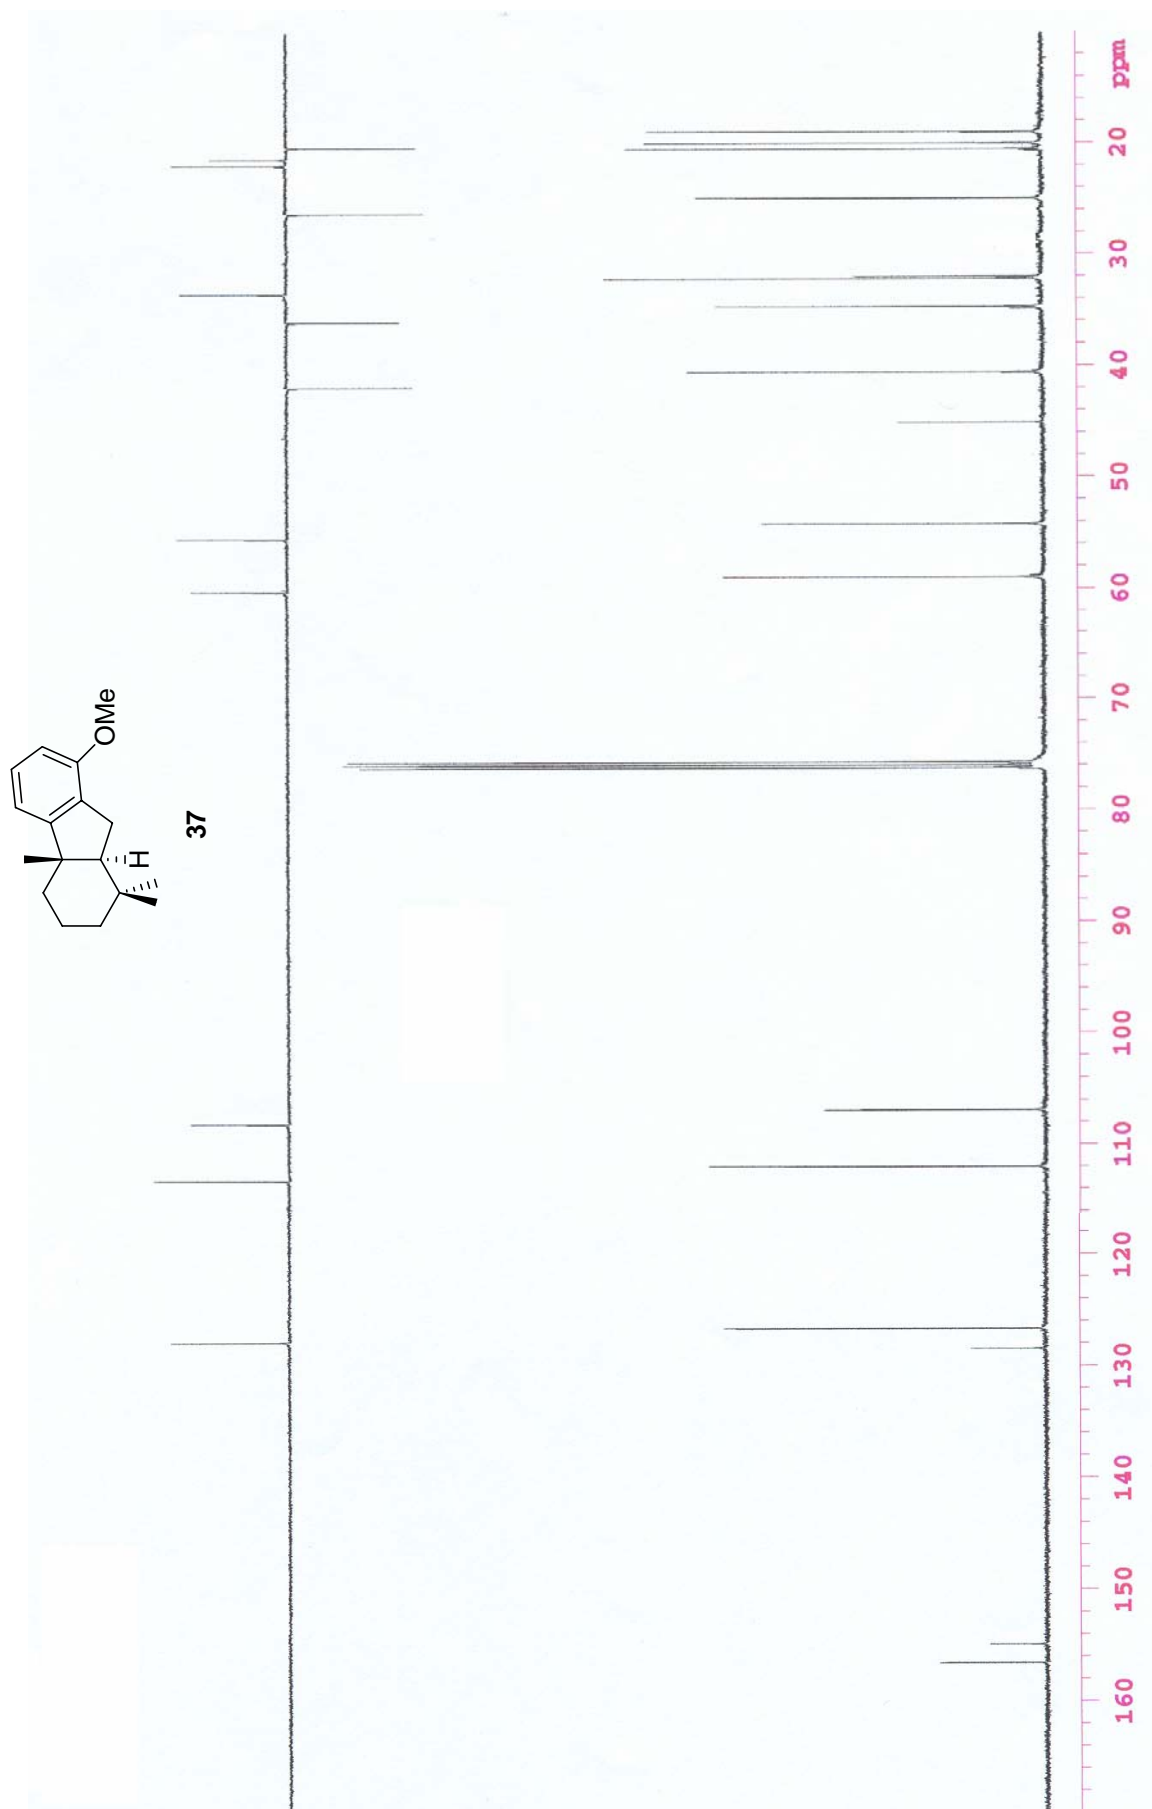

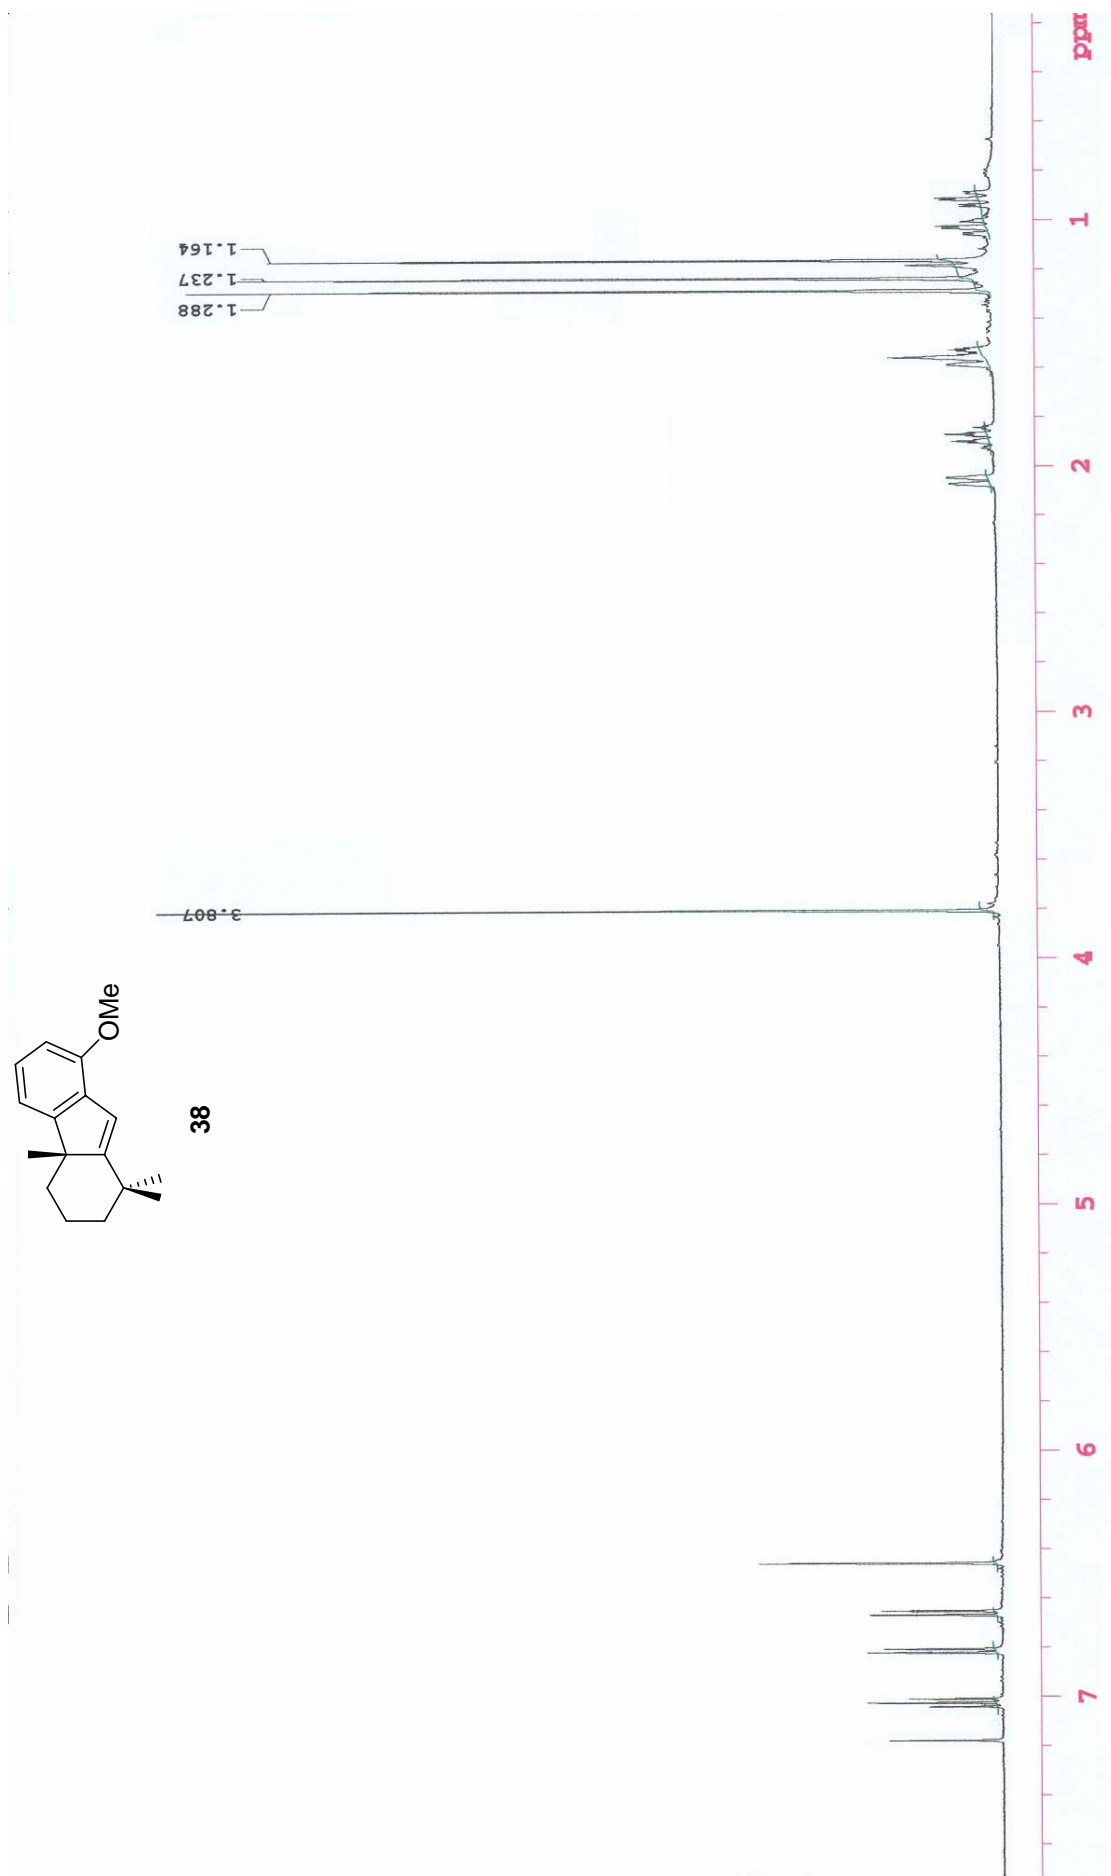

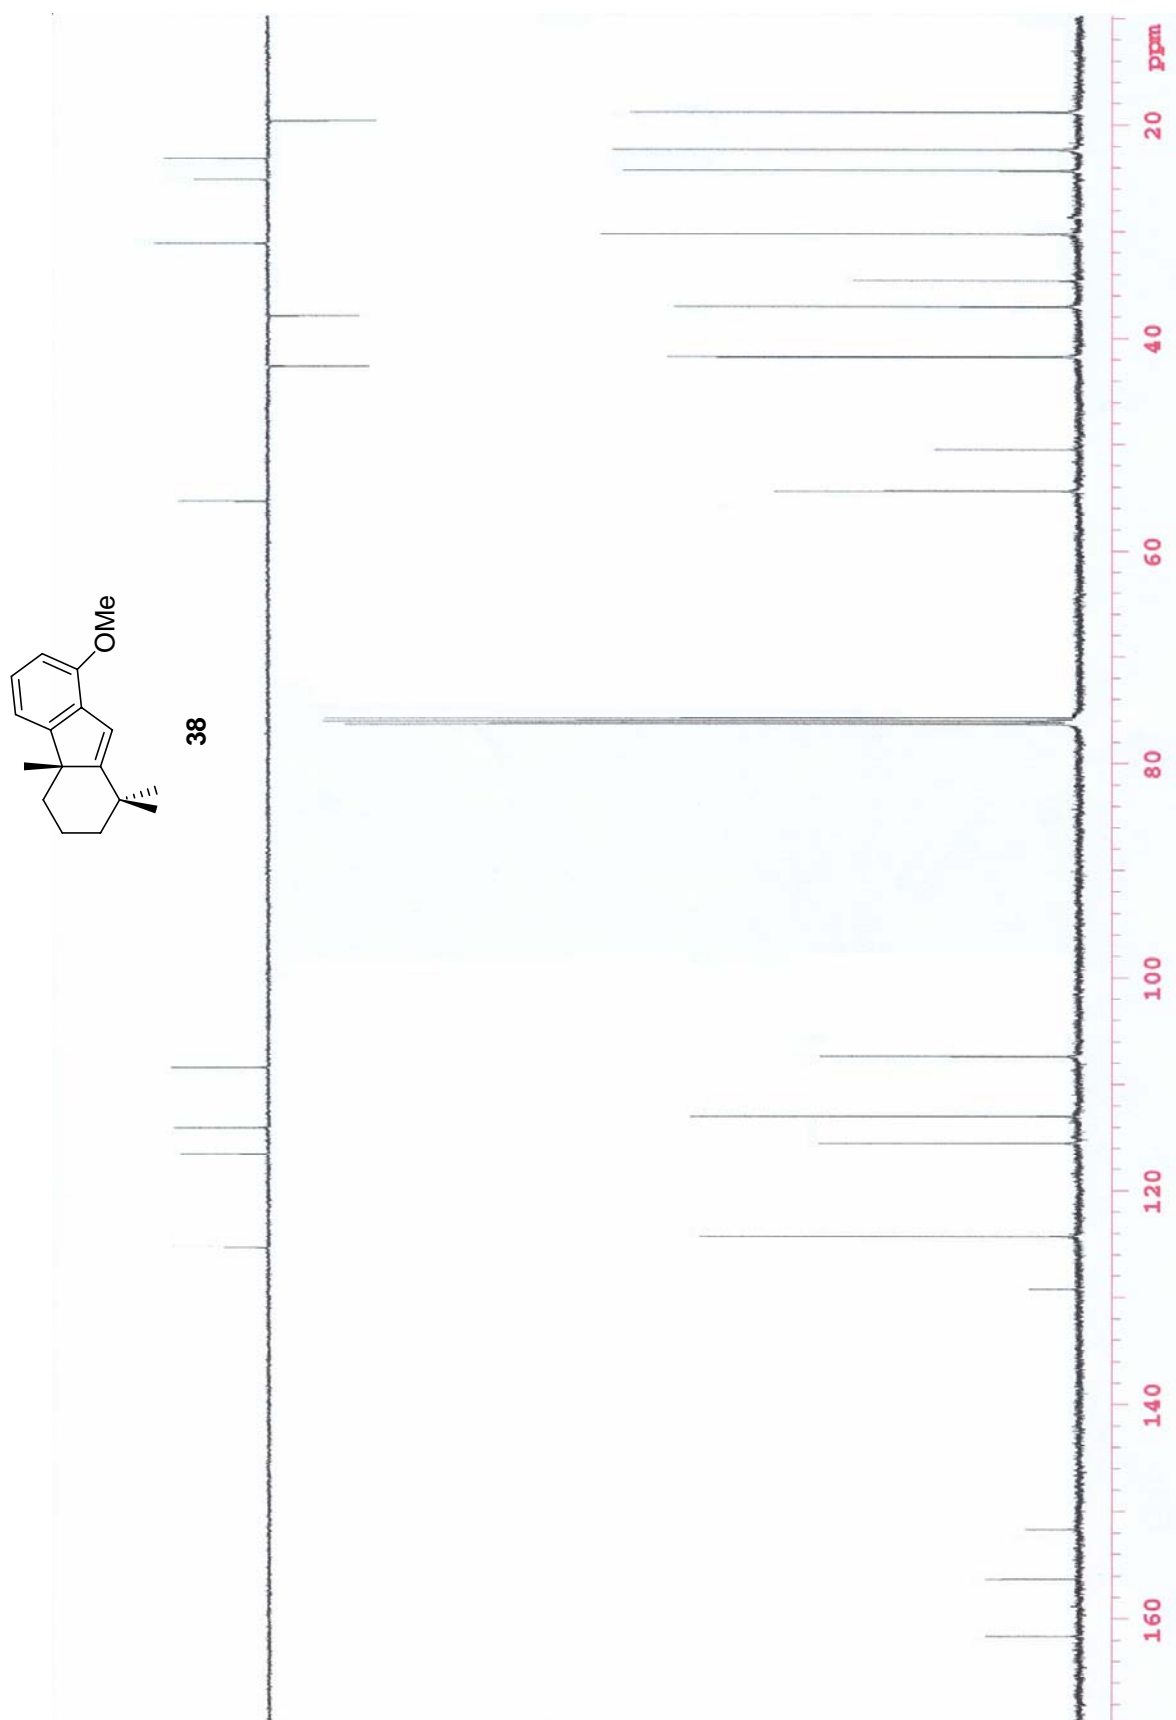

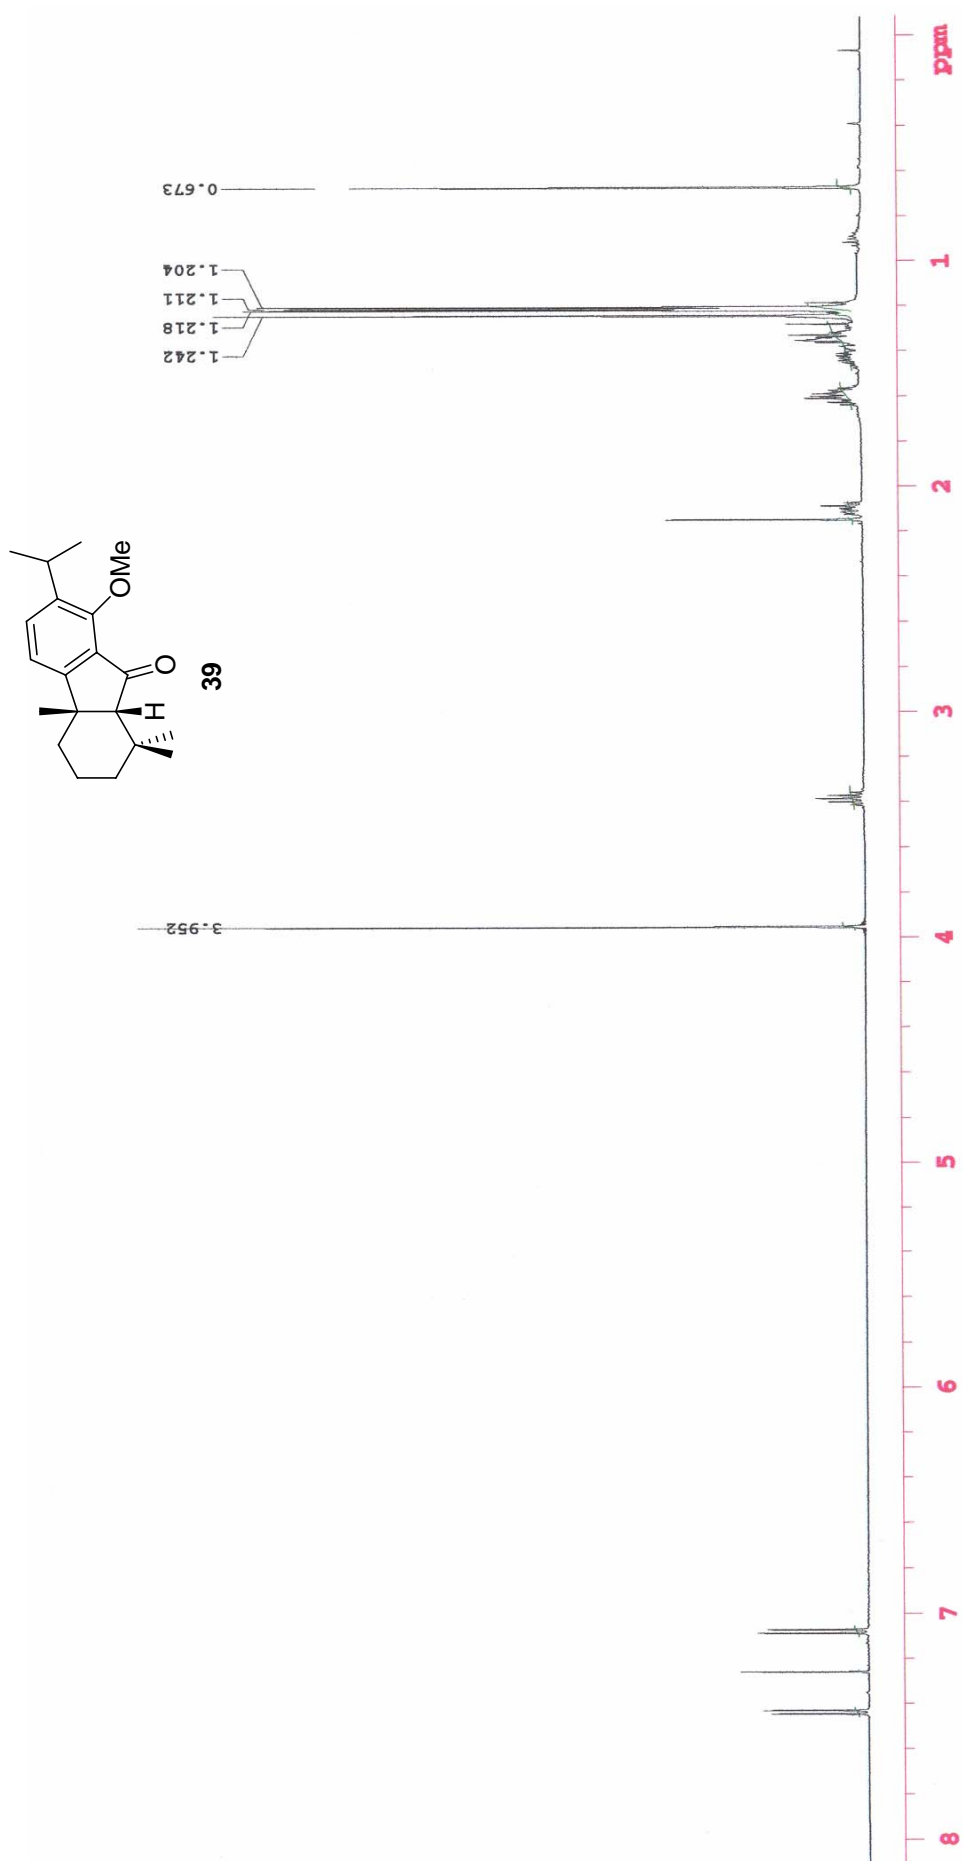

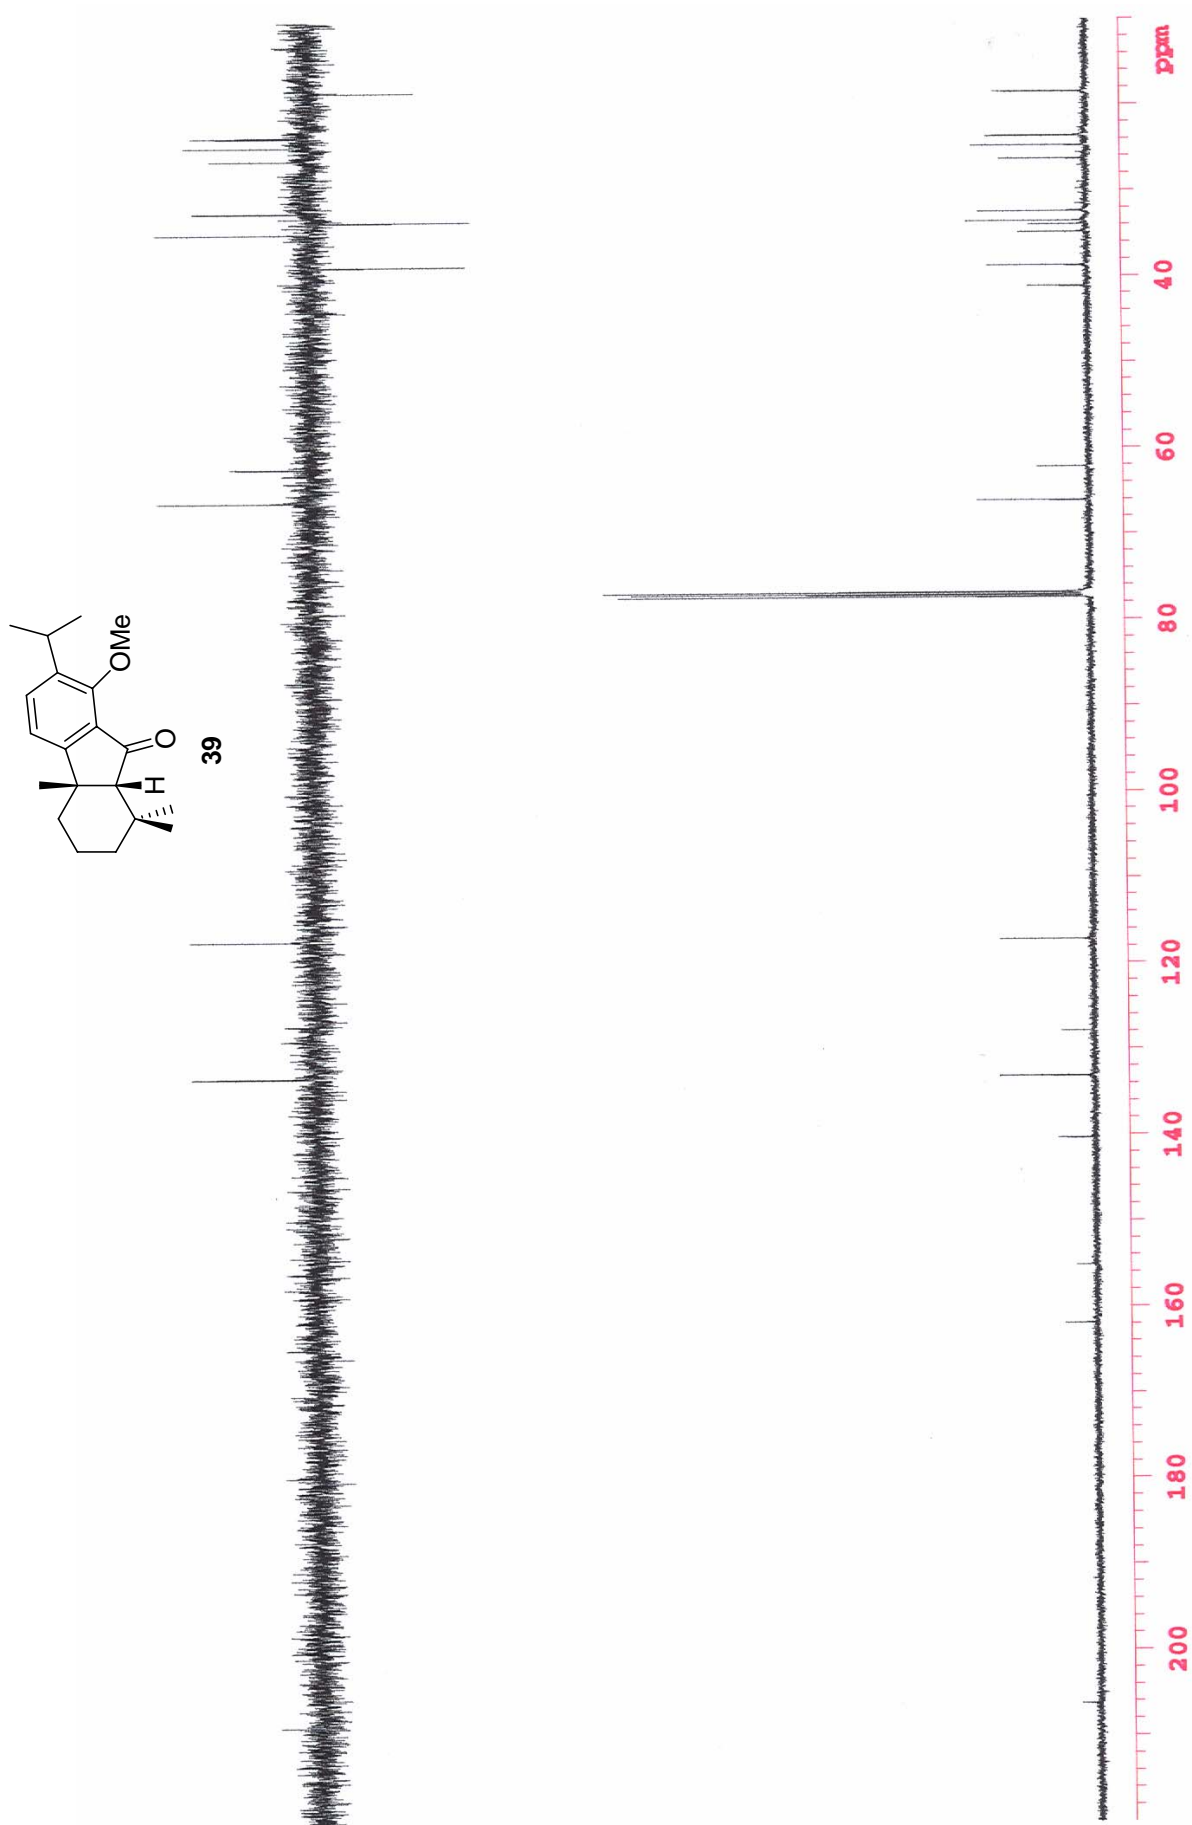

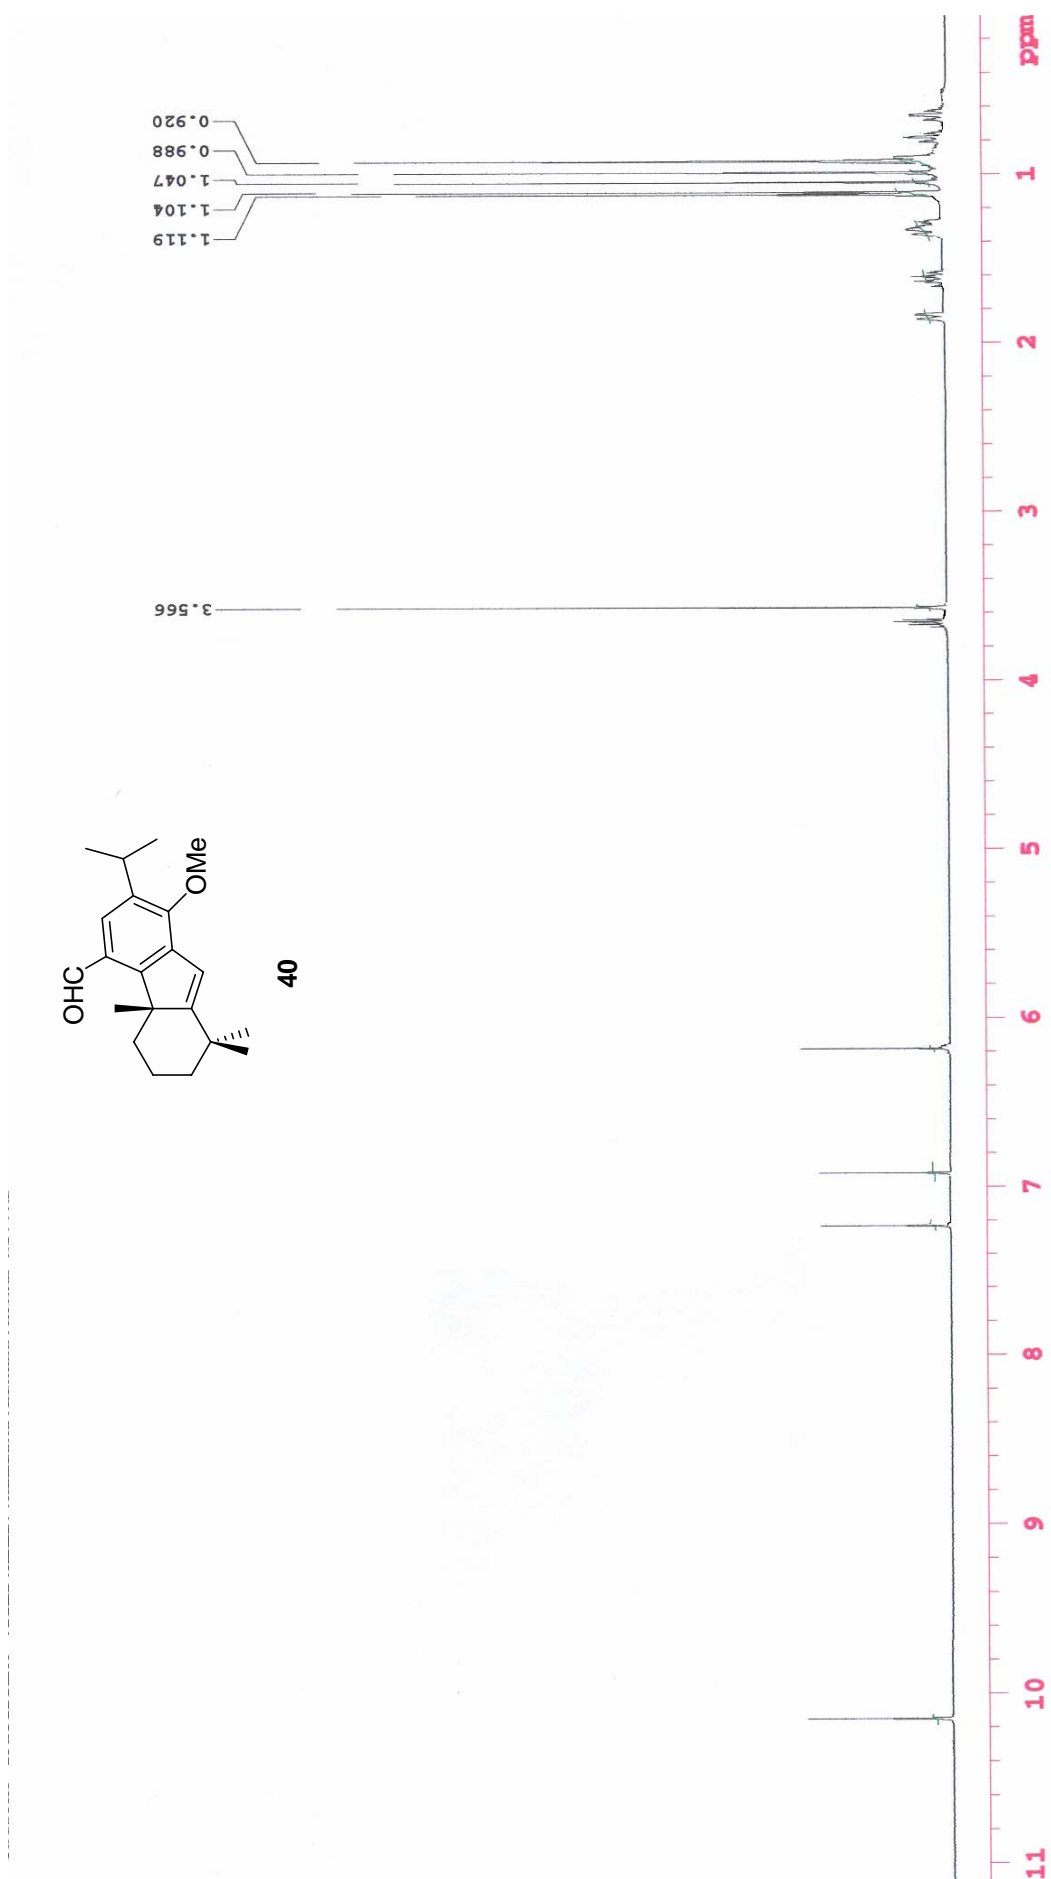

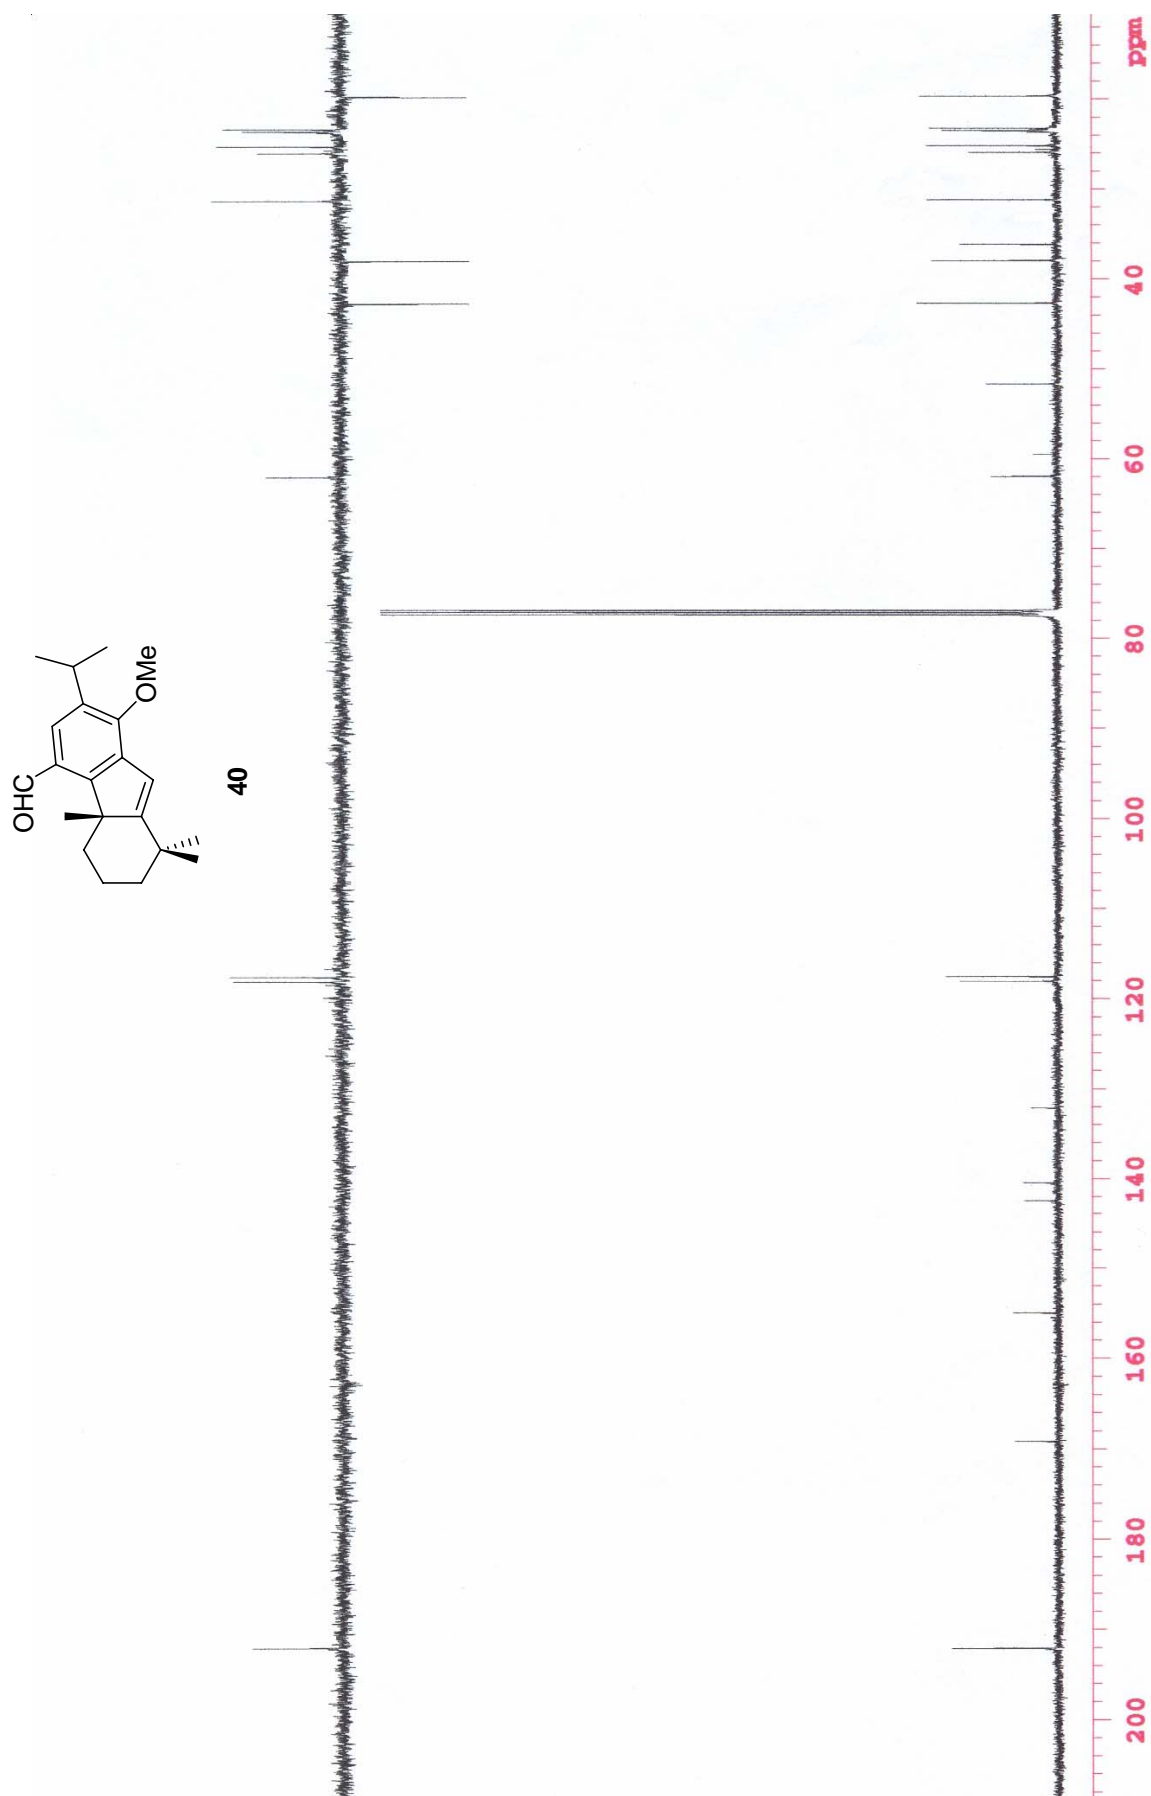

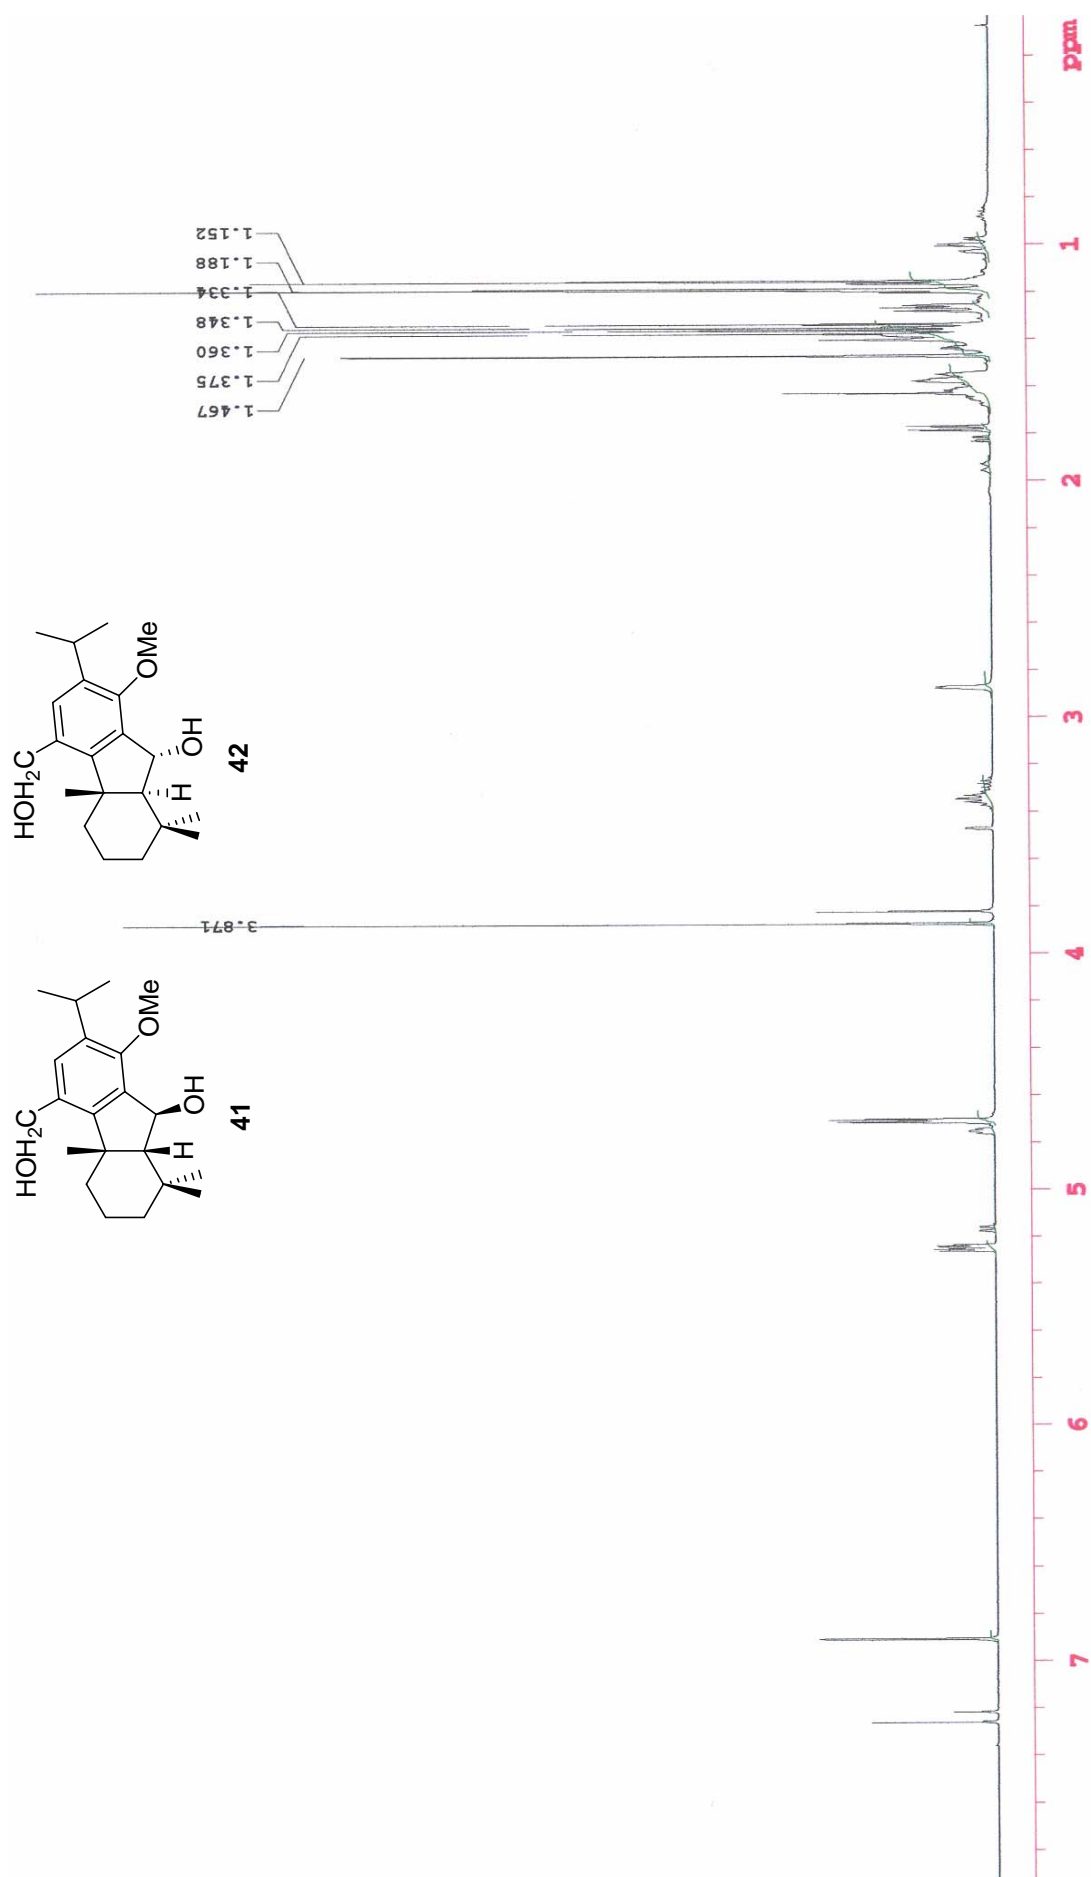



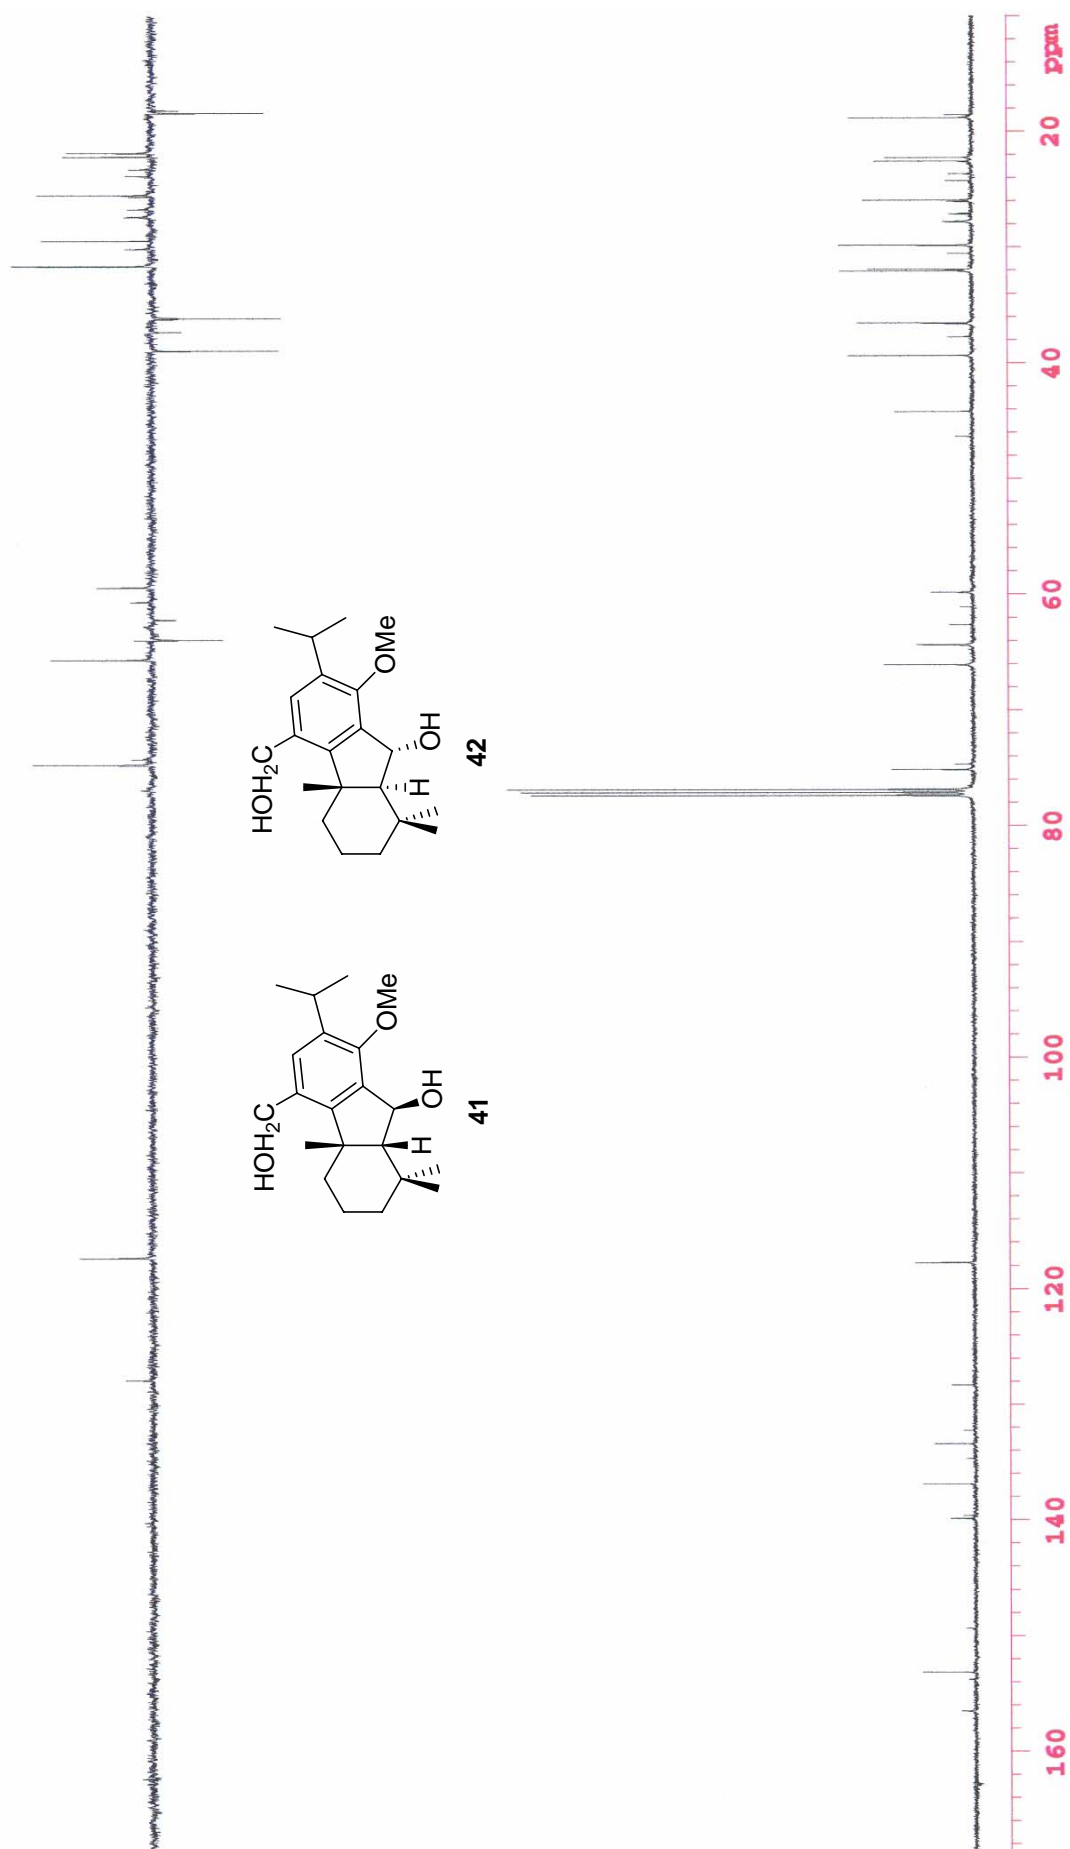

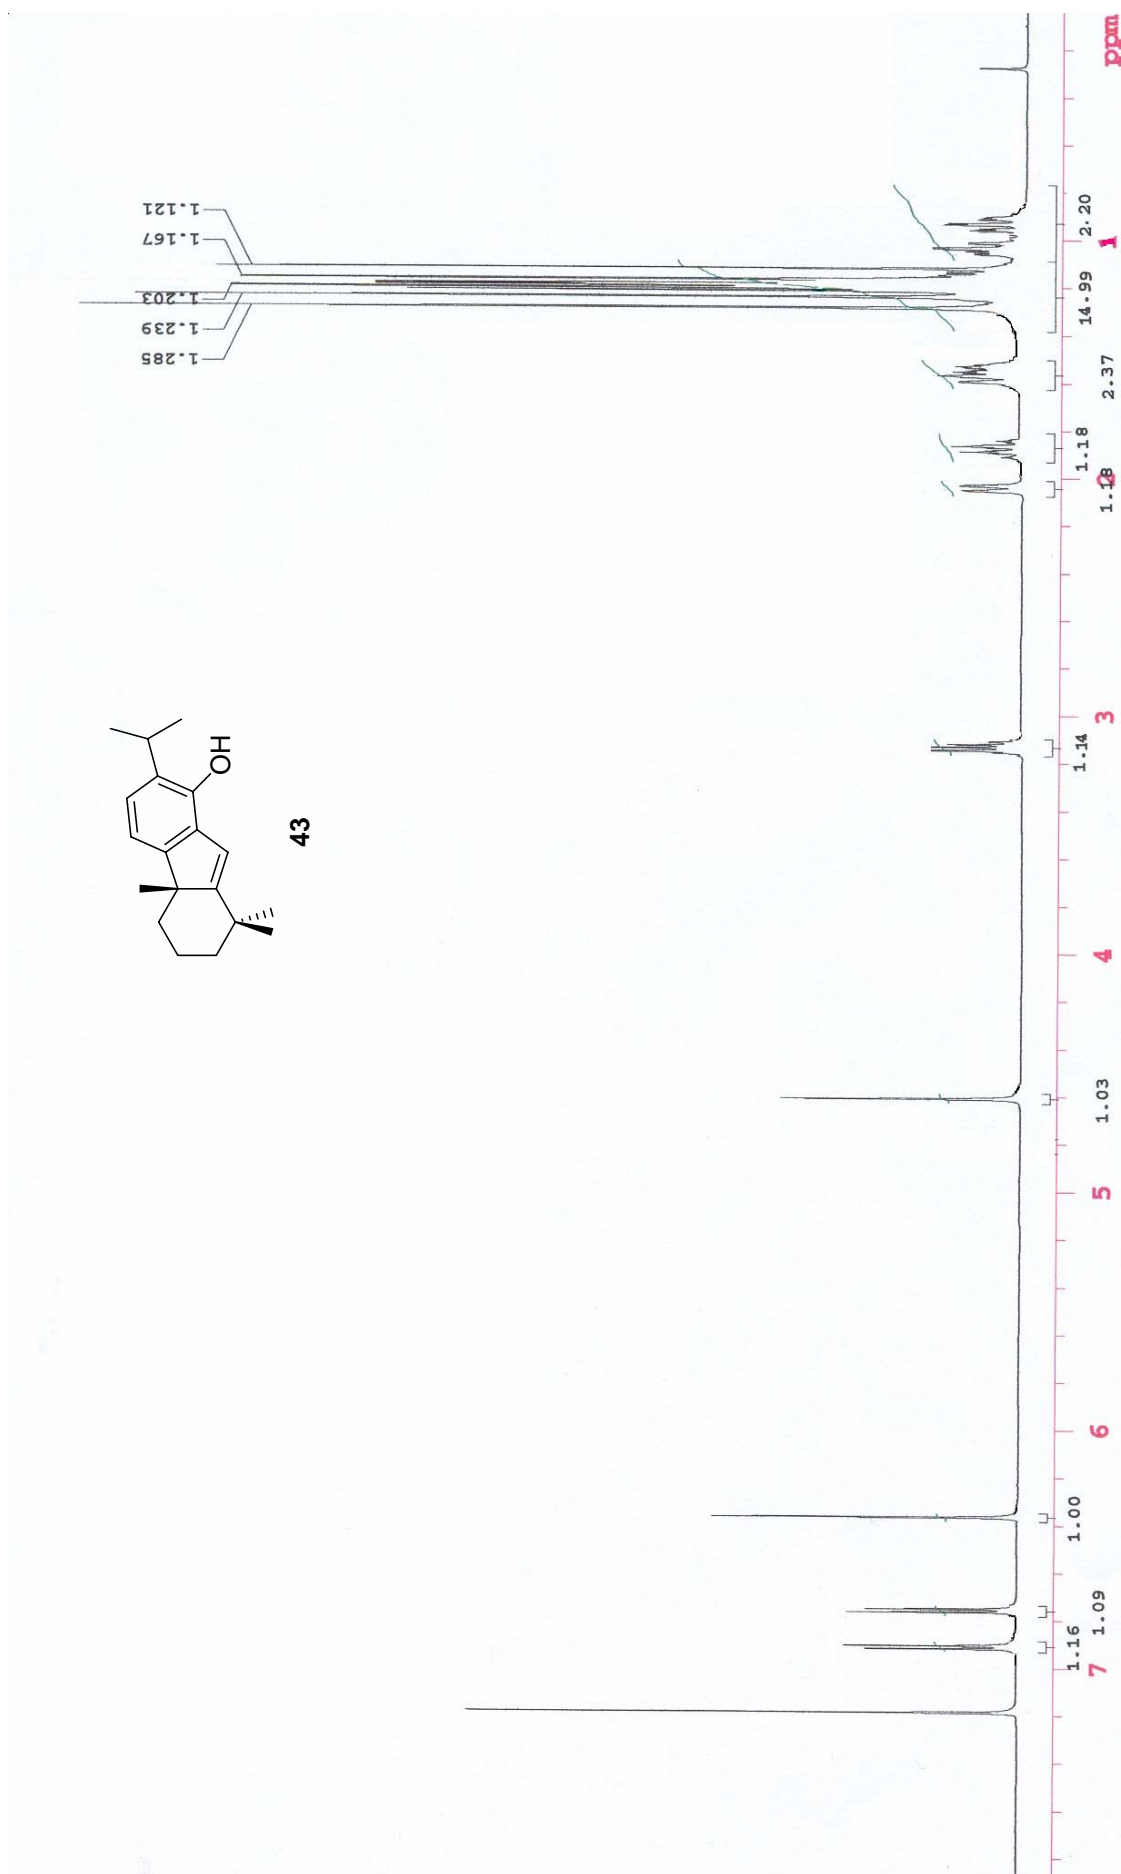

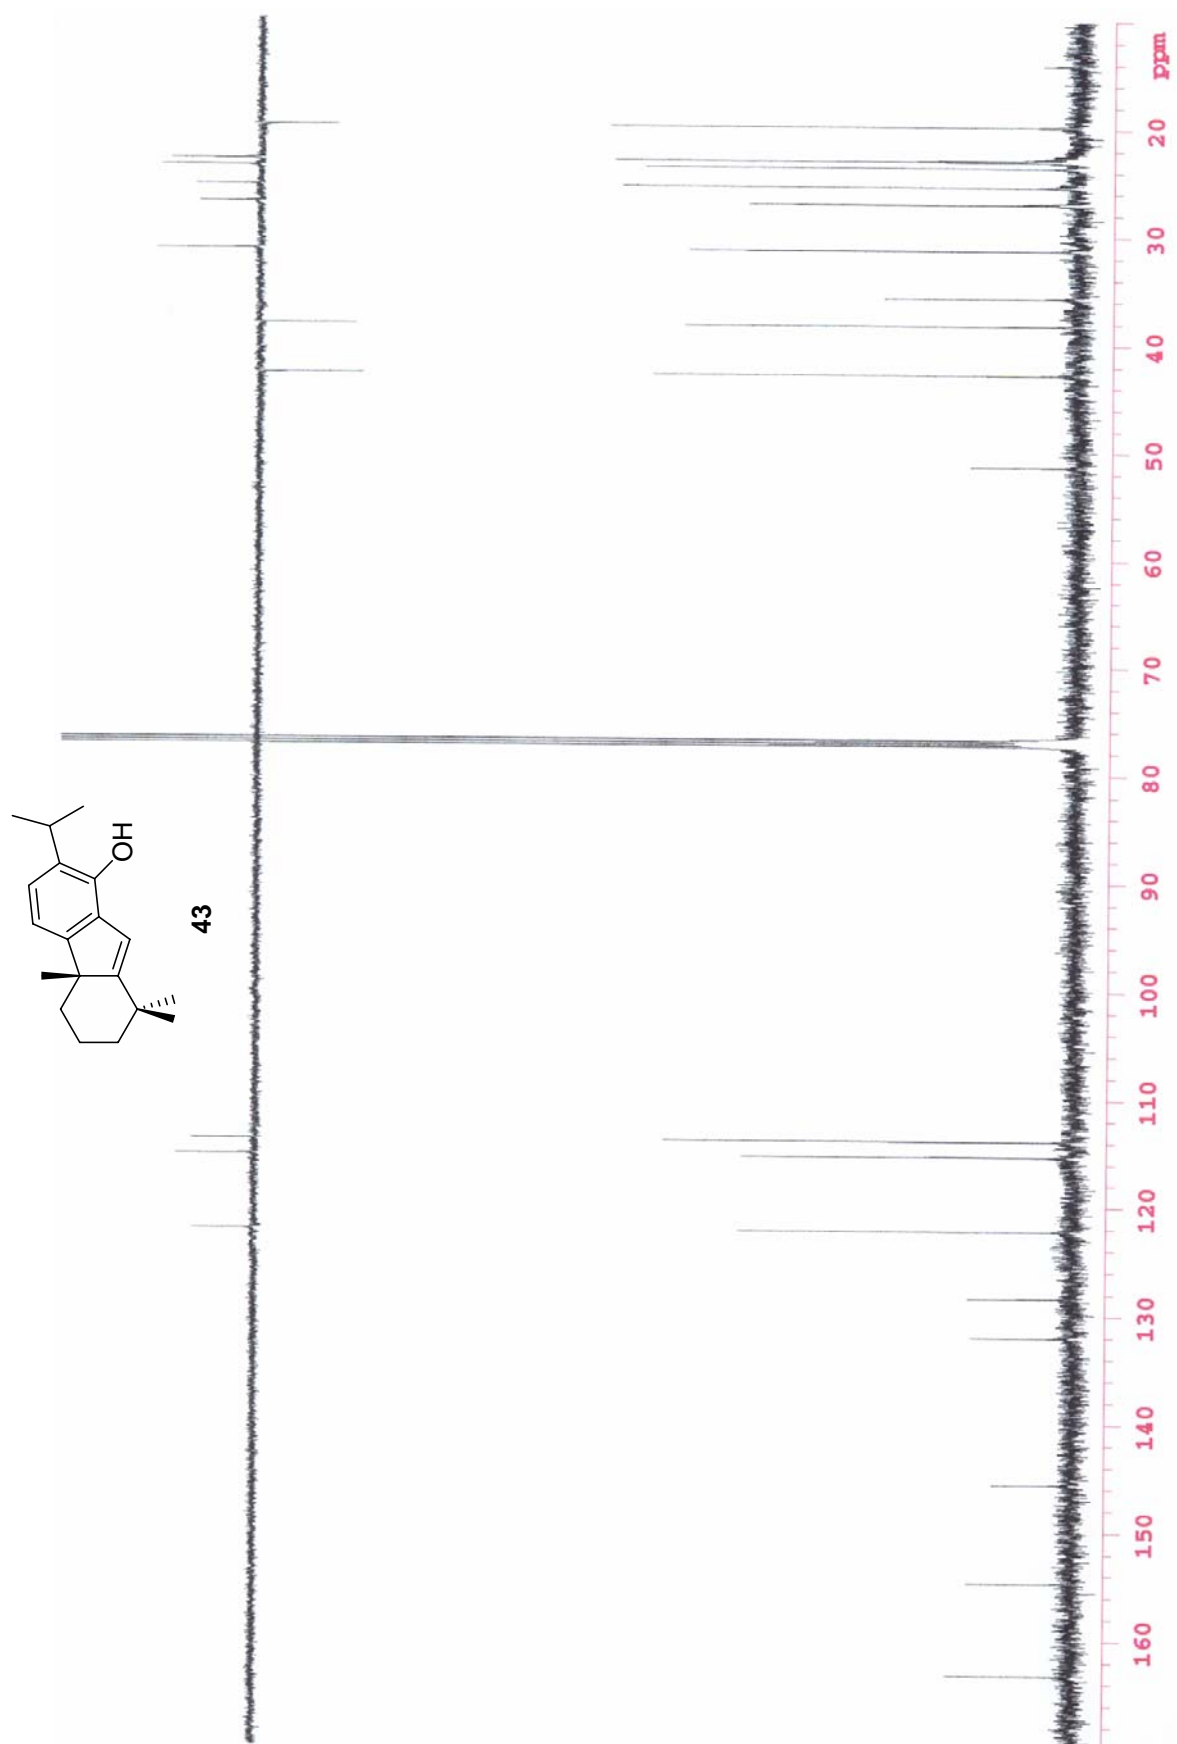

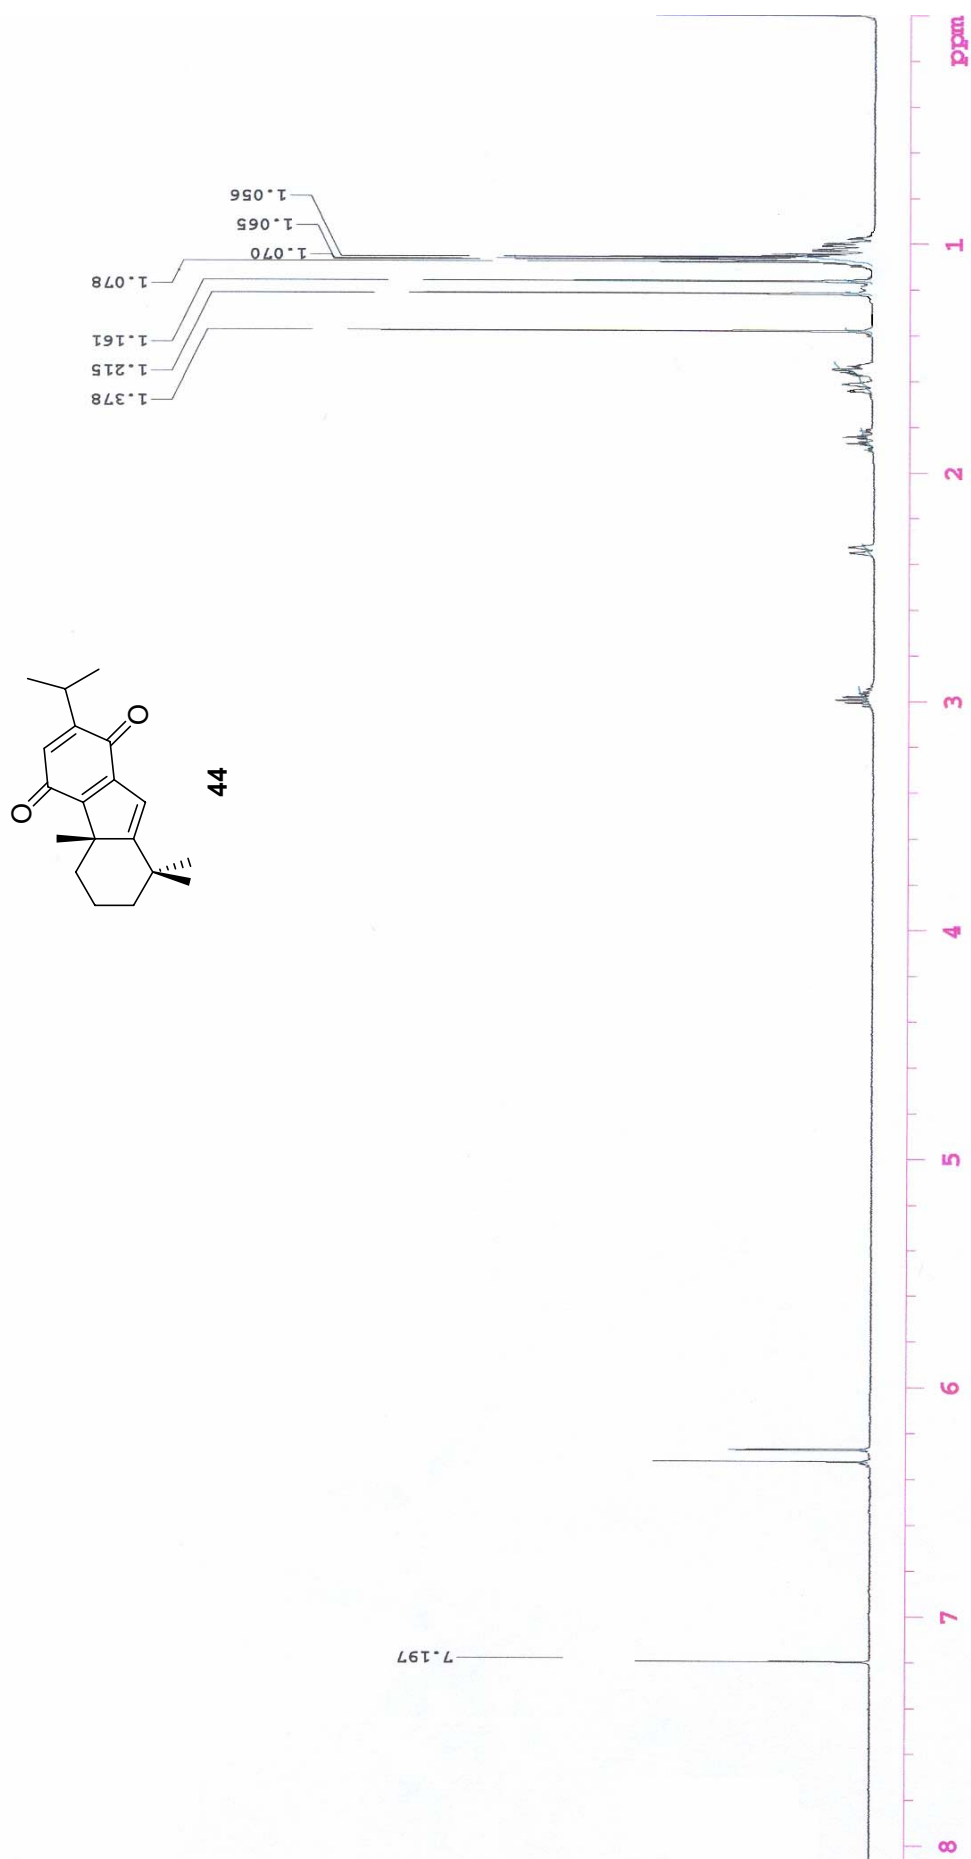

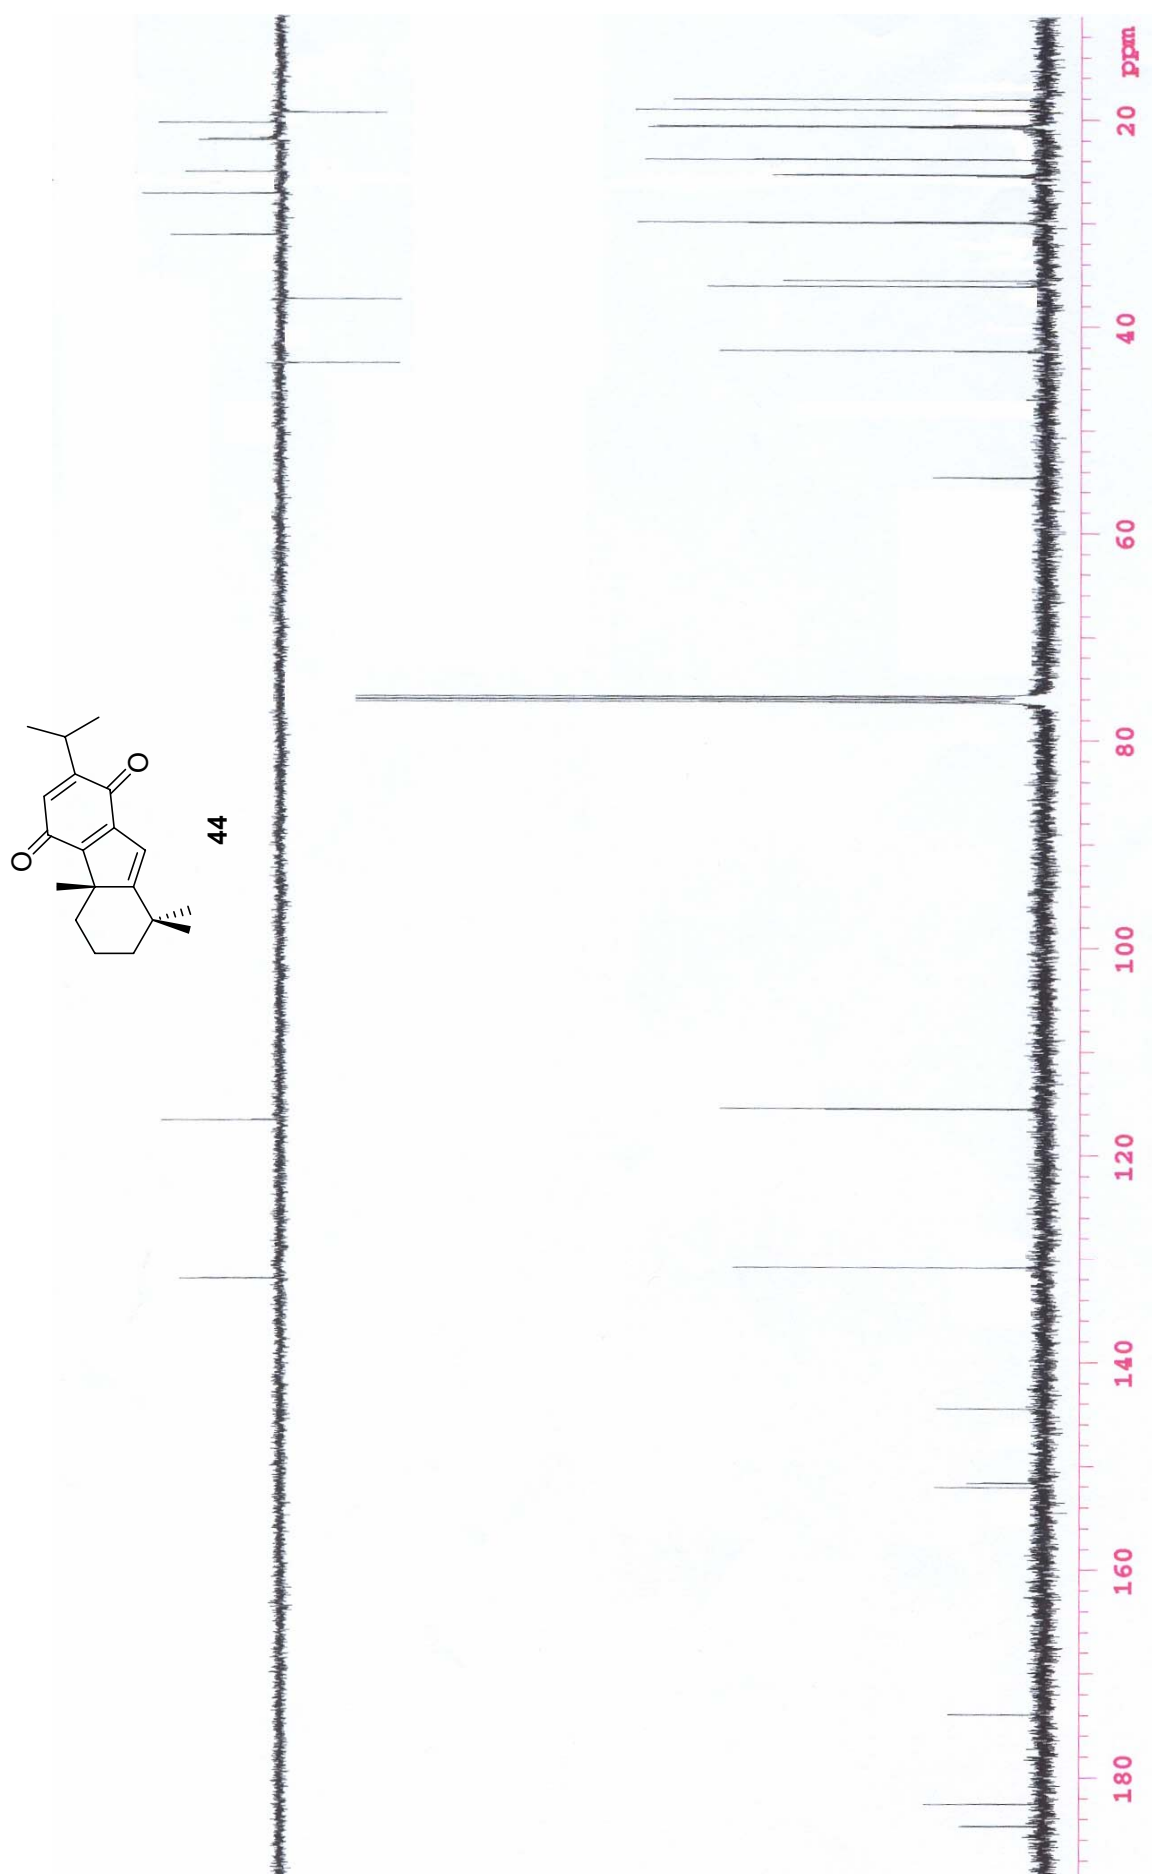

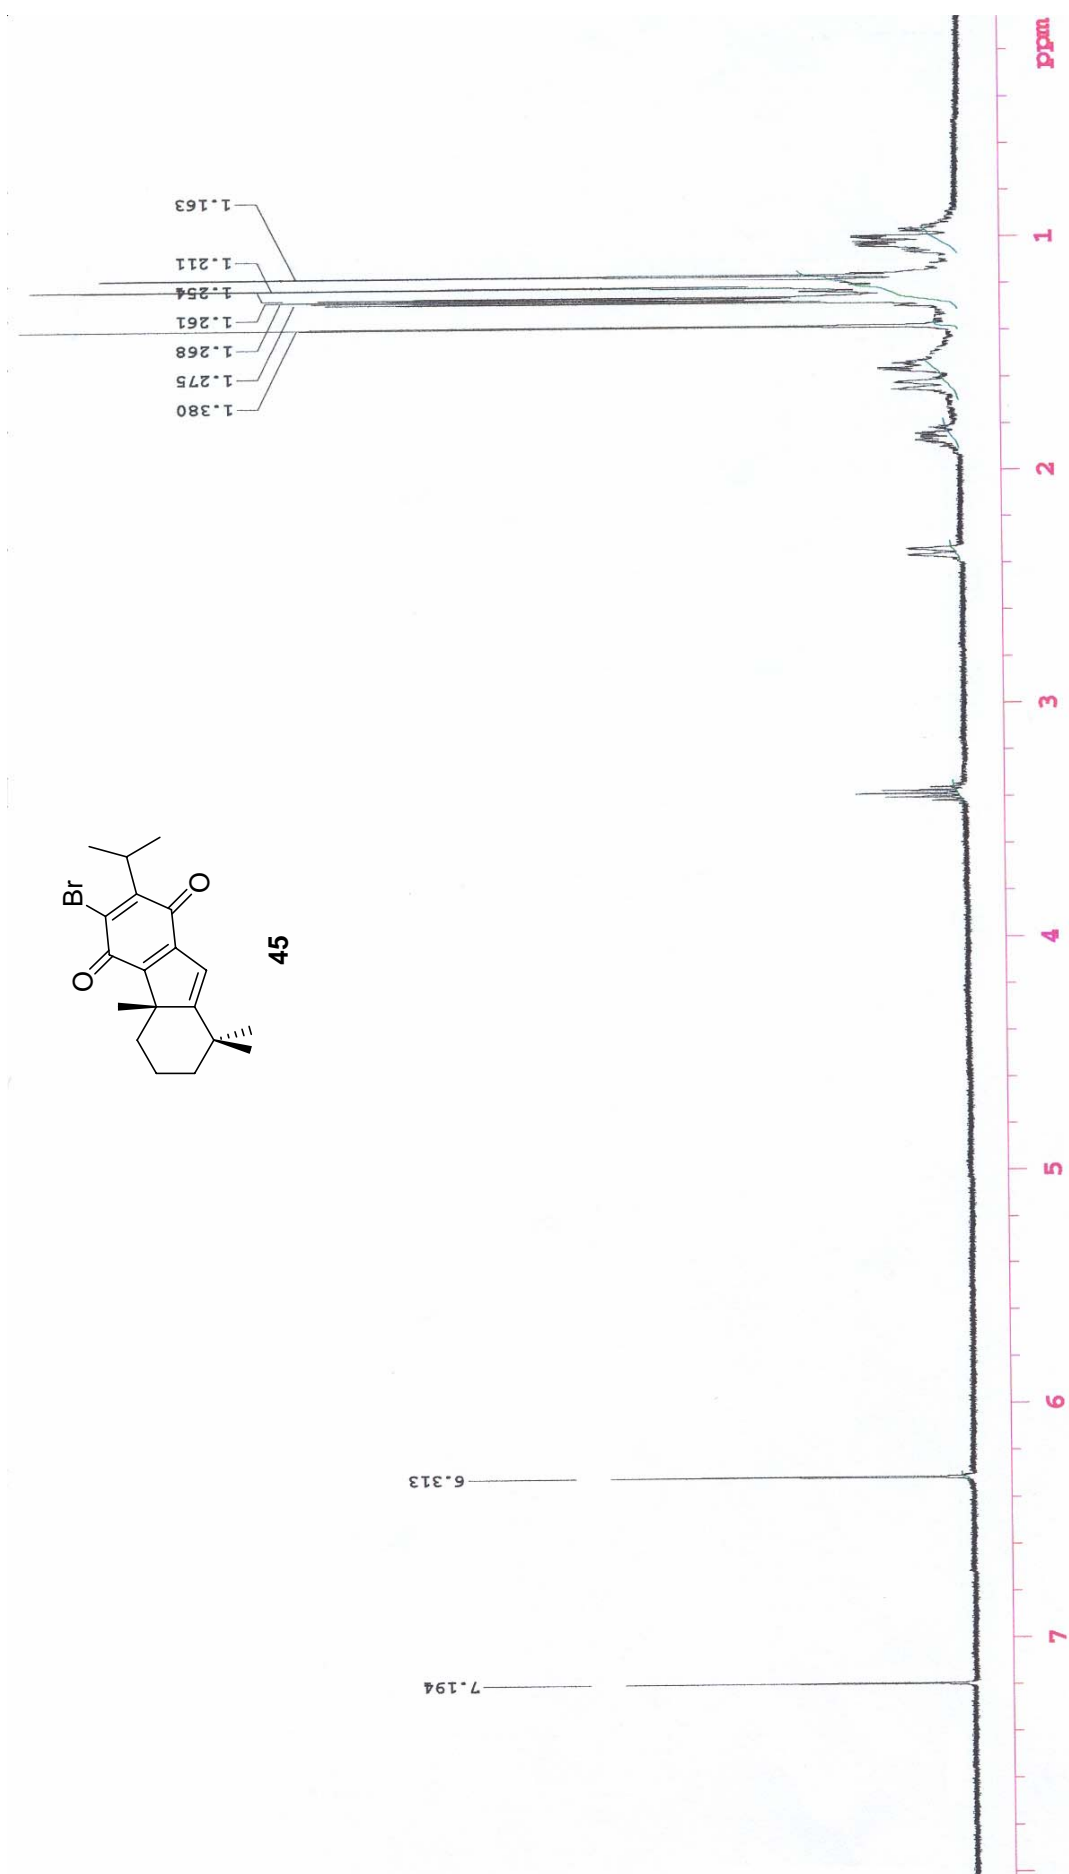

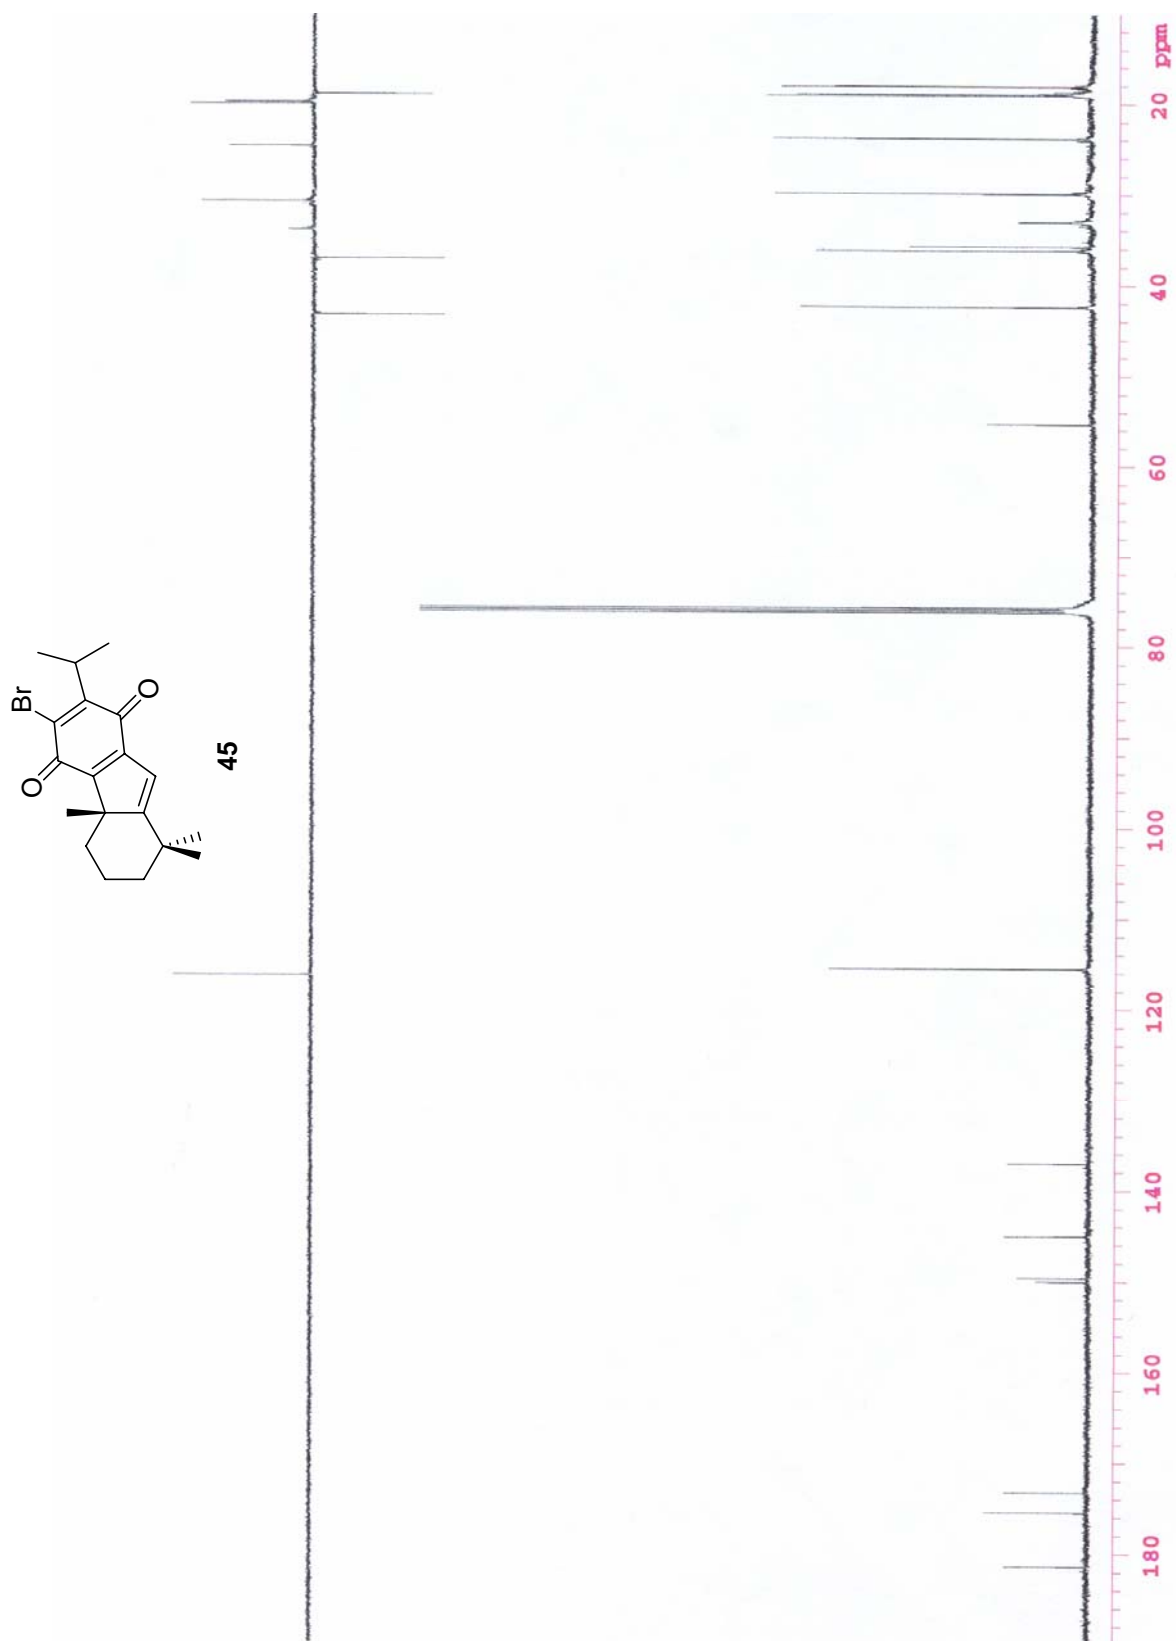

Supplement: b916209g.pdf [file b916209g.pdf]
